# Supplementary material
Source: publisher figshare collection journal article supplement (https://tandf.figshare.com/ndownloader/files/2178435)
Supplement: Supplementary file 1 [file 2178435]

## Sheet: Sheet1
Table S5. X-chromosome β-values for four LCLs treated with DMSO vehicle control or JQ1
CpG_ID	GM07055	GM07055_JQ1	Difference	GM12815	GM12815_JQ1	Difference	GM12892	GM12892_JQ1	Difference	GM12878	GM12878_JQ1	Difference
cg00005617	0.126935	0.129519	-0.00258402	0.233981	0.229939	0.00404146	0.136989	0.108245	0.0287438	0.210967	0.189128	0.0218384
cg00006815	0.587728	0.545834	0.0418939	0.558525	0.571678	-0.0131536	0.682559	0.633658	0.0489019	0.538741	0.534597	0.0041443
cg00008932	0.392091	0.353642	0.0384491	0.0520985	0.0680803	-0.0159818	0.159088	0.16568	-0.00659189	0.0836295	0.0833712	0.000258263
cg00011200	0.555154	0.55566	-0.000505663	0.4781	0.517171	-0.0390705	0.681274	0.73293	-0.0516561	0.50566	0.544552	-0.0388916
cg00012395	0.873124	0.892456	-0.0193325	0.883448	0.905437	-0.0219885	0.46806	0.489722	-0.0216628	0.886177	0.853565	0.0326118
cg00016522	0.427357	0.435442	-0.00808422	0.579871	0.579796	7.45814e-05	0.737141	0.754498	-0.0173577	0.175804	0.161375	0.0144288
cg00018204	0.435959	0.390323	0.0456353	0.132911	0.0903593	0.0425514	0.140781	0.131468	0.00931282	0.417056	0.423509	-0.00645348
cg00021786	0.990035	0.990035	0	0.990035	0.990035	0	0.983574	0.990035	-0.00646058	0.990035	0.990035	0
cg00023415	0.63513	0.620238	0.0148926	0.796342	0.781489	0.0148536	0.494347	0.49619	-0.00184314	0.846081	0.814555	0.0315261
cg00029931	0.375523	0.38545	-0.00992769	0.325048	0.331324	-0.00627544	0.552735	0.563731	-0.0109957	0.20634	0.241972	-0.0356323
cg00031235	0.768788	0.804243	-0.0354552	0.594965	0.57851	0.0164548	0.50792	0.496448	0.0114721	0.835577	0.843295	-0.0077177
cg00032666	0.308078	0.301987	0.00609138	0.41877	0.425315	-0.00654541	0.191297	0.191051	0.000246309	0.538327	0.523555	0.0147723
cg00034639	0.738662	0.705287	0.0333746	NA	0.693238	NA	0.804253	0.800378	0.00387499	0.682689	0.683588	-0.000898615
cg00034731	0.112322	0.119803	-0.00748127	0.149194	0.144767	0.00442732	0.146614	0.166685	-0.0200715	0.395052	0.402747	-0.00769472
cg00037117	0.934827	0.934494	0.000333216	0.936801	0.937417	-0.000615516	0.948979	0.955385	-0.00640536	0.943973	0.94825	-0.00427739
cg00040455	0.49487	0.524221	-0.0293511	0.501938	0.509218	-0.00727991	0.766848	0.773746	-0.00689854	0.444303	0.430278	0.0140248
cg00040923	0.740892	0.769664	-0.0287712	0.75399	0.763582	-0.0095919	0.763748	0.765985	-0.00223734	0.60067	0.613973	-0.0133025
cg00046099	0.634564	0.632425	0.00213897	0.559045	0.607011	-0.047966	0.799188	0.790277	0.00891079	0.639008	0.647359	-0.00835037
cg00051952	0.465615	0.446043	0.0195722	0.560757	0.536988	0.0237691	0.071529	0.128128	-0.0565993	0.518631	0.464059	0.0545726
cg00072587	0.0518288	0.0630333	-0.0112045	0.0483519	0.0970949	-0.048743	0.0904405	0.0776371	0.0128034	0.229276	0.23411	-0.0048336
cg00072799	0.734498	0.740882	-0.00638369	0.694195	0.651628	0.0425665	0.765395	0.764041	0.00135384	0.594458	0.61442	-0.0199623
cg00078867	0.361848	0.350428	0.0114194	0.239536	0.233285	0.00625085	0.40397	0.389293	0.0146766	0.405103	0.453011	-0.0479076
cg00098732	0.0365797	0.0384521	-0.00187237	0.0538595	0.0334455	0.0204141	0.0371852	0.0537299	-0.0165447	0.109317	0.113773	-0.00445571
cg00108056	0.365698	0.361536	0.00416168	0.377157	0.405071	-0.0279136	0.335227	0.348025	-0.0127984	0.370522	0.369778	0.000744735
cg00111239	0.192261	0.170392	0.0218684	0.565368	0.563355	0.00201313	0.196022	0.195625	0.000397265	0.154237	0.137443	0.0167935
cg00113623	0.478005	0.493473	-0.0154683	0.590232	0.61955	-0.0293178	0.744121	0.7532	-0.00907978	0.573224	0.56644	0.00678491
cg00117066	0.134793	0.109927	0.0248656	0.0539764	0.063872	-0.00989566	0.479181	0.486792	-0.00761083	0.562721	0.56758	-0.00485892
cg00120172	0.743976	0.755006	-0.0110299	0.793079	0.773555	0.0195233	0.509112	0.524576	-0.015464	0.878234	0.897594	-0.01936
cg00121904	0.375413	0.39739	-0.0219764	0.368454	0.370295	-0.00184004	0.187305	0.213297	-0.0259923	0.141905	0.121682	0.0202232
cg00123001	0.797573	0.803759	-0.0061865	0.862564	0.818194	0.0443692	0.571643	0.561378	0.0102653	0.838079	0.791851	0.0462279
cg00124708	0.487522	0.511261	-0.0237396	0.540182	0.515582	0.0245996	0.399638	0.4042	-0.00456174	0.697418	0.671984	0.0254343
cg00126657	0.0673496	0.0421118	0.0252379	0.130121	0.143499	-0.0133775	0.231691	0.220647	0.0110439	0.0871788	0.0865365	0.000642279
cg00126698	0.143039	0.12634	0.0166984	0.235064	0.23411	0.000954084	0.0529186	0.0430718	0.00984674	0.0385194	0.0383383	0.000181137
cg00128197	0.468611	0.46735	0.00126088	0.126844	0.134666	-0.00782193	0.489565	0.490214	-0.000648989	0.0727395	0.0789607	-0.00622113
cg00130498	0.448096	0.427184	0.0209125	0.193349	0.190852	0.00249716	0.444857	0.459041	-0.0141842	0.466739	0.442677	0.0240629
cg00136787	0.876024	0.852972	0.0230525	0.555248	0.532243	0.023005	0.785815	0.781775	0.00403995	0.837848	0.840604	-0.00275624
cg00139317	0.573459	0.594429	-0.0209699	0.599391	0.62243	-0.0230389	0.605718	0.627706	-0.0219876	0.569934	0.603163	-0.0332291
cg00139547	0.529172	0.504525	0.024647	0.51655	0.551134	-0.0345842	0.649628	0.699137	-0.049509	0.494124	0.496004	-0.00187987
cg00140189	0.389329	0.358814	0.0305151	0.479271	0.438515	0.0407553	0.410207	0.410141	6.61678e-05	0.421637	0.39375	0.0278865
cg00141845	0.257819	0.307392	-0.0495736	0.0986817	0.128872	-0.03019	0.448088	0.427963	0.0201248	0.501675	0.493382	0.00829315
cg00147819	0.844011	0.840998	0.00301292	0.141723	0.127369	0.0143541	0.629325	0.620657	0.00866759	0.530034	0.482732	0.0473021
cg00148031	0.0816159	0.0759703	0.00564557	0.0978519	0.0897659	0.00808596	0.0939948	0.0908845	0.00311033	0.133951	0.124319	0.00963213
cg00148587	0.40557	0.342647	0.0629231	0.591166	0.50484	0.0863255	0.0751841	0.0910817	-0.0158976	0.355168	0.302288	0.0528795
cg00150874	0.755891	0.762834	-0.0069432	0.524066	0.515495	0.00857025	0.760919	0.678564	0.0823544	0.747143	0.745692	0.00145021
cg00156802	0.799071	0.807287	-0.00821569	0.805967	0.835909	-0.0299421	0.688699	0.645464	0.0432352	0.716509	0.67038	0.0461287
cg00157034	0.793266	0.78739	0.00587559	0.526322	0.572757	-0.0464343	0.825657	0.803696	0.0219609	0.710876	0.714695	-0.00381856
cg00158454	0.511712	0.523397	-0.0116854	0.815728	0.832012	-0.0162841	0.631097	0.61972	0.0113771	0.844704	0.866599	-0.0218952
cg00168417	0.0760256	0.0833988	-0.00737318	0.0562971	0.0609252	-0.00462806	0.10694	0.138785	-0.031845	0.16651	0.150186	0.0163245
cg00170369	0.664736	0.634342	0.0303934	0.68241	0.68833	-0.00591925	0.424428	0.439745	-0.0153164	0.636164	0.608362	0.027802
cg00173270	0.472803	0.468403	0.0043996	0.693196	0.701506	-0.00831027	0.381143	0.385526	-0.00438301	0.162822	0.17029	-0.00746814
cg00177456	0.417406	0.463863	-0.0464569	0.516834	0.47835	0.0384839	0.127959	0.150599	-0.0226405	0.481786	0.508853	-0.0270669
cg00179598	0.543354	0.523186	0.0201687	0.10479	0.100568	0.00422264	0.120378	0.130235	-0.00985656	0.591635	0.622617	-0.030982
cg00180631	0.661095	0.673624	-0.012529	0.570202	0.574239	-0.0040377	0.75239	0.768629	-0.0162386	0.543654	0.565713	-0.0220589
cg00188257	0.0688732	0.0667693	0.00210398	0.162091	0.130495	0.0315962	0.136044	0.163858	-0.0278138	0.101138	0.120871	-0.0197325
cg00188409	0.439905	0.411102	0.0288025	0.0613978	0.0499368	0.011461	0.495349	0.47918	0.0161683	0.231736	0.281556	-0.04982
cg00188971	0.803402	0.789446	0.013956	0.583633	0.590508	-0.0068752	0.531666	0.494616	0.0370497	0.735392	0.702601	0.032791
cg00190642	0.762223	0.771039	-0.00881677	0.485425	0.479232	0.00619304	0.607305	0.63066	-0.0233555	0.747026	0.749142	-0.00211674
cg00191052	0.560575	0.519868	0.0407064	0.581871	0.616171	-0.0342999	0.697038	0.721135	-0.0240977	0.570495	0.549986	0.0205097
cg00191758	0.369999	0.418484	-0.0484852	0.482013	0.500142	-0.0181295	0.346402	0.357339	-0.0109365	0.454663	0.457282	-0.00261848
cg00191903	0.622006	0.639195	-0.0171887	0.408755	0.393666	0.0150894	0.0644653	0.0645488	-8.34442e-05	0.626438	0.667917	-0.0414785
cg00194519	0.725132	0.715884	0.0092481	0.516073	0.506906	0.00916731	0.56737	0.566857	0.000513132	0.48888	0.491601	-0.00272155
cg00195237	0.515202	0.524173	-0.00897167	0.399515	0.378337	0.0211788	0.441274	0.463701	-0.022427	0.339257	0.356523	-0.017266
cg00202711	0.328913	0.36085	-0.0319368	0.143519	0.150654	-0.00713481	0.860772	0.857314	0.00345846	0.09396	0.0909567	0.0030033
cg00203568	0.472015	0.441245	0.03077	0.221567	0.214246	0.00732139	0.704323	0.676272	0.0280511	0.503976	0.562947	-0.0589713
cg00203804	0.546944	0.560547	-0.0136028	0.663759	0.680476	-0.0167172	0.409742	0.415182	-0.00544033	0.564564	0.56828	-0.00371615
cg00205905	0.701611	0.75693	-0.0553191	0.856252	0.850751	0.00550058	0.519249	0.512101	0.00714813	0.792333	0.774829	0.0175044
cg00206332	0.0434315	0.0313714	0.0120601	0.0599211	0.0501044	0.00981668	0.0506286	0.0551819	-0.00455324	0.0377782	0.0345617	0.00321654
cg00207916	0.736484	0.749106	-0.0126222	0.857434	0.855878	0.00155628	0.873197	0.875832	-0.00263418	0.873132	0.847757	0.0253751
cg00213853	0.408196	0.418001	-0.0098055	0.442613	0.470203	-0.0275897	0.516157	0.529642	-0.0134847	0.412959	0.414405	-0.00144655
cg00213957	0.492957	0.482048	0.0109087	0.49225	0.51887	-0.0266198	0.631503	0.666583	-0.0350805	0.420452	0.416875	0.00357705
cg00216997	0.423413	0.430061	-0.00664726	0.479147	0.528499	-0.0493522	0.569518	0.586449	-0.0169308	0.439263	0.398426	0.0408373
cg00221961	0.0424908	0.0411366	0.00135421	0.279741	0.272667	0.00707352	0.0575265	0.0633879	-0.00586141	0.0723059	0.0542661	0.0180398
cg00227584	0.634884	0.644557	-0.00967224	0.628721	0.645768	-0.0170475	0.786588	0.791121	-0.00453277	0.589264	0.607796	-0.0185316
cg00228620	0.778176	0.788904	-0.0107283	0.475747	0.507145	-0.0313975	0.487513	0.477492	0.0100206	0.808122	0.805376	0.00274554
cg00230685	0.435595	0.442158	-0.0065632	0.314325	0.306672	0.00765386	0.571643	0.577102	-0.00545874	0.468037	0.488548	-0.020511
cg00231549	0.043289	0.0478704	-0.00458138	0.122541	0.104427	0.0181141	0.135903	0.0860553	0.0498482	0.0638047	0.0667162	-0.00291148
cg00235887	0.721104	0.731978	-0.0108734	0.917172	0.902383	0.014789	0.906491	0.909181	-0.00268995	0.678564	0.638348	0.0402163
cg00238052	0.472455	0.478174	-0.00571971	0.317469	0.301235	0.0162341	0.419896	0.412371	0.0075246	0.491559	0.477895	0.0136638
cg00238131	0.534491	0.55393	-0.0194392	0.269638	0.270275	-0.000637284	0.568038	0.553105	0.0149337	0.511113	0.514956	-0.00384311
cg00240113	0.493605	0.506878	-0.0132728	0.462138	0.437663	0.0244756	0.549203	0.554942	-0.00573921	0.528106	0.554069	-0.0259637
cg00241051	0.148213	0.151595	-0.00338215	0.601647	0.510553	0.0910934	0.435916	0.407296	0.0286203	0.744673	0.76505	-0.0203766
cg00242233	0.879284	0.851103	0.0281814	0.812755	0.797099	0.0156559	0.484862	0.49273	-0.00786799	0.846237	0.782926	0.0633108
cg00243747	0.122458	0.116963	0.00549497	0.485357	0.447519	0.0378382	0.0278127	0.0344414	-0.00662872	0.389553	0.399164	-0.00961124
cg00250879	0.0480296	0.0728017	-0.0247721	0.110407	0.0926144	0.017793	0.435269	0.40388	0.0313892	0.105479	0.101765	0.00371424
cg00253811	0.481809	0.450538	0.0312717	0.463919	0.479181	-0.0152621	0.719891	0.672976	0.0469155	0.464125	0.455152	0.00897297
cg00255219	0.103187	0.0849741	0.018213	0.373932	0.384827	-0.0108948	0.143035	0.118599	0.0244352	0.0889045	0.0730114	0.0158931
cg00256358	0.696986	0.674703	0.0222827	0.652512	0.637792	0.0147208	0.422495	0.415674	0.00682163	0.604235	0.613436	-0.00920063
cg00260448	0.125619	0.136657	-0.0110379	0.413628	0.401618	0.01201	0.162772	0.141533	0.0212386	0.0526401	0.0463511	0.00628902
cg00261039	0.212442	0.233068	-0.0206253	0.175586	0.163657	0.0119284	0.192486	0.220469	-0.0279823	0.320924	0.319933	0.0009913
cg00263759	0.812832	0.75455	0.0582827	0.886335	0.873107	0.0132287	0.810579	0.817284	-0.00670532	0.927731	0.902905	0.0248261
cg00264378	0.57421	0.573277	0.00093313	0.537611	0.555507	-0.0178958	0.310979	0.342261	-0.0312812	0.535626	0.550895	-0.015269
cg00267352	0.038639	0.0328062	0.00583273	0.0410977	0.027929	0.0131687	0.0443334	0.0462037	-0.0018703	0.168305	0.174245	-0.00594001
cg00267883	0.540762	0.49772	0.0430425	0.47969	0.450247	0.0294426	0.424638	0.451764	-0.0271261	0.534511	0.539158	-0.0046468
cg00271516	0.476849	0.463296	0.013553	0.500378	0.513795	-0.0134168	0.404165	0.410727	-0.00656217	0.477241	0.477241	9.75585e-09
cg00272286	0.796366	0.87062	-0.0742538	0.843971	0.824059	0.0199124	0.48462	0.487548	-0.00292759	0.841794	0.884272	-0.0424776
cg00279529	0.830234	0.844979	-0.0147452	0.793813	0.778437	0.0153761	0.649728	0.622721	0.0270062	0.600952	0.587967	0.0129855
cg00279797	0.401672	0.434252	-0.0325799	0.438557	0.455016	-0.0164592	0.620269	0.609844	0.0104254	0.247842	0.247099	0.000743242
cg00290944	0.33615	0.34287	-0.00672061	0.233017	0.231956	0.00106094	0.421277	0.416889	0.00438784	0.186283	0.180085	0.00619862
cg00291164	0.655764	0.62381	0.0319547	0.7431	0.742931	0.000168766	0.497296	0.4757	0.021596	0.232841	0.291567	-0.058726
cg00291929	0.72004	0.661643	0.0583967	0.690415	0.686683	0.00373183	0.625349	0.584531	0.0408183	0.677067	0.678512	-0.00144468
cg00292305	0.656352	0.658282	-0.00193003	0.689132	0.664693	0.0244384	0.496272	0.481323	0.0149492	0.589498	0.529382	0.0601159
cg00295573	0.197699	0.155215	0.0424842	0.583467	0.628857	-0.0453905	0.0983169	0.143969	-0.045652	0.338408	0.371502	-0.0330947
cg00304884	0.0773461	0.0839018	-0.00655563	0.128892	0.131402	-0.00251002	0.17613	0.182678	-0.00654799	0.138785	0.145886	-0.00710088
cg00321056	0.214267	0.232176	-0.0179093	0.0712004	0.0535345	0.0176659	0.349864	0.351612	-0.00174804	0.251294	0.231797	0.019497
cg00328965	0.429831	0.439054	-0.00922313	0.443991	0.448067	-0.00407589	0.560222	0.582598	-0.0223761	0.395775	0.410501	-0.0147253
cg00329040	0.502415	0.486302	0.0161131	0.546336	0.497274	0.0490621	0.453627	0.467011	-0.0133836	0.722868	0.750374	-0.0275065
cg00331433	0.0750512	0.0699306	0.00512063	0.148704	0.129874	0.0188304	0.158659	0.176241	-0.0175821	0.100967	0.0907255	0.0102418
cg00337921	0.146814	0.163275	-0.0164608	0.24222	0.242755	-0.000534114	0.758016	0.751244	0.00677204	0.407296	0.33923	0.0680657
cg00348113	0.181232	0.169549	0.0116838	0.0549336	0.0746639	-0.0197304	0.08148	0.0531614	0.0283186	0.253561	0.22056	0.0330015
cg00349460	0.588691	0.576214	0.0124776	0.735158	0.76469	-0.0295312	0.491964	0.497689	-0.00572512	0.688648	0.698094	-0.00944645
cg00358459	0.583154	0.64106	-0.0579061	0.587945	0.565261	0.0226847	0.515039	0.476818	0.0382207	0.711584	0.659706	0.0518775
cg00359973	0.0429702	0.0432203	-0.000250126	0.0660939	0.0643831	0.00171075	0.0672001	0.0691798	-0.00197968	0.044137	0.0506244	-0.00648749
cg00360298	0.290125	0.343643	-0.0535184	0.467615	0.489275	-0.0216598	0.386709	0.404069	-0.0173599	0.445266	0.469988	-0.0247227
cg00363318	0.485956	0.480336	0.00562051	0.134644	0.101496	0.0331481	0.581451	0.554157	0.0272943	0.0519572	0.0473032	0.00465397
cg00366674	0.534192	0.539225	-0.00503352	0.5901	0.527182	0.0629182	0.440975	0.441508	-0.0005333	0.684831	0.664693	0.0201373
cg00368230	0.40247	0.429387	-0.026917	0.384115	0.432035	-0.0479194	0.563768	0.575176	-0.0114079	0.401506	0.422374	-0.0208682
cg00369058	0.485081	0.469803	0.0152784	0.453372	0.459388	-0.0060164	0.452772	0.447808	0.00496408	0.303897	0.294507	0.00938991
cg00369477	0.431499	0.473188	-0.041689	0.510014	0.485521	0.0244937	0.555095	0.55236	0.00273492	0.349316	0.330506	0.0188098
cg00373606	0.560061	0.55718	0.00288142	0.56381	0.575081	-0.0112706	0.717661	0.725774	-0.00811274	0.531391	0.569839	-0.0384483
cg00374346	0.52555	0.532916	-0.00736537	0.730736	0.731627	-0.000891227	0.504992	0.511706	-0.00671367	0.787179	0.789499	-0.00231963
cg00375105	0.162397	0.190554	-0.0281571	0.538314	0.526927	0.011387	0.700405	0.683058	0.0173477	0.482045	0.482641	-0.000595602
cg00378473	0.410911	0.351515	0.059396	0.488587	0.511633	-0.0230457	0.0477418	0.0590943	-0.0113524	0.487231	0.457608	0.0296229
cg00378950	0.178204	0.186757	-0.00855288	0.251683	0.26276	-0.0110771	0.0446435	0.0501757	-0.00553224	0.108845	0.0936106	0.015234
cg00379371	0.0530398	0.0429618	0.010078	0.0987434	0.0986065	0.000136858	0.142837	0.113752	0.0290851	0.160848	0.166436	-0.00558841
cg00379799	0.322074	0.290083	0.0319907	0.0837743	0.0990068	-0.0152325	0.144504	0.107147	0.0373574	0.0897408	0.0986725	-0.00893166
cg00379983	0.590719	0.598385	-0.0076656	0.682559	0.696542	-0.0139824	0.444985	0.462355	-0.0173697	NA	0.478891	NA
cg00380985	0.623529	0.649962	-0.0264325	0.531108	0.543325	-0.0122169	0.714298	0.7442	-0.0299013	0.561099	0.58319	-0.0220909
cg00382651	0.117035	0.135596	-0.0185605	0.506874	0.487488	0.0193863	0.579149	0.587801	-0.00865225	0.479231	0.468061	0.0111708
cg00387056	0.119311	0.103321	0.0159907	0.15053	0.156359	-0.00582908	0.0243307	0.0236861	0.000644581	0.0463453	0.0576087	-0.0112634
cg00387940	0.381994	0.378613	0.00338108	0.394568	0.374288	0.0202798	0.34569	0.341178	0.00451231	0.0518551	0.0523921	-0.000537064
cg00389276	0.495136	0.498806	-0.00366963	0.794433	0.803993	-0.00956022	0.813921	0.793155	0.0207657	0.602623	0.62611	-0.023487
cg00389552	0.0944341	0.0909436	0.00349054	0.143431	0.14937	-0.00593904	0.442408	0.422433	0.0199747	0.258273	0.248063	0.0102092
cg00389918	0.836115	0.824897	0.0112178	0.757205	0.765414	-0.00820878	0.514037	0.48605	0.0279868	0.867977	0.844035	0.0239418
cg00390049	0.0739142	0.0684919	0.00542229	0.112822	0.133268	-0.0204461	0.577457	0.560887	0.0165696	0.150599	0.154628	-0.0040289
cg00391044	0.325038	0.315127	0.00991097	0.527017	0.541291	-0.0142736	0.293496	0.330581	-0.0370851	0.463978	0.494799	-0.0308212
cg00391379	0.241257	0.255229	-0.0139716	0.19183	0.178369	0.0134606	0.338757	0.347086	-0.00832869	0.157169	0.148811	0.00835823
cg00399450	0.618965	0.609232	0.00973323	0.571787	0.618603	-0.0468167	0.761376	0.781557	-0.0201808	0.600777	0.600009	0.000767794
cg00400665	0.147043	0.111073	0.0359701	0.468618	0.467353	0.00126534	0.50634	0.513136	-0.00679636	0.119736	0.119659	7.74295e-05
cg00406460	0.593196	0.647128	-0.0539322	0.573009	0.574811	-0.00180118	0.585954	0.646187	-0.0602325	0.897917	0.887991	0.00992572
cg00409000	0.574754	0.543901	0.0308534	0.645896	0.66574	-0.0198441	0.477641	0.47731	0.000331509	0.0645488	0.0689909	-0.00444216
cg00409480	0.710691	0.696259	0.0144326	0.721735	0.739266	-0.0175306	0.563991	0.560766	0.00322553	0.638707	0.642274	-0.00356766
cg00411843	0.0432319	0.0527984	-0.00956649	0.039468	0.0396817	-0.000213652	0.0365707	0.0403857	-0.00381499	0.109706	0.109735	-2.84438e-05
cg00412368	0.552818	0.543642	0.00917621	0.894277	0.901225	-0.00694816	0.855558	0.86408	-0.00852194	0.638031	0.645043	-0.0070118
cg00412554	0.233241	0.196931	0.0363094	0.143193	0.126838	0.0163554	0.435989	0.428231	0.00775803	0.624365	0.590734	0.033631
cg00416689	0.348016	0.314397	0.0336186	0.269237	0.264176	0.00506057	0.623546	0.661129	-0.0375835	0.462283	0.487779	-0.0254966
cg00419390	0.654075	0.656497	-0.00242148	0.633915	0.601297	0.032618	0.870471	0.834812	0.0356588	0.885906	0.849897	0.0360087
cg00422452	NA	0.146844	NA	0.0641297	0.0400377	0.024092	0.117495	0.108684	0.00881078	0.0958894	0.0842614	0.011628
cg00423014	0.598096	0.653032	-0.0549359	0.559842	0.634549	-0.074707	0.554443	0.558849	-0.00440587	0.47319	0.476141	-0.00295097
cg00426668	0.0256068	0.0232598	0.00234695	0.0236216	0.0272836	-0.00366193	0.029985	0.029741	0.000244005	0.0234485	0.0288357	-0.00538724
cg00427681	0.18063	0.158765	0.0218652	0.457726	0.435029	0.0226977	0.0483519	0.0641922	-0.0158402	0.53191	0.543429	-0.0115196
cg00428314	0.324431	0.288674	0.0357565	0.225763	0.218024	0.00773907	0.390894	0.380604	0.0102891	0.563731	0.552904	0.0108266
cg00433220	0.464916	0.481977	-0.0170604	0.459754	0.482641	-0.0228872	0.66963	0.720862	-0.0512322	0.482958	0.433368	0.0495902
cg00433890	0.76467	0.728754	0.035916	0.784288	0.783352	0.000936384	0.490984	0.472218	0.018766	0.539473	0.471583	0.0678896
cg00451631	0.468238	0.516809	-0.0485704	0.453464	0.465596	-0.0121329	0.884873	0.860825	0.024048	0.643275	0.661019	-0.0177439
cg00452819	0.457369	0.451893	0.00547592	0.377647	0.350053	0.0275942	0.230981	0.244481	-0.0134995	0.155973	0.146583	0.00939023
cg00459767	0.936503	0.936205	0.000298286	0.934195	0.949553	-0.0153574	0.958608	0.943384	0.0152239	0.940501	0.915542	0.024959
cg00466309	0.671731	0.631333	0.0403972	0.610687	0.629139	-0.0184523	0.785236	0.803228	-0.0179926	0.58963	0.596122	-0.00649201
cg00466819	0.535194	0.547696	-0.0125021	0.402217	0.419294	-0.0170763	0.39369	0.391037	0.00265336	0.23493	0.250703	-0.0157733
cg00467547	0.76942	0.754868	0.0145512	0.77381	0.760744	0.0130661	0.476313	0.491342	-0.0150288	0.750419	0.732236	0.0181833
cg00467854	0.0390665	0.0387119	0.000354619	0.131417	0.0863754	0.0450417	0.108089	0.116816	-0.00872639	0.0482319	0.0266879	0.021544
cg00473051	0.288944	0.286755	0.00218912	0.358506	0.328565	0.0299412	0.503822	0.499863	0.00395831	0.299353	0.266225	0.0331276
cg00481999	0.0802668	0.0752985	0.00496831	0.283144	0.284272	-0.00112818	0.0596983	0.0674606	-0.00776231	0.21985	0.238036	-0.0181857
cg00484111	0.171733	0.184218	-0.0124853	0.141964	0.145886	-0.00392169	0.200286	0.184372	0.0159132	0.26872	0.252798	0.0159216
cg00484940	0.52787	0.523666	0.00420415	0.487099	0.518479	-0.0313805	0.696491	0.695422	0.0010688	0.87357	0.894851	-0.0212807
cg00488364	0.0316294	0.039893	-0.00826359	0.0202154	0.0494071	-0.0291917	0.0484932	0.0609167	-0.0124236	0.0351298	0.0285142	0.00661559
cg00491350	0.509572	0.496833	0.0127393	0.223375	0.198504	0.0248712	0.383694	0.381306	0.00238839	0.660922	0.71821	-0.0572873
cg00497084	0.712329	0.675521	0.0368085	0.57847	0.580034	-0.00156351	0.3742	0.382336	-0.0081362	0.668303	0.715486	-0.0471835
cg00510327	0.83461	0.778472	0.0561383	0.636078	0.612354	0.0237239	0.538453	0.516823	0.0216305	0.632903	0.598598	0.0343047
cg00514746	0.139832	0.145546	-0.00571432	0.34162	0.326848	0.0147714	0.28271	0.277493	0.00521726	0.210518	0.179504	0.0310141
cg00517765	0.511978	0.478616	0.0333614	0.0905353	0.109626	-0.019091	0.307607	0.286351	0.0212563	0.523196	0.5241	-0.000904148
cg00523465	0.0692034	0.0821326	-0.0129292	0.164074	0.158163	0.00591152	0.171621	0.167574	0.00404735	0.0551525	0.0625964	-0.00744392
cg00524424	0.0610319	0.0669124	-0.00588051	0.440719	0.404177	0.0365424	0.0997198	0.109438	-0.00971775	0.0751982	0.0634025	0.0117957
cg00525383	0.838351	0.831219	0.00713212	0.852523	0.831709	0.0208137	0.88597	0.880112	0.00585779	0.580705	0.610612	-0.0299065
cg00536175	0.506666	0.444133	0.062533	0.715785	0.71936	-0.00357476	0.136707	0.103582	0.0331246	0.522919	0.415328	0.107591
cg00538420	0.153138	0.131535	0.0216032	0.0972497	0.0647455	0.0325042	0.241126	0.249152	-0.00802622	0.125882	0.126254	-0.000371864
cg00543604	0.883144	0.862197	0.0209475	0.864115	0.890805	-0.0266895	0.915434	0.912133	0.00330161	0.897603	0.893389	0.00421352
cg00547789	0.144835	0.151143	-0.00630822	0.159088	0.16206	-0.00297151	0.281144	0.286517	-0.00537379	0.401908	0.392416	0.00949205
cg00550141	0.886595	0.910522	-0.0239272	0.904734	0.896462	0.00827133	0.485631	0.473012	0.0126188	0.772702	0.741367	0.0313356
cg00553200	0.0885261	0.0866599	0.00186611	0.0869357	0.0842614	0.00267435	0.10037	0.135939	-0.0355685	0.0742908	0.0760409	-0.00175016
cg00570097	0.828946	0.845959	-0.0170133	0.799032	0.809071	-0.0100394	0.841156	0.852455	-0.0112983	0.816808	0.799491	0.0173169
cg00571700	0.877878	0.865284	0.0125941	0.844755	0.830101	0.0146538	0.874658	0.871227	0.00343025	0.826615	0.85374	-0.0271246
cg00573298	0.21254	0.254736	-0.0421962	0.028361	0.0363164	-0.0079554	0.0488178	0.0283574	0.0204604	0.0266864	0.0353153	-0.00862883
cg00577623	0.538193	0.519748	0.0184452	0.615601	0.619847	-0.00424641	0.476747	0.488257	-0.0115098	0.614246	0.55874	0.055506
cg00578645	0.141305	0.128265	0.0130398	0.312638	0.310239	0.00239876	0.0749884	0.0414895	0.0334989	0.220647	0.228457	-0.0078095
cg00581583	0.303929	0.309369	-0.00543931	0.377846	0.376928	0.000918853	0.342791	0.337402	0.00538895	0.228025	0.253977	-0.0259526
cg00582864	0.528916	0.50812	0.0207961	0.687308	0.687099	0.000208933	0.457536	0.453383	0.0041529	0.458444	0.464702	-0.00625793
cg00583858	0.0404228	0.0319916	0.00843127	0.0454738	0.0403601	0.00511365	0.0794391	0.0810826	-0.00164353	0.0425174	0.0277497	0.0147677
cg00584971	0.423236	0.46169	-0.0384539	0.46415	0.488884	-0.0247342	0.634842	0.654213	-0.0193718	0.54369	0.52458	0.0191093
cg00586321	0.897679	0.894495	0.00318343	0.880956	0.887991	-0.00703488	0.881572	0.894091	-0.0125195	0.863847	0.879719	-0.0158725
cg00592494	0.118322	0.109477	0.00884496	0.164938	0.144901	0.0200367	0.0625736	0.047923	0.0146507	0.0971953	0.0807477	0.0164476
cg00594844	0.822044	0.828875	-0.00683175	0.785939	0.769992	0.0159466	0.836601	0.821023	0.0155782	0.71745	0.72088	-0.0034303
cg00595697	0.937911	0.93975	-0.00183822	0.900838	0.933955	-0.0331169	0.938988	0.929876	0.00911257	0.944429	0.916573	0.0278553
cg00596686	0.228386	0.217791	0.0105953	0.0650398	0.09285	-0.0278102	0.177971	0.137639	0.040332	0.849911	0.870062	-0.0201512
cg00603890	0.524583	0.511991	0.012592	0.0754765	0.090753	-0.0152765	0.64065	0.649757	-0.00910687	0.481889	0.527224	-0.0453345
cg00606069	0.909537	0.8903	0.0192373	0.887986	0.888487	-0.000500213	0.885885	0.869342	0.0165431	0.901632	0.873943	0.0276892
cg00607036	0.430425	0.449877	-0.0194516	0.424249	0.457027	-0.0327784	0.479181	0.481506	-0.00232516	0.38328	0.361938	0.021342
cg00608151	0.585999	0.561065	0.024934	0.723925	0.717685	0.00623964	0.58886	0.57566	0.0132005	0.143107	0.143402	-0.000294488
cg00609239	0.678725	0.683646	-0.00492056	0.565453	0.596396	-0.0309433	0.746945	0.657209	0.0897363	0.62235	0.627947	-0.00559734
cg00612628	0.836191	0.811943	0.0242482	0.819552	0.826576	-0.00702374	0.592829	0.57847	0.0143595	0.809725	0.804861	0.00486332
cg00614938	0.427128	0.444916	-0.0177879	0.048665	0.0306355	0.0180295	0.0426514	0.0394198	0.00323167	0.484822	0.427955	0.0568673
cg00615010	0.0451524	0.0581983	-0.0130458	0.040753	0.0532408	-0.0124878	0.0250457	0.0508097	-0.025764	0.0505422	0.0444264	0.00611579
cg00615738	0.122668	0.0953626	0.0273052	0.0673945	0.129089	-0.0616949	0.101321	0.19227	-0.0909491	0.0702963	0.0991739	-0.0288776
cg00615794	0.0297681	0.0242189	0.00554919	0.0258175	0.0194997	0.00631785	0.0223196	0.0288318	-0.00651224	0.0313668	0.0243296	0.00703722
cg00618396	0.494773	0.508934	-0.0141606	0.48602	0.502281	-0.0162609	0.418865	0.444224	-0.0253587	0.483285	0.465438	0.0178468
cg00619443	0.704492	0.746231	-0.0417399	0.123192	0.149179	-0.0259868	0.652995	0.711062	-0.0580672	0.611846	0.661491	-0.0496449
cg00620602	0.641314	0.606882	0.034432	0.718488	0.71936	-0.000871996	0.812327	0.801536	0.0107913	0.76048	0.749702	0.0107788
cg00621925	0.12138	0.117142	0.00423826	0.252885	0.221998	0.0308867	0.75986	0.795345	-0.0354852	0.190371	0.195697	-0.00532642
cg00622389	0.0608935	0.0606932	0.000200326	0.0692653	0.087558	-0.0182927	0.221711	0.19153	0.0301803	0.136101	0.163389	-0.0272873
cg00623388	0.637516	0.649	-0.0114844	0.613394	0.660863	-0.0474697	0.792135	0.802866	-0.0107315	0.60289	0.596961	0.00592962
cg00625743	0.3575	0.305069	0.0524309	0.24462	0.244131	0.000488187	0.371231	0.374329	-0.00309788	0.468755	0.486572	-0.0178162
cg00625841	0.0902993	0.0889503	0.00134898	0.198326	0.178155	0.0201705	0.235719	0.2178	0.0179185	0.127074	0.134158	-0.00708386
cg00632130	0.745786	0.751852	-0.00606593	0.741606	0.742535	-0.000928729	0.412311	0.394706	0.0176055	0.38596	0.360536	0.0254238
cg00632374	0.494562	0.476792	0.0177701	0.456201	0.452918	0.00328274	0.285184	0.296877	-0.0116938	0.425419	0.415841	0.00957764
cg00634642	0.47344	0.487783	-0.0143425	0.437781	0.452138	-0.0143564	0.592097	0.68165	-0.0895538	0.175392	0.174532	0.000860141
cg00636562	0.184002	0.229268	-0.0452661	0.304617	0.313448	-0.0088317	0.499463	0.530867	-0.0314042	0.263626	0.294353	-0.0307273
cg00644637	0.723703	0.711452	0.0122507	0.088396	0.122653	-0.0342569	0.535932	0.506584	0.0293472	0.679019	0.704064	-0.025045
cg00645049	0.598313	0.612209	-0.0138962	0.591859	0.621581	-0.0297217	0.734362	0.748006	-0.0136437	0.555175	0.619787	-0.0646118
cg00646140	0.497618	0.495351	0.00226678	0.196022	0.191391	0.00463106	0.606277	0.621929	-0.0156517	0.195457	0.199987	-0.0045302
cg00646659	0.615835	0.597333	0.0185017	0.343403	0.333732	0.00967175	0.789125	0.74959	0.039535	0.58482	0.621067	-0.0362469
cg00648125	0.126415	0.135982	-0.00956724	0.0822539	0.109531	-0.0272772	0.331776	0.313407	0.0183692	0.170047	0.148097	0.0219505
cg00658396	0.0538317	0.0483543	0.00547745	0.235719	0.237643	-0.00192381	0.12337	0.103582	0.0197877	0.0716368	0.065681	0.00595576
cg00661180	0.553312	0.567423	-0.0141105	0.301269	0.311147	-0.0098778	0.937924	0.944429	-0.00650439	0.141533	0.125455	0.0160784
cg00667781	0.558314	0.542919	0.0153955	0.56248	0.604867	-0.0423875	0.744573	0.671095	0.073478	0.516788	0.549409	-0.0326211
cg00668694	0.0338541	0.044869	-0.0110149	0.0400865	0.0610051	-0.0209186	0.0511103	0.0510404	6.98713e-05	0.0405399	0.0446416	-0.00410179
cg00673020	0.503094	0.493131	0.00996265	0.49114	0.512625	-0.0214853	0.602294	0.629401	-0.0271073	0.814411	0.816773	-0.00236166
cg00673685	0.0370983	0.0367476	0.000350658	0.0421077	0.043278	-0.00117036	0.0333411	0.0495866	-0.0162455	0.0257744	0.0275016	-0.00172714
cg00679726	0.504471	0.547583	-0.0431115	0.539637	0.522286	0.017351	0.656709	0.620751	0.0359583	0.517827	0.495787	0.0220403
cg00685229	0.761165	0.76732	-0.00615489	0.55199	0.549524	0.0024651	0.488225	0.50242	-0.0141949	0.670684	0.679146	-0.00846222
cg00685925	0.424892	0.411277	0.0136152	0.561093	0.6044	-0.0433071	0.659008	0.705784	-0.0467766	0.494616	0.5979	-0.103284
cg00690049	0.143837	0.156105	-0.0122676	0.16509	0.139729	0.0253618	0.255935	0.253347	0.00258788	0.131468	0.134604	-0.00313642
cg00692892	0.500503	0.495016	0.00548758	0.664787	0.665496	-0.000708807	0.118226	0.147837	-0.0296112	0.448006	0.405807	0.0421984
cg00694968	0.710304	0.773793	-0.0634895	0.646099	0.629896	0.0162034	0.512667	0.481261	0.0314064	0.723272	0.744899	-0.0216267
cg00695046	0.114877	0.10026	0.0146174	0.557785	0.482984	0.0748009	0.364032	0.361997	0.00203562	0.623944	0.605142	0.0188017
cg00705055	0.720177	0.652408	0.0677689	0.73544	0.705701	0.0297382	0.527467	0.530741	-0.00327464	0.746325	0.707711	0.0386141
cg00713642	0.865226	0.845708	0.0195184	0.893108	0.878492	0.0146164	0.874898	0.896065	-0.0211667	0.765544	0.754766	0.0107779
cg00714323	0.953245	0.948977	0.00426841	0.939752	0.93191	0.00784129	0.956068	0.928238	0.0278297	0.948986	0.936803	0.0121833
cg00715011	0.0626763	0.058495	0.00418133	0.0863932	0.0527543	0.0336389	0.0962796	0.088669	0.00761062	0.351233	0.330743	0.0204898
cg00718129	0.574138	0.552792	0.0213462	0.634842	0.60022	0.0346219	0.470933	0.450718	0.0202149	0.586075	0.57111	0.0149646
cg00718858	0.875883	0.869891	0.00599231	0.804366	0.787288	0.0170782	0.837342	0.809807	0.0275354	0.824972	0.842622	-0.0176499
cg00719224	0.780917	0.773024	0.00789284	0.788573	0.776406	0.0121669	0.424295	0.415061	0.00923427	0.745586	0.73577	0.00981621
cg00722467	0.709217	0.721342	-0.012125	0.730087	0.715753	0.0143339	0.637596	0.660787	-0.0231913	0.657476	0.659113	-0.00163681
cg00723034	0.285107	0.281575	0.0035322	0.35201	0.347519	0.00449098	0.445865	0.470809	-0.024944	0.135326	0.14194	-0.00661453
cg00724728	0.605893	0.626565	-0.0206718	0.258413	0.247923	0.0104903	0.193082	0.201899	-0.0088172	0.68841	0.727855	-0.039445
cg00725777	0.383495	0.28637	0.0971259	0.477544	0.455586	0.0219585	0.273941	0.289119	-0.0151786	0.276929	0.256073	0.0208561
cg00725912	0.187174	0.214992	-0.0278178	0.497189	0.49124	0.00594854	0.325932	0.329133	-0.00320154	0.122033	0.128568	-0.00653467
cg00730224	0.512294	0.504807	0.00748745	0.223742	0.238853	-0.0151112	0.377437	0.368321	0.00911657	0.402056	0.387374	0.0146828
cg00735876	0.645268	0.680141	-0.0348728	0.619746	0.603794	0.0159521	0.776903	0.792983	-0.0160809	0.714374	0.677863	0.0365109
cg00735885	0.0849263	0.0743677	0.0105585	0.0595509	0.0562045	0.00334636	0.0625979	0.0532975	0.00930037	0.308698	0.304173	0.00452496
cg00738702	0.583553	0.594169	-0.0106164	0.604052	0.569214	0.0348383	0.454307	0.470326	-0.016019	0.513709	0.521482	-0.00777285
cg00739582	0.149315	0.144001	0.00531417	0.203271	0.209019	-0.00574747	0.188449	0.161875	0.0265741	0.220136	0.204057	0.0160789
cg00739787	0.599867	0.592292	0.0075757	0.635359	0.662703	-0.0273432	0.788929	0.808122	-0.0191926	0.629076	0.611388	0.017688
cg00741717	0.489488	0.487277	0.00221094	0.754575	0.733428	0.0211461	0.326736	0.320255	0.00648076	0.737617	0.743131	-0.00551476
cg00742240	0.639787	0.717287	-0.0774991	0.687488	0.694947	-0.00745856	0.51195	0.492177	0.0197728	0.583734	0.611904	-0.0281697
cg00743068	0.402127	0.383045	0.0190819	0.317014	0.326366	-0.00935239	0.458231	0.463406	-0.00517443	0.139548	0.1406	-0.00105254
cg00743412	0.55726	0.573843	-0.0165836	0.574448	0.582713	-0.00826539	0.859357	0.838968	0.0203883	0.170848	0.167517	0.0033306
cg00745293	0.523839	0.554988	-0.0311488	0.516704	0.526642	-0.00993824	0.614389	0.59212	0.0222693	0.490771	0.506056	-0.0152854
cg00748144	0.670927	0.672986	-0.00205829	0.747344	0.725662	0.0216821	0.660555	0.679975	-0.0194198	0.845749	0.842831	0.00291868
cg00750740	0.49126	0.50243	-0.01117	0.726484	0.737361	-0.010877	0.671646	0.620359	0.0512872	0.498541	0.421411	0.0771297
cg00752874	0.104418	0.107777	-0.00335906	0.0500567	0.0431205	0.00693618	0.129506	0.118103	0.0114026	0.101725	0.0890355	0.0126892
cg00757453	0.284677	0.307728	-0.0230509	0.501879	0.447263	0.0546162	0.379278	0.364453	0.0148256	0.477148	0.431695	0.045453
cg00763907	0.915067	0.91699	-0.00192304	0.935974	0.904882	0.0310923	0.910892	0.90688	0.00401124	0.91509	0.930076	-0.014986
cg00765686	0.0785614	0.0831385	-0.00457712	0.151557	0.1382	0.0133573	0.133374	0.0652126	0.0681613	0.225363	0.210367	0.0149963
cg00765885	0.38779	0.379148	0.00864124	0.455052	0.509811	-0.0547594	0.851109	0.831559	0.0195501	0.464809	0.462754	0.00205489
cg00768158	0.608085	0.647445	-0.03936	0.751958	0.75068	0.0012777	0.750923	0.799368	-0.0484453	0.429641	0.43452	-0.00487876
cg00768439	0.178729	0.17535	0.00337944	0.128065	0.12578	0.00228516	0.254919	0.242698	0.0122207	0.39132	0.394899	-0.00357817
cg00771185	0.68464	0.712903	-0.028263	0.673013	0.518179	0.154834	0.852144	0.830224	0.0219194	0.812399	0.753807	0.0585915
cg00772918	0.853353	0.835745	0.0176085	0.845718	0.825347	0.0203706	0.857981	0.86737	-0.0093891	0.785272	0.766392	0.0188804
cg00775115	0.221317	0.205825	0.0154926	0.426858	0.443391	-0.0165334	0.500622	0.5161	-0.0154779	0.379987	0.376518	0.00346942
cg00775286	0.889046	0.900995	-0.0119495	0.641523	0.637119	0.0044038	0.877403	0.850818	0.0265855	0.754817	0.70278	0.052037
cg00779763	0.618611	0.597476	0.021135	0.59356	0.629261	-0.0357007	0.775351	0.753712	0.0216392	0.589814	0.575205	0.0146091
cg00780578	0.396943	0.386962	0.00998155	0.313128	0.314463	-0.00133504	0.326401	0.321311	0.00509085	0.196963	0.187108	0.009855
cg00781047	0.308888	0.296916	0.011972	0.210098	0.197781	0.0123169	0.39544	0.389828	0.00561209	0.245129	0.240642	0.0044874
cg00781978	0.133698	0.133394	0.000304836	0.0580828	0.0518643	0.00621849	0.0789703	0.0788431	0.000127202	0.0561119	0.0581293	-0.00201739
cg00785877	0.667177	0.683523	-0.016345	0.46903	0.432782	0.0362478	0.450765	0.434101	0.0166646	0.431036	0.375096	0.0559392
cg00787015	0.22747	0.231014	-0.00354367	0.140074	0.150968	-0.0108941	0.192945	0.197211	-0.00426622	0.0862516	0.0872448	-0.000993178
cg00788815	0.233433	0.164275	0.0691585	0.434065	0.402505	0.0315607	0.525547	0.540234	-0.0146865	0.610142	0.638752	-0.02861
cg00790086	0.469132	0.489151	-0.020019	0.474304	0.482936	-0.00863216	0.624789	0.651719	-0.0269296	0.48605	0.487378	-0.00132798
cg00799224	0.488091	0.47257	0.0155208	0.519094	0.51222	0.00687372	0.621812	0.616511	0.00530125	0.173881	0.189718	-0.0158371
cg00800095	0.904563	0.902427	0.0021354	0.877907	0.884885	-0.00697786	0.89199	0.896324	-0.00433329	0.890709	0.89177	-0.00106095
cg00803922	0.604476	0.600446	0.0040297	0.591061	0.539506	0.0515555	0.751479	0.734564	0.0169148	0.658357	0.695293	-0.036936
cg00804510	0.813162	0.831627	-0.0184649	0.45995	0.478794	-0.0188438	0.49523	0.513977	-0.0187466	0.381306	0.429316	-0.0480103
cg00805116	0.391817	0.360227	0.0315908	0.575659	0.589197	-0.0135375	0.239081	0.256159	-0.0170787	0.579957	0.544298	0.0356589
cg00805156	0.0407669	0.0321349	0.00863201	0.0533215	0.0538561	-0.000534541	0.0451388	0.0420954	0.0030434	0.0307098	0.0236209	0.00708882
cg00809111	0.194284	0.188096	0.00618738	0.475611	0.464965	0.0106462	0.519307	0.528387	-0.0090804	0.451238	0.462279	-0.0110412
cg00810883	0.311897	0.351663	-0.039766	0.140858	0.141578	-0.00072031	0.41391	0.419955	-0.00604549	0.343253	0.345797	-0.0025439
cg00812293	0.908545	0.898666	0.00987886	0.926965	0.930251	-0.00328677	0.535608	0.502024	0.0335835	0.933601	0.92018	0.0134219
cg00812634	0.93307	0.933457	-0.000386897	0.970955	0.970957	-1.89965e-06	0.95717	0.966831	-0.00966075	0.920028	0.8988	0.0212285
cg00813765	0.299255	0.315701	-0.0164469	0.383484	0.372037	0.0114476	0.404985	0.413342	-0.00835645	0.296057	0.267357	0.0286999
cg00813999	0.426532	0.388769	0.0377625	0.0280259	0.032374	-0.00434807	0.539258	0.52426	0.0149977	0.391727	NA	NA
cg00815013	0.0794843	0.0903959	-0.0109115	0.490747	0.44102	0.0497268	0.0827081	0.081191	0.00151711	0.054023	0.0646941	-0.0106711
cg00816548	0.373762	0.404593	-0.0308309	0.334873	0.342451	-0.00757789	0.501904	0.500959	0.000945032	0.366496	0.342337	0.0241597
cg00819012	0.680795	0.674556	0.00623932	0.705863	0.703735	0.00212734	0.0886581	0.0457134	0.0429447	0.402322	0.3971	0.00522192
cg00820131	0.82262	0.824379	-0.00175933	0.845457	0.856426	-0.0109689	0.877814	0.889099	-0.0112849	0.711186	0.722822	-0.011636
cg00822942	0.670225	0.699796	-0.0295708	0.783493	0.795487	-0.0119944	0.200566	0.171692	0.028874	0.684009	0.666009	0.0179999
cg00822998	0.533381	0.497423	0.0359584	0.210704	0.22439	-0.0136859	0.101959	0.164065	-0.0621063	0.58383	0.597551	-0.013721
cg00823357	0.200651	0.217941	-0.0172906	0.243847	0.236108	0.00773938	0.752264	0.717733	0.034531	0.591383	0.606475	-0.0150916
cg00825441	0.465698	0.48233	-0.0166314	0.101785	0.10807	-0.00628539	0.614478	0.610142	0.00433536	0.422786	0.464804	-0.0420178
cg00829575	0.493446	0.489349	0.00409648	0.491465	0.530114	-0.0386488	0.530464	0.536968	-0.00650461	0.441508	0.461831	-0.020323
cg00831032	0.49011	0.50378	-0.0136695	0.449533	0.437831	0.011702	0.294792	0.298622	-0.00382998	0.482381	0.460361	0.0220202
cg00832136	0.0809409	0.0674016	0.0135393	0.0878519	0.128991	-0.041139	0.138629	0.183118	-0.0444881	0.533093	0.518254	0.0148387
cg00834229	0.451015	0.456466	-0.00545073	0.505079	0.515255	-0.0101758	0.290349	0.279503	0.0108469	0.456163	0.472362	-0.0161985
cg00839572	0.034599	0.0333918	0.00120719	0.0488638	0.0489242	-6.03415e-05	0.0552165	0.141905	-0.0866885	0.0299793	0.0536989	-0.0237196
cg00839869	0.584827	0.537624	0.0472031	0.652219	0.605005	0.0472136	0.513945	0.49534	0.0186051	0.577618	0.601693	-0.024075
cg00850648	0.329335	0.361892	-0.0325571	0.611346	0.645242	-0.0338956	0.766365	0.761584	0.00478115	0.369608	0.330261	0.0393467
cg00854925	0.436607	0.446171	-0.00956352	0.700991	0.671984	0.0290075	0.45692	0.453963	0.00295676	0.67981	0.691701	-0.0118902
cg00854963	0.242306	0.246818	-0.00451184	0.61623	0.608362	0.00786729	0.780184	0.760114	0.0200694	0.568331	0.584312	-0.015981
cg00855706	0.871033	0.846045	0.0249874	0.76487	0.776076	-0.0112062	0.879617	0.879055	0.000561887	0.806245	0.817027	-0.0107814
cg00855923	0.80219	0.825643	-0.0234524	0.647611	0.62808	0.0195311	0.530647	0.532505	-0.00185822	0.815847	0.814367	0.00147983
cg00861899	0.11001	0.119913	-0.00990364	0.0719927	0.0836499	-0.0116572	0.32937	0.330147	-0.000776271	0.297296	0.286843	0.0104533
cg00868980	0.850884	0.832094	0.0187891	0.878735	0.850224	0.0285113	0.47744	0.44873	0.0287099	0.857603	0.852614	0.0049889
cg00869298	0.530691	0.593299	-0.0626075	0.361843	0.36299	-0.00114681	0.134679	0.164868	-0.0301892	0.317029	0.309083	0.00794592
cg00874863	0.508233	0.538406	-0.0301725	0.552352	0.545727	0.00662494	0.473383	0.479968	-0.00658498	0.596789	0.55529	0.0414992
cg00877056	0.0456614	0.0440923	0.00156913	0.0903386	0.0652451	0.0250935	0.163424	0.110778	0.0526464	0.0628766	0.0579438	0.00493279
cg00877150	0.764174	0.731171	0.0330024	0.530274	0.512298	0.0179761	0.187765	0.145828	0.0419365	0.51716	0.471245	0.0459148
cg00878023	0.659872	0.658683	0.0011896	0.541138	0.563271	-0.0221329	0.785467	0.764961	0.0205067	0.618909	0.614297	0.00461257
cg00883449	0.514659	0.500964	0.0136948	0.508583	0.535476	-0.0268929	0.626323	0.616217	0.0101062	0.507353	0.505672	0.00168181
cg00898159	0.870898	0.815911	0.0549873	0.849732	0.826071	0.0236611	0.441351	0.437374	0.00397725	0.817074	0.850751	-0.033677
cg00901211	0.152239	0.15232	-8.11787e-05	0.311579	0.31743	-0.00585131	0.353798	0.350827	0.00297034	0.378944	0.406574	-0.0276302
cg00901375	0.669651	0.671618	-0.0019666	0.525465	0.488671	0.0367942	0.632833	0.628141	0.00469279	0.502573	0.475823	0.0267501
cg00901393	0.726461	0.712328	0.0141327	0.796729	0.811842	-0.0151124	0.872005	0.869906	0.00209832	0.819063	0.817926	0.00113664
cg00902308	0.0801426	0.0822643	-0.00212167	0.33538	0.352154	-0.016774	0.259516	0.251704	0.00781173	0.079316	0.0921022	-0.0127862
cg00904184	0.513453	0.51302	0.000432958	0.363703	0.35253	0.0111722	0.655637	0.6392	0.0164365	0.502024	0.561806	-0.0597821
cg00908601	0.0430867	0.0447021	-0.00161532	0.0543394	0.0856934	-0.031354	0.182412	0.203019	-0.0206066	0.0465086	0.0467034	-0.000194719
cg00909097	0.58928	0.583705	0.00557476	0.592214	0.546002	0.0462123	0.446322	0.433259	0.0130622	0.647168	0.656965	-0.00979682
cg00910720	0.35354	0.390947	-0.0374067	0.0375197	0.0550875	-0.0175678	0.439525	0.441712	-0.00218674	0.116591	0.110637	0.00595441
cg00911398	0.478329	0.464889	0.0134399	0.397578	0.419011	-0.0214323	0.394568	0.381616	0.0129517	0.248149	0.261157	-0.0130081
cg00914218	0.563208	0.569412	-0.00620429	0.595465	0.633057	-0.0375914	0.766212	0.7597	0.00651222	0.595497	0.587669	0.00782797
cg00920314	0.59152	0.595274	-0.00375405	0.393632	0.369378	0.0242543	0.148385	0.159554	-0.0111689	0.326745	0.328875	-0.0021297
cg00920960	0.0781461	0.0791526	-0.00100647	0.0735155	0.0921022	-0.0185866	0.163807	0.142894	0.0209126	0.0449204	0.0562918	-0.0113714
cg00926894	0.803017	0.797048	0.00596842	0.201126	0.211283	-0.0101568	0.813409	0.821824	-0.008415	0.84242	0.861848	-0.0194281
cg00928753	0.189277	0.186422	0.0028552	0.186141	0.18894	-0.0027988	0.366933	0.368753	-0.00181989	0.236379	0.247923	-0.0115435
cg00933162	0.712701	0.713101	-0.000399592	0.577718	0.551458	0.0262602	0.718885	0.686077	0.0328071	0.54433	0.548797	-0.004467
cg00934057	0.708397	0.673162	0.0352351	0.631976	0.605705	0.0262709	0.524242	0.535529	-0.011287	0.553105	0.563907	-0.0108024
cg00935394	0.25943	0.261082	-0.00165174	0.345314	0.338836	0.00647871	0.175041	0.142686	0.0323547	0.329133	0.34158	-0.0124471
cg00936342	0.396431	0.41012	-0.0136889	0.449385	0.445944	0.00344095	0.539564	0.548761	-0.0091964	0.330378	0.33322	-0.00284202
cg00936349	0.404578	0.412777	-0.0081988	0.37847	0.365144	0.013326	0.467869	0.452381	0.0154878	0.387205	0.379382	0.00782275
cg00937263	0.471194	0.500678	-0.029484	0.496146	0.498798	-0.0026524	0.452857	0.460013	-0.00715527	0.455714	0.477459	-0.0217446
cg00938039	0.485363	0.492984	-0.00762089	0.415278	0.400874	0.014404	0.108089	0.0722797	0.0358095	0.357253	0.410817	-0.0535647
cg00938641	0.602426	0.581723	0.0207028	0.524242	0.525353	-0.00111055	0.463667	0.456163	0.00750418	0.684635	0.708222	-0.0235869
cg00940232	0.32711	0.35401	-0.0269003	0.425847	0.429132	-0.00328498	0.539959	0.54635	-0.00639103	0.382736	0.430523	-0.0477864
cg00941549	0.70478	0.664479	0.0403012	0.555697	0.54986	0.00583685	0.491857	0.514889	-0.0230324	0.754654	0.78057	-0.0259158
cg00947275	0.113674	0.119336	-0.00566178	0.224872	0.228457	-0.00358435	0.56892	0.544275	0.0246455	0.433259	0.405983	0.0272761
cg00948677	0.0804909	0.0667208	0.0137702	0.0445057	0.0662396	-0.0217339	0.0509571	0.0710266	-0.0200696	0.0501757	0.0415654	0.00861036
cg00953793	0.131877	0.15268	-0.0208026	0.406744	0.406855	-0.000110708	0.652613	0.605866	0.046747	0.442187	0.471443	-0.0292557
cg00958651	0.495243	0.504851	-0.00960824	0.676955	0.683073	-0.00611817	0.756969	0.755125	0.00184424	0.652466	0.662816	-0.0103503
cg00960300	0.189847	0.155101	0.0347457	0.122994	0.143159	-0.0201651	0.177207	0.155722	0.0214854	0.160046	0.163789	-0.00374289
cg00960898	0.446459	0.450705	-0.00424635	0.540328	0.557417	-0.0170887	0.511088	0.532792	-0.0217042	0.470253	0.48348	-0.0132273
cg00962635	0.318503	0.233807	0.0846965	0.324238	0.321211	0.0030263	0.182701	0.19467	-0.0119685	0.178225	0.162367	0.0158583
cg00962799	0.673132	0.690554	-0.0174222	0.680021	0.66866	0.0113611	0.663918	0.647272	0.0166461	0.630621	0.616255	0.0143656
cg00966524	0.496801	0.518956	-0.0221547	0.46239	0.440568	0.0218219	0.41377	0.414034	-0.0002647	0.674689	0.660428	0.0142615
cg00968475	0.466174	0.421483	0.0446915	0.254333	0.256391	-0.00205716	0.202968	0.183887	0.019081	0.474153	0.452859	0.0212939
cg00969573	0.367354	0.395923	-0.0285693	0.4451	0.411541	0.0335591	0.334873	0.334667	0.000205652	0.442684	0.419862	0.0228224
cg00981643	0.367519	0.339196	0.0283228	0.193082	0.188219	0.00486263	0.356394	0.353798	0.00259511	0.122427	0.118129	0.00429892
cg00994038	0.427448	0.438075	-0.0106272	0.393793	0.431286	-0.0374933	0.561093	0.559848	0.00124445	0.0936029	0.105638	-0.0120349
cg00997174	0.261644	0.272827	-0.0111834	0.460438	0.500407	-0.039969	0.353126	0.353126	-6.40785e-07	0.3838	0.409302	-0.0255027
cg01000789	0.112891	0.0979044	0.0149866	0.522902	0.561404	-0.0385017	0.32658	0.339459	-0.0128787	0.163483	0.191391	-0.0279076
cg01001959	0.117943	0.110673	0.00726974	0.237073	0.240449	-0.00337619	0.195413	0.164315	0.031098	0.368949	0.381726	-0.0127765
cg01003197	0.564705	0.593696	-0.0289906	0.611562	0.618094	-0.00653141	0.703487	0.716801	-0.0133141	0.614144	0.61955	-0.00540593
cg01004447	0.841447	0.852517	-0.0110697	0.865116	0.853629	0.0114868	0.860185	0.838311	0.0218746	0.879216	0.841897	0.0373186
cg01004805	0.281202	0.237706	0.0434956	0.182412	0.160742	0.0216702	0.271025	0.263098	0.00792785	0.0771118	0.0774509	-0.000339183
cg01005760	0.531116	0.544016	-0.0129	0.360773	0.326693	0.03408	0.498666	0.521697	-0.0230312	0.502841	0.531924	-0.0290828
cg01008082	0.743741	0.706061	0.0376806	0.835892	0.877472	-0.0415804	0.859207	0.847768	0.0114386	0.892944	0.876089	0.0168555
cg01008919	0.590494	0.529119	0.0613744	0.664283	0.666009	-0.00172601	0.220413	0.169052	0.0513608	0.14774	0.132964	0.0147756
cg01010618	0.514471	0.563182	-0.0487107	0.187495	0.201255	-0.0137598	0.163944	0.152368	0.0115757	0.251595	0.228179	0.0234159
cg01019600	0.477544	0.458631	0.0189131	0.345544	0.338175	0.00736899	0.385537	0.401418	-0.0158804	0.336888	0.346362	-0.00947347
cg01022618	0.532101	0.520525	0.0115762	0.826788	0.831136	-0.00434834	0.844379	0.850818	-0.00643873	0.538022	0.513011	0.0250108
cg01024350	0.65104	0.637385	0.0136552	0.598812	0.595957	0.00285553	0.554141	0.528865	0.0252764	0.744059	0.69422	0.0498385
cg01037726	0.0602366	0.0488197	0.0114169	0.103151	0.0927063	0.010445	0.0786195	0.0856226	-0.00700309	0.0422744	0.0493778	-0.0071034
cg01039990	0.393818	0.382432	0.0113865	0.396921	0.416812	-0.0198908	0.520409	0.523631	-0.00322142	0.679975	0.70623	-0.0262547
cg01044189	0.751291	0.732811	0.0184802	0.86197	0.87231	-0.0103404	0.441071	0.480191	-0.0391207	0.548395	0.522215	0.0261797
cg01054612	0.865884	0.857074	0.00880996	0.912121	0.900609	0.0115122	0.886335	0.884044	0.00229165	0.868706	0.878981	-0.0102751
cg01056373	0.441025	0.446378	-0.00535249	0.465524	0.510286	-0.044762	0.742514	0.786478	-0.043964	0.530487	0.500293	0.0301936
cg01057599	0.260962	0.273769	-0.0128065	0.182217	0.177171	0.0050457	0.094986	0.123093	-0.028107	0.201532	0.188219	0.0133127
cg01058688	0.679974	0.693154	-0.0131794	0.86503	0.849207	0.0158232	0.918497	0.891998	0.0264987	0.912133	0.950012	-0.037879
cg01058932	0.0637871	0.0574777	0.0063094	0.135805	0.152158	-0.016353	0.398037	0.38938	0.00865724	0.096049	0.0873615	0.00868751
cg01063406	0.0618643	0.0718874	-0.0100231	0.0427382	0.0267986	0.0159396	0.0379423	0.0226161	0.0153261	0.0302009	0.0344496	-0.00424865
cg01063768	0.855952	0.882425	-0.0264729	0.633272	0.629	0.00427166	0.524066	0.523981	8.49794e-05	0.54326	0.533	0.0102595
cg01067505	0.240986	0.250171	-0.00918442	0.141467	0.154628	-0.0131605	0.124354	0.0951057	0.029248	0.0752757	0.0659531	0.00932254
cg01069311	0.16435	0.15548	0.00887067	0.273357	0.266862	0.00649476	0.340276	0.333617	0.00665907	0.313407	0.313304	0.000102276
cg01072750	0.670468	0.683357	-0.0128892	0.538361	0.580125	-0.0417641	0.786009	0.788828	-0.00281857	0.793558	0.788465	0.00509372
cg01076406	0.600793	0.566598	0.0341945	0.590018	0.603522	-0.0135043	0.50482	0.484113	0.0207069	0.559513	0.549625	0.00988829
cg01078706	0.347589	0.342175	0.00541352	0.395594	0.406444	-0.0108496	0.32283	0.323788	-0.000958533	0.230014	0.262995	-0.0329815
cg01080862	0.568696	0.56341	0.00528594	0.603763	0.600111	0.00365213	0.775147	0.760558	0.0145896	0.572865	0.551134	0.021731
cg01081720	0.13999	0.123021	0.0169692	0.366053	0.359005	0.00704743	0.365205	0.355323	0.00988208	0.0882178	0.0877793	0.000438483
cg01084328	0.38343	0.365276	0.0181546	0.538821	0.506288	0.0325323	0.310281	0.327721	-0.0174396	0.400942	0.441914	-0.0409729
cg01086868	0.551259	0.565989	-0.0147293	0.581027	0.57558	0.00544798	0.651767	0.659583	-0.00781528	0.569711	0.559949	0.00976171
cg01087287	0.490594	0.511919	-0.0213247	0.469633	0.456886	0.0127472	0.372804	0.361668	0.0111354	0.362652	0.355476	0.00717633
cg01087775	0.362006	0.417187	-0.055181	0.462711	0.449922	0.0127893	0.461794	0.454663	0.00713057	0.408477	0.417862	-0.00938532
cg01098518	0.0650069	0.0589409	0.00606598	0.0889929	0.0888297	0.000163175	0.0457205	0.0760341	-0.0303136	0.0430124	0.049862	-0.00684957
cg01098871	0.554505	0.550833	0.00367212	0.467007	0.505672	-0.0386649	0.626527	0.71339	-0.0868633	0.481261	0.461938	0.0193228
cg01099541	0.365698	0.372389	-0.00669081	0.239081	0.243385	-0.00430422	0.33466	0.325315	0.00934575	0.315394	0.326366	-0.010972
cg01104810	0.786121	0.771299	0.0148217	0.707184	0.689782	0.017402	0.579957	0.638228	-0.058271	0.836358	0.89851	-0.0621522
cg01108554	0.591071	0.591033	3.77148e-05	0.473153	0.505028	-0.0318746	0.536864	0.534871	0.0019933	0.540938	0.519514	0.0214247
cg01109012	0.224523	0.237308	-0.0127844	0.266286	0.270521	-0.00423442	0.357498	0.353283	0.00421458	0.185448	0.201604	-0.0161555
cg01109660	0.0583684	0.0603255	-0.00195711	0.106492	0.103863	0.0026292	0.111976	0.0889045	0.023072	0.0767379	0.065309	0.0114289
cg01110418	0.689437	0.694169	-0.00473184	0.589916	0.557146	0.0327697	0.464485	0.455714	0.0087713	0.539186	0.48559	0.0535961
cg01110765	0.593066	0.580879	0.012187	0.0657334	0.0699143	-0.00418089	0.100895	0.11484	-0.0139446	0.784679	0.775908	0.00877098
cg01112624	0.249684	0.272418	-0.0227336	0.252044	0.262416	-0.0103718	0.393149	0.390171	0.00297803	0.588067	0.543997	0.0440698
cg01112702	0.521053	0.579515	-0.0584624	0.751759	0.793366	-0.041607	0.771981	0.737077	0.0349039	0.805078	0.7936	0.0114785
cg01112930	0.940053	0.946342	-0.00628953	0.906371	0.904594	0.0017771	0.93568	0.930078	0.00560213	0.926975	0.925812	0.00116285
cg01114138	0.780067	0.76719	0.0128767	0.895656	0.910003	-0.0143472	0.937047	0.917946	0.0191017	0.670037	0.657291	0.0127464
cg01114504	0.829393	0.821429	0.0079631	0.287832	0.28495	0.00288223	0.289349	0.307631	-0.0182822	0.492494	0.458542	0.0339515
cg01115560	0.603942	0.637632	-0.0336905	0.633409	0.621383	0.0120258	0.0974331	0.114642	-0.0172088	0.691085	0.69385	-0.00276518
cg01115636	0.406958	0.39081	0.0161479	0.102293	0.0720426	0.0302502	0.16763	0.134645	0.0329852	0.541462	0.500407	0.0410557
cg01118900	0.857195	0.84234	0.0148549	0.840857	0.831236	0.00962049	0.904734	0.881586	0.0231481	0.891998	0.878746	0.0132522
cg01119520	0.520447	0.534817	-0.0143704	0.434465	0.414887	0.0195785	0.460058	0.452863	0.00719489	0.454566	0.438014	0.0165519
cg01119763	0.19035	0.237581	-0.0472311	0.358611	0.409824	-0.0512132	0.523476	0.538475	-0.0149983	0.446277	0.437928	0.00834862
cg01120006	0.295616	0.27872	0.0168966	0.301488	0.289054	0.0124346	0.0924382	0.18355	-0.0911119	0.676641	0.711518	-0.0348767
cg01123965	0.128884	0.116341	0.0125431	0.120029	0.113773	0.00625623	0.121232	0.123832	-0.00259996	0.220469	0.211514	0.00895451
cg01125381	0.229965	0.228569	0.00139583	0.336638	0.363141	-0.0265031	0.446611	0.446856	-0.00024509	0.233953	0.242618	-0.00866486
cg01127291	0.479693	0.479489	0.000204011	0.2129	0.22617	-0.01327	0.449533	0.44724	0.00229268	0.538144	0.548085	-0.00994094
cg01131699	0.295192	0.280501	0.0146914	0.0695641	0.0533195	0.0162446	0.0808316	0.100967	-0.0201357	0.0807312	0.105398	-0.0246668
cg01131961	0.708235	0.72424	-0.0160053	0.750358	0.75529	-0.00493239	0.476427	0.477922	-0.00149543	0.83012	0.786216	0.0439031
cg01132485	0.116932	0.137866	-0.0209338	0.171029	0.187817	-0.0167886	0.214759	0.133324	0.0814347	0.322296	0.331175	-0.00887929
cg01134144	0.113481	0.11508	-0.00159907	0.0649462	0.0473971	0.0175491	0.0415668	0.0458651	-0.00429832	0.509571	0.515255	-0.0056842
cg01134497	0.500987	0.509533	-0.00854554	0.261194	0.267357	-0.00616276	0.573136	0.575854	-0.00271874	0.322639	0.376811	-0.0541717
cg01135626	0.424072	0.459274	-0.0352013	0.464485	0.471987	-0.0075015	0.215709	0.197996	0.0177127	0.625929	0.617045	0.00888385
cg01137368	0.749872	0.760184	-0.0103119	0.594213	0.558258	0.0359554	0.774736	0.766932	0.00780394	0.793284	0.844494	-0.0512105
cg01138740	0.195312	0.180011	0.0153007	0.249297	0.242338	0.00695891	0.114134	0.0752757	0.0388582	0.197856	0.191278	0.00657835
cg01145939	0.408945	0.413821	-0.00487669	0.650693	0.647043	0.00365014	0.410949	0.421826	-0.0108768	0.608713	0.611122	-0.00240914
cg01146870	0.417288	0.425702	-0.00841395	0.683397	0.682155	0.00124294	0.43678	0.471158	-0.0343774	0.376579	0.392713	-0.0161333
cg01151305	0.125792	0.13772	-0.011928	0.0615886	0.071288	-0.00969932	0.166778	0.142044	0.0247335	0.14865	0.1464	0.00225022
cg01162841	0.874298	0.878114	-0.00381587	0.92229	0.902746	0.0195436	0.410344	0.464369	-0.0540247	0.807382	0.818283	-0.0109006
cg01162900	0.822491	0.797796	0.0246948	0.847851	0.849663	-0.00181124	0.820957	0.831671	-0.0107141	0.832998	0.844846	-0.0118478
cg01169440	0.234675	0.261766	-0.0270905	0.0525175	0.0533999	-0.000882342	0.40438	0.399508	0.00487205	0.037861	0.0340872	0.00377382
cg01169463	0.0288495	0.0258841	0.00296542	0.0651915	0.043784	0.0214075	0.0648606	0.0389175	0.0259431	0.0369139	0.0477385	-0.0108246
cg01172484	0.490995	0.502809	-0.0118139	0.469311	0.47778	-0.00846829	0.264525	0.307989	-0.0434645	0.129328	0.119428	0.0099
cg01172526	0.372973	0.389287	-0.0163149	0.587254	0.585283	0.00197148	0.205138	0.202652	0.0024857	0.656655	0.649651	0.00700347
cg01173474	0.456285	0.438299	0.0179853	0.649446	0.660056	-0.0106098	0.320379	0.32466	-0.0042813	0.338611	0.362275	-0.0236638
cg01173508	0.489768	0.471985	0.0177828	0.412235	0.400283	0.0119525	0.0462101	0.0527063	-0.00649622	0.395515	0.383462	0.012053
cg01177664	0.077281	0.0894817	-0.0122007	0.1614	0.183947	-0.0225461	0.199037	0.174077	0.0249604	0.0951057	0.117551	-0.0224448
cg01177972	0.925503	0.89565	0.0298527	0.883866	0.925379	-0.0415125	0.866223	0.887947	-0.0217243	0.926482	0.932451	-0.00596925
cg01186310	0.841756	0.867298	-0.0255417	0.826046	0.840441	-0.014395	0.867877	0.875314	-0.00743739	0.868157	0.863388	0.00476905
cg01191578	0.638091	0.638598	-0.000506749	0.451439	0.468406	-0.0169665	0.441746	0.442969	-0.00122351	0.443954	0.422285	0.0216687
cg01191902	0.411908	0.430421	-0.0185129	0.514483	0.561121	-0.0466382	0.575767	0.596252	-0.0204852	0.396388	0.412924	-0.0165356
cg01193954	0.770098	0.767096	0.00300256	0.593173	0.601056	-0.00788386	0.0971071	0.0560808	0.0410263	0.675709	0.66574	0.00996926
cg01195014	0.620932	0.640729	-0.0197973	0.644789	0.612354	0.0324353	0.753082	0.735857	0.0172256	0.0846505	0.0736718	0.0109787
cg01203948	0.382696	0.389508	-0.00681157	0.449631	0.433303	0.0163278	0.844994	0.844406	0.000588226	0.2885	0.287038	0.00146184
cg01207481	0.0482479	0.063729	-0.0154811	0.0703084	0.106785	-0.0364764	0.0976446	0.069341	0.0283035	0.0564687	0.0505493	0.00591933
cg01210880	0.12622	0.136807	-0.0105862	0.311982	0.297583	0.0143994	0.374691	0.377039	-0.00234804	0.15345	0.136143	0.0173072
cg01218690	0.763955	0.807858	-0.0439035	0.44021	0.414555	0.025655	0.0523975	0.0335269	0.0188706	0.756846	0.740937	0.0159088
cg01222180	0.604754	0.572428	0.0323258	0.857981	0.87483	-0.0168488	0.714972	0.70918	0.00579231	0.820331	0.829081	-0.0087499
cg01225298	0.414996	0.403042	0.0119546	0.412745	0.448153	-0.0354081	0.272538	0.258819	0.0137187	0.384755	0.384827	-7.2045e-05
cg01227136	0.0568224	0.0578637	-0.00104131	0.0813404	0.116055	-0.0347149	0.156908	0.111729	0.0451786	0.0604974	0.0667603	-0.00626292
cg01228667	0.442288	0.450998	-0.00871039	0.420222	0.427711	-0.00748971	0.5665	0.557756	0.00874345	0.41885	0.424823	-0.00597239
cg01231576	0.336343	0.365884	-0.0295409	0.0990155	0.117034	-0.0180186	0.101505	0.0814589	0.020046	0.107967	0.147305	-0.0393378
cg01241836	0.452354	0.448475	0.00387887	0.438898	0.450062	-0.0111642	0.612545	0.629206	-0.0166607	0.434442	0.446385	-0.0119423
cg01243226	0.839637	0.821884	0.0177528	0.876485	0.848362	0.0281231	0.878035	0.871429	0.00660563	0.873815	0.876788	-0.00297381
cg01244877	0.505759	0.483482	0.0222772	0.457943	0.494522	-0.0365789	0.607471	0.582746	0.0247251	0.417757	0.468976	-0.0512196
cg01245531	0.408579	0.404003	0.00457568	0.197489	0.21285	-0.0153609	0.424926	0.420452	0.0044741	0.298738	0.335331	-0.0365924
cg01257202	0.30051	0.276231	0.0242783	0.343246	0.356523	-0.0132768	0.474863	0.503709	-0.0288466	0.251704	0.25732	-0.00561533
cg01275664	0.594815	0.616736	-0.0219213	0.641151	0.659491	-0.0183393	0.391803	0.415869	-0.0240657	0.708789	0.730758	-0.0219688
cg01279057	0.502797	0.500534	0.00226217	0.714298	0.721779	-0.00748038	0.149009	0.0987208	0.0502886	0.545055	0.552821	-0.0077664
cg01280366	0.486185	0.473062	0.0131226	0.532491	0.522397	0.0100946	0.60482	0.586324	0.0184955	0.706556	0.674774	0.031782
cg01282661	0.76987	0.765196	0.00467393	0.542489	0.491601	0.0508875	0.452663	0.45243	0.000233308	0.134923	0.143645	-0.00872184
cg01283227	0.455728	0.453754	0.00197445	0.689132	0.692634	-0.00350182	0.45312	0.437243	0.0158765	0.105722	0.104761	0.000960743
cg01284128	0.700553	0.697445	0.0031081	0.836326	0.859671	-0.0233451	0.858698	0.855737	0.0029614	0.637562	0.663259	-0.0256962
cg01286388	0.463492	0.477421	-0.0139287	0.391658	0.391447	0.000210392	0.607085	0.59649	0.0105948	0.396243	0.43443	-0.0381865
cg01288367	0.440643	0.455087	-0.014444	0.431342	0.430914	0.000428196	0.575094	0.569151	0.0059432	0.388263	0.383649	0.00461369
cg01289637	0.391964	0.438765	-0.0468003	0.640261	0.634868	0.00539264	0.265978	0.269026	-0.00304775	0.544523	0.539661	0.00486207
cg01293271	0.394982	0.332608	0.0623742	0.160781	0.148979	0.0118015	0.535516	0.530487	0.00502968	0.115726	0.112215	0.00351118
cg01293417	0.628765	0.639001	-0.0102359	0.631354	0.654159	-0.0228048	0.786105	0.778717	0.00738783	0.409319	0.429837	-0.0205171
cg01296971	0.368769	0.358492	0.0102769	0.120885	0.144114	-0.0232289	0.0942093	0.0911798	0.00302945	0.0749341	0.071288	0.00364612
cg01301326	0.433573	0.443294	-0.00972075	0.234852	0.240824	-0.00597194	0.607769	0.608049	-0.000280891	0.375551	0.409488	-0.0339374
cg01302641	0.057969	0.0601975	-0.00222848	0.0741861	0.0924293	-0.0182432	0.0895044	0.122033	-0.032529	0.078156	0.0722278	0.00592815
cg01306265	0.56724	0.60093	-0.0336904	0.28824	0.308067	-0.0198278	0.392761	0.393889	-0.00112768	0.0803933	0.0756265	0.00476676
cg01307615	0.379298	0.399888	-0.0205896	0.528164	0.553964	-0.0257999	0.060249	0.0991553	-0.0389063	0.591852	0.589304	0.00254791
cg01307742	0.67108	0.667969	0.0031114	0.696103	0.711692	-0.0155891	0.467572	0.476597	-0.00902473	0.715848	0.734864	-0.0190152
cg01308913	0.233679	0.248793	-0.0151138	0.247953	0.247337	0.000616617	0.264847	0.260052	0.00479576	0.558777	0.57558	-0.016803
cg01309671	0.135803	0.149394	-0.0135904	0.410147	0.427955	-0.0178081	0.268559	0.304636	-0.0360775	0.152033	0.146769	0.00526446
cg01314643	0.377461	0.419764	-0.0423025	0.167161	0.172222	-0.00506138	0.515799	0.522994	-0.00719456	0.103829	0.101164	0.00266513
cg01316390	0.0391982	0.0333918	0.00580637	0.0307107	0.037693	-0.00698231	0.0345626	0.036807	-0.00224439	0.0250375	0.0261124	-0.00107494
cg01319581	0.754175	0.769961	-0.0157867	0.181084	0.176809	0.00427546	0.872902	0.876105	-0.00320269	0.781775	0.802165	-0.0203894
cg01321220	0.955368	0.928013	0.0273554	0.643713	0.65886	-0.0151472	0.936517	0.949556	-0.0130386	0.959446	0.926668	0.0327786
cg01321830	0.391356	0.423579	-0.0322222	0.525903	0.557873	-0.0319695	0.349078	0.363405	-0.0143267	0.524423	0.536912	-0.0124894
cg01325935	0.814699	0.814136	0.000563089	0.594084	0.616111	-0.0220268	0.430845	0.421582	0.00926271	0.637176	0.63275	0.00442574
cg01326358	0.0479486	0.0495935	-0.0016449	0.487013	0.439903	0.0471097	0.125011	0.0873352	0.0376756	0.120115	0.117228	0.00288733
cg01327767	0.818534	0.795849	0.0226842	0.604465	0.592031	0.0124341	0.523605	0.488183	0.0354216	0.761584	0.76702	-0.0054359
cg01336098	0.738176	0.803333	-0.0651571	0.773944	0.749534	0.0244097	0.792438	0.798561	-0.00612254	0.751244	0.728181	0.0230635
cg01337545	0.509979	0.506298	0.0036808	0.306475	0.29561	0.0108649	0.654809	0.635754	0.0190547	0.591497	0.577601	0.0138963
cg01337817	0.395473	0.429531	-0.0340578	0.437082	0.451083	-0.0140005	0.560131	0.557689	0.00244175	0.610673	0.644507	-0.0338339
cg01340520	0.211782	0.233951	-0.0221687	0.123405	0.134604	-0.0111992	0.45891	0.460786	-0.00187552	0.437265	0.368119	0.069146
cg01342901	0.689527	0.673786	0.0157414	0.62816	0.664548	-0.036388	0.802339	0.810498	-0.00815827	0.630016	0.637387	-0.00737179
cg01345087	0.51047	0.542342	-0.0318723	0.514708	0.522896	-0.00818798	0.67382	0.651908	0.0219128	0.461946	0.495212	-0.0332664
cg01348758	0.100671	0.0986174	0.00205377	0.0417018	0.0440901	-0.00238831	0.0889929	0.138275	-0.0492816	0.228806	0.236288	-0.00748249
cg01349336	0.614633	0.579621	0.0350124	0.508112	0.471914	0.0361981	0.539322	0.533464	0.0058586	0.407598	0.403863	0.00373521
cg01349480	0.075327	0.0798774	-0.00455036	0.0457205	0.044996	0.00072449	0.0855559	0.050218	0.0353378	0.0525337	0.054531	-0.00199722
cg01353788	0.580817	0.598162	-0.0173445	0.503368	0.524189	-0.0208214	0.751292	0.76872	-0.0174278	0.576686	0.610723	-0.0340362
cg01353903	0.461981	0.480875	-0.0188944	0.691175	0.679032	0.0121438	0.480158	0.471496	0.00866227	0.56357	0.568649	-0.00507897
cg01354447	0.610051	0.633369	-0.0233181	0.671418	0.678682	-0.00726376	0.611193	0.593049	0.0181434	0.692915	0.698271	-0.00535637
cg01355242	0.49887	0.528238	-0.0293686	0.771082	0.799892	-0.0288093	0.432915	0.431777	0.00113742	0.718196	0.740544	-0.0223483
cg01359309	0.388599	0.417109	-0.0285098	0.457057	0.496666	-0.0396087	0.17686	0.112399	0.0644611	0.564477	0.522765	0.0417124
cg01361446	0.161835	0.135822	0.0260125	0.0334473	0.0308707	0.00257661	0.0445592	0.0483998	-0.00384061	0.0403571	0.0347108	0.0056463
cg01364253	0.497839	0.513469	-0.0156303	0.621812	0.589853	0.0319588	0.126492	0.109828	0.016664	0.0987208	0.0941283	0.00459253
cg01368763	0.896417	0.900995	-0.00457778	0.841018	0.831709	0.00930826	0.886912	0.889561	-0.00264942	0.875832	0.896204	-0.0203724
cg01370077	0.550712	0.581311	-0.0305995	0.543388	0.587873	-0.0444855	0.755416	0.745586	0.00983016	0.536757	0.573332	-0.0365752
cg01372422	0.0931935	0.0851747	0.00801881	0.0921073	0.0915567	0.000550651	0.254589	0.259335	-0.00474566	0.155128	0.145251	0.0098767
cg01372992	0.324916	0.293258	0.0316579	0.386217	0.396649	-0.0104315	0.242024	0.254976	-0.012952	0.0874839	0.0850275	0.00245645
cg01373750	0.848658	0.843857	0.00480046	0.62057	0.573583	0.0469878	0.74579	0.719082	0.026708	0.678131	0.713819	-0.0356877
cg01375263	0.786026	0.808465	-0.0224394	0.599298	0.554511	0.0447871	0.548407	0.535461	0.0129459	0.820759	0.846206	-0.0254477
cg01375994	0.258544	0.298641	-0.0400973	0.47233	0.470137	0.00219316	0.520315	0.52973	-0.00941449	0.493704	0.502032	-0.00832833
cg01377936	0.636123	0.658781	-0.0226586	0.0953466	0.111196	-0.0158498	0.0743623	0.0962545	-0.0218921	0.514109	0.502229	0.0118803
cg01378112	0.913269	0.942824	-0.0295552	0.937414	0.920914	0.0165004	0.90238	0.900394	0.00198601	0.866559	0.871417	-0.00485857
cg01379263	0.57079	0.551527	0.0192623	0.726156	0.718951	0.00720549	0.405124	0.412221	-0.00709739	0.32752	0.345504	-0.0179841
cg01381545	0.231904	0.245096	-0.0131922	0.370733	0.373134	-0.00240105	0.589504	NA	NA	0.448614	0.458102	-0.00948778
cg01382771	0.0412576	0.0399561	0.00130148	0.0776199	0.0377818	0.0398381	0.0394224	0.0474805	-0.00805804	0.0412394	0.0268229	0.0144165
cg01383228	0.345299	0.32664	0.0186587	0.438121	0.441598	-0.00347691	0.285651	0.305897	-0.0202457	0.407475	0.410266	-0.0027911
cg01383599	0.733357	0.740776	-0.00741885	0.75525	0.754919	0.000331161	0.476364	0.48664	-0.0102761	0.59692	0.583254	0.0136659
cg01384686	0.437831	0.459384	-0.0215525	0.497601	0.491641	0.00596039	0.623967	0.665924	-0.0419572	0.500701	0.523176	-0.0224741
cg01396530	0.0743946	0.0689482	0.00544639	0.102561	0.0778479	0.0247127	0.383291	0.382565	0.000726211	0.12645	0.122245	0.00420421
cg01398148	0.719156	0.71846	0.000695963	0.699855	0.70027	-0.000414344	0.450243	0.451378	-0.00113591	0.737795	0.821468	-0.083673
cg01398912	0.463799	0.470499	-0.0066996	0.497917	0.495742	0.0021747	0.343054	0.375395	-0.0323406	0.469565	0.449828	0.019737
cg01404374	0.636787	0.624504	0.0122823	0.753639	0.736521	0.0171178	0.459079	0.493857	-0.0347774	0.652253	0.594597	0.0576556
cg01404988	0.0842212	0.0811666	0.0030546	0.157899	0.1406	0.0172991	0.120885	0.144872	-0.023987	0.0704972	0.0831216	-0.0126244
cg01408260	0.687447	0.710304	-0.0228573	0.174187	0.159452	0.014735	0.162272	0.168253	-0.00598069	0.43075	0.484209	-0.0534588
cg01408383	0.446062	0.476196	-0.0301331	0.465	0.478891	-0.0138914	0.573463	0.572094	0.00136844	0.471335	0.434093	0.0372425
cg01408682	0.209509	0.190798	0.018711	0.32106	0.385831	-0.0647706	0.390262	0.374629	0.0156321	0.367343	0.383539	-0.0161958
cg01409685	0.809381	0.806637	0.00274323	0.616091	0.552474	0.0636173	0.428475	0.509212	-0.0807372	0.823355	0.758594	0.0647618
cg01411845	0.0202963	0.0190562	0.00124002	0.0211966	0.019633	0.00156355	0.0207771	0.0232495	-0.00247241	0.0186572	0.0219802	-0.00332309
cg01413291	0.776241	0.786923	-0.0106812	0.753784	0.759519	-0.00573572	0.798632	0.803572	-0.00494001	0.751613	0.747924	0.0036894
cg01415112	0.264946	0.276976	-0.01203	0.437409	0.469661	-0.0322517	0.607863	0.609454	-0.00159113	0.484504	0.464561	0.0199427
cg01419069	0.799699	0.793638	0.00606122	0.640054	0.64823	-0.00817578	0.673332	0.763838	-0.0905061	0.746475	0.760744	-0.0142699
cg01426251	0.5974	0.575938	0.0214615	0.41825	0.347394	0.0708562	0.0537384	0.0272779	0.0264605	0.53689	0.57068	-0.0337905
cg01430241	0.561358	0.580164	-0.0188058	0.529447	0.550403	-0.0209557	0.743277	0.779618	-0.0363414	0.566092	0.576402	-0.0103105
cg01460974	0.149015	0.121121	0.0278941	0.045195	0.0555235	-0.0103285	0.245831	0.24564	0.000190947	0.059011	0.0688077	-0.00979669
cg01461762	0.265598	0.333454	-0.0678558	0.447197	0.473607	-0.0264099	0.598812	0.591852	0.00696033	0.459392	0.426178	0.033214
cg01462040	0.504166	0.491934	0.0122325	0.410885	0.453419	-0.0425342	0.636543	0.592683	0.0438605	0.436156	0.428386	0.00777027
cg01465073	0.384135	0.405952	-0.0218173	0.439595	0.455288	-0.0156935	0.151884	0.182754	-0.03087	0.432882	0.399663	0.033219
cg01466335	0.650794	0.60892	0.0418735	0.0560507	0.040109	0.0159417	0.572945	0.541411	0.0315337	0.161058	0.171156	-0.0100981
cg01466576	0.559262	0.557249	0.00201219	0.510911	0.464122	0.046789	0.512137	0.508602	0.00353438	0.446188	0.439337	0.00685117
cg01467249	0.535353	0.59279	-0.057437	0.606549	0.620461	-0.0139112	0.800638	0.804484	-0.00384662	0.610429	0.60098	0.00944909
cg01473187	0.679016	0.705444	-0.0264281	0.400664	0.387301	0.0133622	0.40181	0.394549	0.00726039	0.740171	0.776569	-0.0363971
cg01473525	0.522108	0.546936	-0.024828	0.434642	0.419862	0.0147805	0.195653	0.191215	0.00443845	0.412567	0.403206	0.00936155
cg01479413	0.616257	0.602263	0.0139948	0.610015	0.605142	0.00487286	0.757324	0.771435	-0.0141108	0.547853	0.560656	-0.0128036
cg01480550	0.522861	0.510916	0.0119449	0.353543	0.402015	-0.0484714	0.563251	0.556082	0.00716899	0.131686	0.130087	0.0015983
cg01488378	0.173234	0.213877	-0.0406433	0.557213	0.590035	-0.0328225	0.701103	0.669059	0.0320445	0.574934	0.592504	-0.0175704
cg01490258	0.050508	0.0461704	0.00433762	0.0532425	0.0629605	-0.00971796	0.0806219	0.071265	0.00935684	0.0619001	0.0552134	0.00668666
cg01498090	0.0856194	0.0907107	-0.00509124	0.381625	0.385361	-0.00373615	0.0378663	0.0324436	0.00542269	0.0253161	0.0434142	-0.0180981
cg01501252	0.0478263	0.0497749	-0.0019486	0.0698226	0.0723546	-0.00253198	0.0579736	0.119281	-0.0613069	0.0394198	0.0644609	-0.0250411
cg01514943	0.0772087	0.0773821	-0.00017338	0.419964	0.463509	-0.0435449	0.171415	0.206023	-0.0346082	0.410286	0.412352	-0.00206574
cg01523763	0.783523	0.782183	0.0013396	0.728358	0.749361	-0.0210025	0.59373	0.607229	-0.0134986	0.738074	0.741644	-0.00357048
cg01523865	0.590556	0.594312	-0.00375591	0.520619	0.536073	-0.0154544	0.639599	0.647904	-0.00830462	0.508232	0.49298	0.0152522
cg01528616	0.529399	0.522487	0.00691226	0.697868	0.708135	-0.0102671	0.497778	0.503709	-0.00593075	0.745733	0.755652	-0.00991917
cg01528835	0.577719	0.606023	-0.0283044	0.50611	0.525139	-0.0190299	0.479271	0.491168	-0.0118971	0.554451	0.529481	0.0249704
cg01529679	0.149954	0.143236	0.00671805	0.380776	0.355929	0.024847	0.339699	0.321737	0.0179618	0.20348	0.215815	-0.012335
cg01530521	0.542708	0.555447	-0.0127393	0.514095	0.559215	-0.0451197	0.638283	0.606196	0.0320876	0.495002	0.474563	0.0204394
cg01537968	0.477102	0.453337	0.023765	0.498967	0.528355	-0.0293882	0.671944	0.642678	0.0292661	0.503656	0.529106	-0.0254502
cg01540386	0.3741	0.405581	-0.0314804	0.223181	0.217375	0.00580554	0.7471	0.702219	0.0448803	0.184242	0.200374	-0.0161327
cg01540916	0.448202	0.354426	0.0937763	0.0553063	0.0634843	-0.00817795	0.128595	0.107329	0.0212665	0.480874	0.419985	0.0608885
cg01545419	0.72899	0.712699	0.0162904	0.808198	0.834431	-0.0262329	0.838034	0.852541	-0.0145067	0.839267	0.828594	0.0106723
cg01556010	0.482862	0.491603	-0.00874101	0.526369	0.524625	0.00174367	0.15468	0.132156	0.0225248	0.518459	0.549306	-0.0308477
cg01556112	0.244713	0.291007	-0.0462943	0.481808	0.458542	0.0232658	0.410738	0.419992	-0.00925432	0.217655	0.229422	-0.0117676
cg01558501	0.763371	0.816894	-0.0535223	0.513415	0.493548	0.0198669	0.923587	0.942828	-0.0192404	0.418029	0.433769	-0.0157399
cg01559064	0.813049	0.796434	0.0166151	0.745497	0.733877	0.0116197	0.817907	0.792702	0.0252049	0.557977	0.537598	0.0203789
cg01560464	0.646756	0.675725	-0.0289688	0.941093	0.857581	0.0835117	0.59356	0.538595	0.0549644	0.623306	0.627252	-0.0039457
cg01560885	0.535456	0.515927	0.0195295	0.746571	0.761194	-0.0146234	0.538922	0.521905	0.0170167	0.37865	0.347308	0.0313414
cg01562833	0.442837	0.431148	0.0116892	0.533913	0.536544	-0.00263116	0.600507	0.61244	-0.0119336	0.508098	0.53838	-0.0302822
cg01563671	0.565559	0.620347	-0.0547884	0.750764	0.805011	-0.0542468	0.907419	0.900059	0.0073604	0.46442	0.487966	-0.0235454
cg01564045	0.58071	0.559895	0.0208151	0.75775	0.744458	0.0132929	0.465997	0.476489	-0.0104922	0.524157	0.497914	0.0262428
cg01564333	0.800537	0.791981	0.00855662	0.839338	0.82707	0.0122677	0.73351	0.617785	0.115725	0.786246	0.849521	-0.0632757
cg01564693	0.555468	0.570742	-0.0152743	0.45234	0.452005	0.000335881	0.777342	0.77525	0.00209203	0.796898	0.826955	-0.030057
cg01567000	0.0982656	0.0935858	0.0046798	0.310752	0.31091	-0.000158226	0.403586	0.421677	-0.0180912	0.230904	0.235967	-0.00506211
cg01568488	0.063518	0.0681782	-0.00466021	0.339254	0.323055	0.0161988	0.0769627	0.063663	0.0132997	0.0387027	0.0404569	-0.00175429
cg01575816	0.428413	0.417289	0.0111232	0.469468	0.485629	-0.0161617	0.245336	0.269503	-0.0241665	0.555026	0.583862	-0.0288365
cg01576669	0.651213	0.673449	-0.0222359	0.661756	0.612592	0.0491638	0.457645	0.433506	0.0241394	0.765332	0.716417	0.0489157
cg01577745	0.898643	0.912297	-0.0136541	0.866995	0.88895	-0.0219554	0.893873	0.901632	-0.00775897	0.891085	0.900386	-0.00930117
cg01579322	0.461052	0.476489	-0.0154373	0.489565	0.47482	0.0147452	0.616091	0.6298	-0.0137094	0.480121	0.452363	0.0277574
cg01581349	0.565101	0.566793	-0.00169246	0.591771	0.587873	0.00389747	0.522443	0.521552	0.000890655	0.629309	0.602061	0.0272484
cg01592490	0.0880976	0.107076	-0.018978	0.344264	0.302432	0.0418315	0.211743	0.218562	-0.00681877	0.453292	0.472953	-0.0196607
cg01593269	0.450263	0.431007	0.019256	0.503107	0.517351	-0.0142447	0.282102	0.275707	0.00639453	0.478527	0.503719	-0.0251926
cg01596349	0.452615	0.487489	-0.0348743	0.454138	0.471719	-0.0175808	0.614767	0.625329	-0.0105621	0.451175	0.450894	0.000280698
cg01597947	0.122349	0.114915	0.00743368	0.28633	0.285571	0.000758631	0.496518	0.489673	0.00684473	0.725774	0.745342	-0.0195682
cg01598357	0.0496022	0.0517127	-0.00211056	0.0415419	0.0365693	0.00497262	0.0389203	0.0374119	0.00150843	0.184622	0.181971	0.00265102
cg01600263	0.0989104	0.0980632	0.000847199	0.412657	0.420569	-0.00791257	0.233578	0.249934	-0.016356	0.353798	0.406444	-0.0526451
cg01607721	0.915333	0.902146	0.0131871	0.93568	0.95678	-0.0210995	0.489757	0.520431	-0.0306739	0.914542	0.87574	0.0388023
cg01609611	0.0619514	0.0678392	-0.00588777	0.155735	0.15173	0.00400571	0.150494	0.174463	-0.0239692	0.0870806	0.0811582	0.00592241
cg01634761	0.182061	0.181695	0.000365813	0.126226	0.151102	-0.0248758	0.564889	0.542508	0.0223809	0.364648	0.369561	-0.00491303
cg01640808	0.669355	0.706722	-0.0373669	0.897396	0.90839	-0.0109934	0.935974	0.924579	0.0113953	0.60451	0.597152	0.00735833
cg01651728	0.23947	0.246583	-0.00711253	0.0767551	0.0509542	0.0258009	0.272374	0.263902	0.0084718	0.124476	0.124046	0.000429736
cg01669374	0.525257	0.534093	-0.00883616	0.573777	0.603695	-0.0299173	0.642591	0.709373	-0.0667828	0.546436	0.525286	0.0211501
cg01673753	0.137301	0.137113	0.000187998	0.285651	0.276737	0.00891441	0.043218	0.056592	-0.013374	0.217296	0.211708	0.00558781
cg01674874	0.0678735	0.0628096	0.00506391	0.117131	0.134306	-0.0171749	0.0404579	0.0307524	0.00970554	0.0604116	0.0754647	-0.0150531
cg01679167	0.322934	0.296487	0.0264466	0.525256	0.563659	-0.0384037	0.366053	0.351793	0.0142595	0.527967	0.503532	0.0244343
cg01680245	0.197389	0.223673	-0.0262836	0.318357	0.326517	-0.00816062	0.306475	0.290183	0.0162915	0.378465	0.380331	-0.00186533
cg01683788	0.511188	0.489842	0.0213456	0.106674	0.0885689	0.018105	0.0959236	0.0967114	-0.00078784	0.0710726	0.0639955	0.00707713
cg01704778	0.92034	0.917935	0.00240472	0.905432	0.924003	-0.0185707	0.910323	0.91509	-0.00476688	0.943384	0.949553	-0.00616868
cg01713430	0.815951	0.848205	-0.0322539	0.914976	0.851542	0.0634333	0.5841	0.58482	-0.000720026	0.773424	0.788863	-0.0154389
cg01714671	0.0486011	0.0565344	-0.00793334	0.0807561	0.0787284	0.00202774	0.100699	0.108845	-0.00814503	0.0674606	0.0621919	0.00526864
cg01716666	0.389577	0.375444	0.0141326	0.490444	0.497633	-0.0071897	0.468244	0.467011	0.00123296	0.471988	0.473699	-0.00171103
cg01717812	0.22862	0.199592	0.0290281	0.427841	0.395385	0.0324559	0.22719	0.211411	0.015779	0.244193	0.243806	0.000387558
cg01725669	0.61259	0.565881	0.0467094	0.756068	0.761955	-0.00588749	0.428346	0.443156	-0.01481	0.779201	0.791057	-0.0118562
cg01730177	0.768684	0.756365	0.0123189	0.93359	0.91867	0.0149206	0.912473	0.938235	-0.0257622	0.845492	0.846628	-0.00113571
cg01730928	0.497206	0.528326	-0.0311202	0.516901	0.569905	-0.0530041	0.645212	0.602184	0.0430282	0.549382	0.514428	0.0349535
cg01731542	0.335056	0.34484	-0.00978381	0.78152	0.791851	-0.0103314	0.482329	0.470204	0.0121249	0.55048	0.542414	0.00806594
cg01737010	0.395613	0.377333	0.0182804	0.32283	0.336849	-0.0140191	0.38307	0.387004	-0.00393455	0.194289	0.174401	0.0198884
cg01737550	0.0565966	0.0610474	-0.00445079	0.0513954	0.0683885	-0.0169931	0.188974	0.185185	0.00378899	0.0650948	0.0574583	0.00763654
cg01740135	0.528714	0.522827	0.00588768	0.421841	0.417552	0.00428912	0.411568	0.43075	-0.0191821	0.525234	0.538967	-0.0137325
cg01742164	0.437037	0.428375	0.00866203	0.533681	0.469891	0.0637909	0.415906	0.419536	-0.00362958	0.431515	0.397675	0.0338392
cg01747155	0.222087	0.233205	-0.0111175	0.201841	0.202765	-0.00092386	0.0782538	0.0948275	-0.0165737	0.372329	0.347179	0.0251492
cg01747278	0.744713	0.761501	-0.0167881	0.508894	0.549306	-0.0404129	0.467383	0.446331	0.021052	0.876255	0.865824	0.0104302
cg01752030	0.0497921	0.0496435	0.000148635	0.0713642	0.0826992	-0.0113349	0.0872576	0.102904	-0.0156467	0.0621798	0.0557723	0.00640749
cg01752898	0.209303	0.212956	-0.00365241	0.534753	0.5758	-0.0410475	0.673013	0.68952	-0.0165071	0.534139	0.507207	0.0269323
cg01755224	0.0375348	0.0377853	-0.000250568	0.0585793	0.0443662	0.0142131	0.0660558	0.0631996	0.00285622	0.0458025	0.0399525	0.00584995
cg01756638	0.471744	0.463967	0.007777	0.274602	0.275789	-0.0011867	0.555791	0.548395	0.00739643	0.473821	0.484587	-0.0107663
cg01758988	0.553005	0.555908	-0.00290311	0.560071	0.578806	-0.0187353	0.526598	0.525343	0.00125509	0.537187	0.580891	-0.0437035
cg01759889	0.548011	0.572331	-0.0243201	0.568788	0.575205	-0.00641703	0.770248	0.780613	-0.0103651	0.541265	0.577751	-0.036486
cg01760027	0.542274	0.521792	0.0204812	0.605949	0.606475	-0.00052588	0.459867	0.452465	0.00740182	0.523298	0.480192	0.0431054
cg01760227	0.212993	0.178727	0.0342659	0.231828	0.219501	0.0123266	0.118062	0.121551	-0.00348927	0.110932	0.114254	-0.00332209
cg01761453	0.443876	0.437962	0.00591421	0.254686	0.246278	0.00840832	0.484999	0.520058	-0.0350589	0.371771	0.414124	-0.042353
cg01765758	0.374636	0.385602	-0.0109662	0.201296	0.196635	0.00466118	0.327912	0.34664	-0.0187284	0.22958	0.236637	-0.00705661
cg01768144	0.849319	0.821091	0.0282281	0.806664	0.835301	-0.0286376	0.475029	0.437052	0.0379764	0.85113	0.85922	-0.00809014
cg01771673	0.224859	0.237965	-0.0131069	0.439669	0.399164	0.0405048	0.635791	0.656494	-0.0207036	0.439165	0.399996	0.0391688
cg01776229	0.821506	0.788261	0.0332456	0.565944	0.548586	0.0173585	0.858932	0.850634	0.00829792	0.539851	0.505028	0.0348225
cg01776396	0.733615	0.688849	0.0447665	0.671783	0.620187	0.0515958	0.51888	0.507135	0.0117454	0.611068	0.572397	0.0386712
cg01777017	0.620193	0.628001	-0.00780797	0.597863	0.61742	-0.0195575	0.763254	0.784145	-0.020891	0.57847	0.603794	-0.0253239
cg01780361	0.315872	0.335124	-0.0192512	0.159873	0.162367	-0.00249318	0.568702	0.563084	0.00561724	0.452114	0.395026	0.0570875
cg01786460	0.382918	0.323867	0.0590512	0.212496	0.198826	0.0136698	0.220746	0.232527	-0.0117808	0.174636	0.165059	0.00957702
cg01792733	0.70326	0.722897	-0.0196372	0.811398	0.844494	-0.0330965	0.73267	0.770808	-0.038137	0.778824	0.817754	-0.0389305
cg01794548	0.925369	0.925524	-0.000155453	0.903546	0.897408	0.00613757	0.904878	0.911938	-0.0070597	0.926671	0.904738	0.0219327
cg01796247	0.321675	0.312281	0.00939442	0.40208	0.39939	0.00268966	0.0565316	0.0572381	-0.000706445	0.0473929	0.0487735	-0.00138068
cg01798163	0.795509	0.777301	0.0182088	0.879617	0.856612	0.023005	0.461068	0.46163	-0.000561989	0.902757	0.865687	0.0370701
cg01798375	0.117631	0.124639	-0.00700818	0.381143	0.390376	-0.00923223	0.178827	0.285478	-0.106652	0.271754	0.305426	-0.0336719
cg01804836	0.149201	0.161025	-0.0118245	0.171779	0.17029	0.00148905	0.491623	0.513195	-0.0215719	0.515194	0.473354	0.0418401
cg01807688	0.678562	0.666385	0.0121778	0.478671	0.471651	0.00701974	0.45995	0.462758	-0.00280796	0.476196	0.485769	-0.00957261
cg01809408	0.421338	0.401751	0.0195866	0.47087	0.503453	-0.0325832	0.458828	0.469499	-0.0106707	0.0701846	0.0802916	-0.0101069
cg01813224	0.0417166	0.0604432	-0.0187266	0.0758795	0.100355	-0.0244752	0.179263	0.179329	-6.59391e-05	0.0685637	0.0451677	0.023396
cg01813276	0.849453	0.808057	0.0413968	0.854977	0.837631	0.0173466	0.54607	0.515194	0.0308757	0.85775	0.832012	0.0257371
cg01813294	0.617735	0.604008	0.013727	0.618422	0.636763	-0.0183408	0.815427	0.8155	-7.35528e-05	0.497135	0.530679	-0.0335439
cg01814235	0.853592	0.827386	0.0262055	0.723727	0.718327	0.00540035	0.548272	0.562606	-0.0143339	0.810739	0.802826	0.00791291
cg01816615	0.065756	0.0708625	-0.00510645	0.0874574	0.0818357	0.00562169	0.136989	0.0973938	0.0395951	0.0829837	0.0825097	0.000474046
cg01817069	0.445145	0.423496	0.0216497	0.122117	0.110013	0.0121039	0.220606	0.233642	-0.0130364	0.45101	0.452363	-0.00135325
cg01817230	0.887429	0.878216	0.00921353	0.852144	0.887652	-0.0355086	0.875464	0.890035	-0.0145712	0.873672	0.871521	0.00215068
cg01818727	0.143977	0.138743	0.00523394	0.461245	0.467353	-0.0061078	0.170764	0.161997	0.00876681	0.166228	0.158951	0.00727718
cg01821005	0.657177	0.664352	-0.00717558	0.527607	0.500962	0.0266449	0.724167	0.692504	0.0316629	0.678425	0.66866	0.00976519
cg01821772	0.674682	0.671501	0.00318055	0.668826	0.594122	0.074704	0.49225	0.471585	0.0206656	0.667194	0.651182	0.0160122
cg01823238	0.0425823	0.0494418	-0.00685949	0.0887289	0.0986725	-0.00994356	0.109374	0.140501	-0.031127	0.0701109	0.0681649	0.00194596
cg01824095	0.864889	0.865514	-0.00062541	0.858932	0.885973	-0.0270415	0.911526	0.925818	-0.0142918	0.613047	0.668032	-0.054985
cg01828434	0.0615107	0.0662523	-0.00474155	0.092361	0.101765	-0.00940388	0.358912	0.361841	-0.00292926	0.341624	0.333373	0.00825047
cg01831944	0.508977	0.444042	0.0649352	0.473623	0.460606	0.0130168	0.0912162	0.0897408	0.00147531	0.0778218	0.0568279	0.0209938
cg01834528	0.737849	0.786092	-0.048243	0.877263	0.854517	0.0227462	0.831121	0.843326	-0.0122051	0.859115	0.807614	0.0515002
cg01843978	0.219016	0.190913	0.0281031	0.522652	0.530048	-0.00739592	0.459321	0.454474	0.00484681	0.559305	0.498647	0.0606584
cg01847754	0.0370158	0.0480238	-0.011008	0.222184	0.212665	0.00951857	0.0342631	0.0424293	-0.00816622	0.143751	0.126477	0.0172741
cg01851385	0.386599	0.375128	0.0114708	0.44293	0.415753	0.0271778	0.302881	0.339158	-0.0362768	0.149345	0.158404	-0.0090598
cg01852560	0.304508	0.287675	0.0168323	0.355168	0.348716	0.00645147	0.420341	0.453599	-0.0332572	0.544762	0.537822	0.00694053
cg01852992	0.762527	0.76891	-0.00638398	0.623967	0.607633	0.0163335	0.620376	0.602659	0.0177169	0.648022	0.647043	0.000978261
cg01854931	0.513988	0.552544	-0.0385558	0.573463	0.517536	0.0559267	0.446322	0.464029	-0.0177072	0.726872	0.747196	-0.0203239
cg01855997	0.545751	0.543717	0.00203462	0.506874	0.558368	-0.0514942	0.704971	0.702466	0.00250426	0.462834	0.448483	0.0143511
cg01856640	0.026579	0.0451411	-0.018562	0.499361	0.491877	0.00748384	0.0532425	0.0545018	-0.00125933	0.0392746	0.0318374	0.0074372
cg01857704	0.120289	0.113709	0.00658053	0.0288377	0.0360633	-0.00722555	0.0223196	0.0222553	6.42577e-05	0.0211951	0.0240869	-0.00289186
cg01859586	0.0741437	0.0736955	0.000448207	0.146177	0.144232	0.00194447	0.179522	0.228223	-0.0487007	0.0965461	0.0919693	0.00457689
cg01860821	0.668286	0.638703	0.0295824	0.432755	0.421232	0.0115225	0.399204	0.393683	0.00552031	0.680795	0.620187	0.0606075
cg01864032	0.0899945	0.0948764	-0.0048819	0.103996	0.112561	-0.00856486	0.531886	0.526623	0.0052627	0.0852697	0.0788625	0.00640727
cg01864404	0.24956	0.246355	0.00320542	0.236821	0.222965	0.0138558	0.282505	0.28785	-0.00534492	0.291539	0.2923	-0.000761652
cg01866066	0.493842	0.4901	0.0037416	0.581451	0.547873	0.0335782	0.43179	0.462913	-0.0311232	0.575558	0.524	0.0515578
cg01871025	0.53352	0.56695	-0.0334298	0.731782	0.733677	-0.00189452	0.4451	0.440425	0.00467539	0.611719	0.604867	0.0068523
cg01872771	0.926944	0.922467	0.00447622	0.92002	0.900386	0.0196336	0.917343	0.902915	0.0144282	0.893495	0.87231	0.0211844
cg01874426	0.836318	0.883048	-0.0467299	0.836157	0.833875	0.00228253	0.50611	0.498249	0.00786035	0.804049	0.860586	-0.0565369
cg01881753	0.536303	0.533381	0.00292227	0.481295	0.472494	0.00880175	0.455559	0.458142	-0.00258266	0.560887	0.541672	0.0192148
cg01882566	0.27383	0.308352	-0.0345219	0.0976128	0.101301	-0.00368832	0.505225	0.510463	-0.00523775	0.311602	0.309861	0.00174139
cg01884384	0.446995	0.435375	0.0116207	0.451874	0.481606	-0.0297317	0.384946	0.38348	0.0014659	0.314529	0.314653	-0.000124294
cg01886630	0.636021	0.650174	-0.0141526	0.566272	0.636876	-0.0706043	0.804978	0.7919	0.0130776	0.850634	0.91106	-0.0604258
cg01886810	0.899608	0.886629	0.012979	0.871411	0.873339	-0.00192777	0.454684	0.449888	0.00479617	0.888796	0.847968	0.0408284
cg01887803	0.434517	0.423124	0.011393	0.101177	0.0767494	0.0244279	0.263372	0.232041	0.0313306	0.861043	0.862917	-0.00187453
cg01888389	0.824294	0.818591	0.00570281	0.503024	0.471836	0.0311886	0.92002	0.917352	0.00266732	0.220306	0.224597	-0.00429069
cg01891172	0.665766	0.641716	0.0240508	0.644583	0.613973	0.0306101	0.790467	0.798116	-0.0076489	0.639839	0.671315	-0.0314753
cg01892695	0.261138	0.247849	0.0132886	0.495123	0.440947	0.0541763	0.406655	0.430091	-0.0234365	0.376109	0.336104	0.0400054
cg01893797	0.0867056	0.0974471	-0.0107415	0.299806	0.403863	-0.104057	0.219298	0.235335	-0.0160365	0.166685	0.22372	-0.057035
cg01896298	0.151132	0.150471	0.000661254	0.10694	0.0868803	0.02006	0.204886	0.219376	-0.0144898	0.244343	0.292737	-0.0483932
cg01905377	0.0605693	0.064787	-0.00421775	0.0994532	0.0814747	0.0179785	0.0806878	0.0956112	-0.0149234	0.069414	0.0527942	0.0166198
cg01906946	0.271415	0.261231	0.0101834	0.412511	0.409488	0.00302247	0.297082	0.291539	0.00554335	0.434152	0.413095	0.0210578
cg01908742	0.618097	0.565424	0.0526727	0.749875	0.758042	-0.00816708	0.538574	0.551712	-0.0131378	0.675963	0.692511	-0.0165479
cg01910452	0.504358	0.490659	0.0136996	0.457314	0.495935	-0.038621	0.678544	0.673435	0.00510874	0.479636	0.459534	0.0201017
cg01911846	0.387589	0.395102	-0.00751281	0.450828	0.443871	0.00695703	0.419602	0.44886	-0.0292585	0.394706	0.425637	-0.0309311
cg01913196	0.706329	0.753271	-0.0469412	0.948103	0.95607	-0.00796635	0.932042	0.937711	-0.00566841	0.56344	0.615441	-0.0520003
cg01918534	0.884962	0.891898	-0.00693547	0.860895	0.851724	0.00917113	0.855866	0.86169	-0.00582454	0.562927	0.569747	-0.00682043
cg01923531	0.744266	0.75171	-0.00744372	0.769407	0.810591	-0.0411839	0.846191	0.848599	-0.00240783	0.825566	0.824249	0.00131698
cg01924982	0.74549	0.727888	0.0176023	0.788069	0.784784	0.00328534	0.775562	0.777708	-0.00214534	0.830031	0.836611	-0.00658022
cg01927625	0.727195	0.714189	0.0130055	0.690606	0.703951	-0.0133454	0.639444	0.639415	2.92544e-05	0.698759	0.684554	0.0142047
cg01932223	0.0761394	0.0794466	-0.00330721	0.106799	0.0758126	0.0309866	0.163102	0.153198	0.00990475	0.257389	0.288188	-0.0307991
cg01947226	0.168152	0.191495	-0.0233425	0.510324	0.581685	-0.0713609	0.0479898	0.069898	-0.0219083	0.0787675	0.0596933	0.0190743
cg01951307	0.600209	0.571865	0.0283447	0.633703	0.635284	-0.00158029	0.516035	0.518631	-0.00259636	0.393325	0.398679	-0.00535462
cg01959381	0.693977	0.692946	0.00103072	0.527948	0.486884	0.0410639	0.47233	0.486102	-0.0137713	0.73508	0.730903	0.0041774
cg01960534	0.7259	0.713226	0.0126735	0.607531	0.592605	0.0149265	0.792603	0.804049	-0.0114457	0.581547	0.589197	-0.00764977
cg01961936	0.867483	0.860755	0.00672802	0.636981	0.611313	0.0256683	0.502387	0.490834	0.0115534	0.83962	0.824532	0.0150878
cg01963147	0.577618	0.554791	0.0228274	0.74824	0.745137	0.00310276	0.356935	0.359075	-0.00213961	0.566185	0.5818	-0.015615
cg01963258	0.765037	0.80772	-0.0426824	0.801915	0.808328	-0.00641371	0.836382	0.827371	0.00901159	0.831364	0.837731	-0.00636651
cg01970554	0.419159	0.459999	-0.0408401	0.27904	0.284574	-0.00553428	0.555481	0.562386	-0.00690445	0.472879	0.478137	-0.00525762
cg01971322	0.435024	0.389752	0.0452723	0.579454	0.55018	0.0292739	0.0777304	0.160175	-0.082445	0.590958	0.568906	0.0220525
cg01975035	0.92016	0.932806	-0.012646	0.907419	0.889349	0.0180707	0.888478	0.886177	0.0023008	0.910013	0.920981	-0.0109682
cg01975591	0.0764386	0.0680039	0.00843466	0.188798	0.208132	-0.0193337	0.0989399	0.0668455	0.0320943	0.324482	0.310697	0.0137847
cg01980778	0.298999	0.372862	-0.0738624	0.150301	0.202202	-0.0519012	0.162384	0.177278	-0.0148933	0.237114	0.246698	-0.00958371
cg01984250	0.492705	0.46711	0.025595	0.0500567	0.0434887	0.006568	0.434114	0.399577	0.0345374	0.387563	0.437037	-0.0494741
cg01985071	0.588235	0.531674	0.0565609	0.428671	0.480034	-0.0513631	0.55918	0.528646	0.0305343	0.427141	0.340581	0.0865593
cg01986775	0.674537	0.627923	0.0466139	0.782209	0.765808	0.0164014	0.470623	0.439912	0.0307111	0.555488	0.581478	-0.0259894
cg01987196	0.713434	0.646996	0.066438	0.564472	0.592985	-0.0285126	0.421595	0.394104	0.0274902	0.41851	0.446325	-0.0278147
cg01988541	0.831276	0.803635	0.0276411	0.803355	0.804265	-0.0009093	0.443668	0.424021	0.0196463	0.707793	0.679375	0.0284181
cg01990106	0.0267289	0.032893	-0.00616407	0.044891	0.0497154	-0.00482444	0.0393744	0.0448622	-0.00548783	0.0325365	0.0387859	-0.00624941
cg01990854	0.791863	0.813515	-0.0216522	0.2386	0.250703	-0.0121033	0.834543	0.859055	-0.0245118	0.765849	0.760585	0.00526328
cg01991530	0.163543	0.131762	0.0317803	0.625349	0.670601	-0.0452514	0.804847	0.818094	-0.0132477	0.614371	0.638532	-0.0241609
cg01993928	0.355848	0.384473	-0.0286254	0.433534	0.40991	0.023624	0.333776	0.34434	-0.0105635	0.202373	0.182985	0.0193884
cg01994890	0.474471	0.514099	-0.0396279	0.486407	0.475855	0.0105519	0.430448	0.429701	0.000746583	0.476489	0.455093	0.0213961
cg01996723	0.462491	0.469987	-0.007496	0.794244	0.801128	-0.00688344	0.498624	0.511588	-0.0129633	0.41	0.418909	-0.00890874
cg01996818	0.706864	0.679646	0.0272179	0.279451	0.314947	-0.0354958	0.516627	0.540152	-0.0235251	0.661129	0.690436	-0.0293073
cg01996909	0.567624	0.569307	-0.0016833	0.460888	0.442173	0.0187155	0.393587	0.394289	-0.000701248	0.440808	0.466184	-0.0253757
cg01997953	0.0443543	0.0462775	-0.00192315	0.0443465	0.0385236	0.0058229	0.0401833	0.0338064	0.00637687	0.0293484	0.0308674	-0.00151898
cg02007259	0.76305	0.730714	0.0323356	0.789125	0.787639	0.00148625	0.310561	0.316213	-0.00565244	0.490696	0.519206	-0.0285094
cg02010442	0.347078	0.341767	0.00531017	0.349504	0.360306	-0.0108021	0.566181	0.579641	-0.0134608	0.380773	0.347394	0.0333789
cg02012821	0.580619	0.529317	0.0513017	0.578118	0.60598	-0.0278625	0.681544	0.637089	0.0444548	0.388628	0.380232	0.00839592
cg02014085	0.495614	0.493069	0.00254527	0.55334	0.533943	0.0193969	0.0278041	0.0744101	-0.046606	0.360673	0.368549	-0.00787575
cg02015411	0.657337	0.689693	-0.0323566	0.691977	0.67233	0.019647	0.672278	0.652466	0.019812	0.680597	0.658738	0.0218595
cg02019068	0.615701	0.600757	0.014944	0.559386	0.572125	-0.012739	0.528041	0.513002	0.0150389	0.612102	0.590828	0.0212739
cg02019635	0.517989	0.52241	-0.0044203	0.461583	0.412447	0.0491357	0.573009	0.576493	-0.00348365	0.456477	0.431112	0.0253652
cg02020018	0.599707	0.564046	0.0356611	0.903118	0.885177	0.0179401	0.875027	0.870323	0.00470424	0.570178	0.50512	0.0650574
cg02022247	0.261839	0.244749	0.0170896	0.417478	0.408126	0.00935291	0.446415	0.433389	0.0130259	0.0535603	0.0608611	-0.0073008
cg02023473	0.191511	0.186992	0.00451872	0.669953	0.684554	-0.0146006	0.564472	0.554839	0.00963295	0.593432	0.578016	0.0154157
cg02025065	0.301091	0.276106	0.0249852	0.244163	0.244748	-0.000584029	0.379563	0.379733	-0.000170609	0.153334	0.143499	0.00983557
cg02025206	0.685877	0.706332	-0.0204552	0.324648	0.342924	-0.0182761	0.553782	0.563404	-0.00962154	0.190724	0.182562	0.00816175
cg02026371	0.351608	0.364681	-0.0130735	0.182732	0.164206	0.0185254	0.126862	0.0894305	0.0374318	0.231542	0.229165	0.0023771
cg02032561	0.527427	0.578937	-0.05151	0.621169	0.573379	0.0477896	0.7676	0.674842	0.0927578	0.486748	0.457489	0.029259
cg02033323	0.675021	0.706866	-0.0318446	0.88264	0.898266	-0.0156265	0.880002	0.875945	0.00405662	0.54516	0.502825	0.0423351
cg02035698	0.380388	0.387755	-0.00736634	0.917938	0.926082	-0.008144	0.21665	0.224022	-0.00737246	0.136302	0.129874	0.00642824
cg02042142	0.526946	0.530476	-0.00352968	0.603862	0.624539	-0.0206772	0.762856	0.762934	-7.72666e-05	0.594341	0.582882	0.0114584
cg02042698	0.89602	0.903109	-0.00708885	0.849392	0.846439	0.0029534	0.895516	0.884957	0.0105593	0.936525	0.88895	0.0475746
cg02048654	0.0837428	0.0803033	0.00343952	0.341493	0.36571	-0.0242176	0.0417018	0.0281944	0.0135074	0.168848	0.179228	-0.0103803
cg02053896	0.309654	0.331298	-0.0216437	0.421451	0.415477	0.00597414	0.550973	0.572185	-0.0212115	0.351001	0.387832	-0.0368304
cg02054710	0.823362	0.762665	0.0606966	0.918965	0.912125	0.00683953	0.725149	0.679451	0.0456979	0.927233	0.926476	0.000757259
cg02055404	0.859389	0.85517	0.00421888	0.655637	0.646267	0.00936973	0.910622	0.911679	-0.00105711	0.917946	0.91989	-0.00194465
cg02058632	0.357253	0.335429	0.0218238	0.0523396	0.127148	-0.0748085	0.806134	0.787179	0.0189555	0.31983	0.288946	0.0308842
cg02059755	0.0494553	0.053017	-0.00356175	0.0390578	0.0340872	0.00497053	0.337227	0.33295	0.00427735	0.076153	0.0745193	0.00163367
cg02060618	0.044549	0.0390592	0.00548983	0.0482373	0.0522681	-0.00403086	0.0397769	0.0588564	-0.0190795	0.033714	0.0284256	0.00528835
cg02063752	0.703059	0.681372	0.0216866	0.521146	0.541178	-0.0200323	0.751958	0.773208	-0.02125	0.481172	0.463096	0.0180757
cg02068976	0.824579	0.769213	0.0553666	0.509887	0.555946	-0.0460591	0.814538	0.811303	0.00323472	0.734564	0.768453	-0.0338884
cg02077027	0.547818	0.545974	0.0018444	0.491857	0.493709	-0.0018526	0.353963	0.366233	-0.0122704	0.614572	0.62467	-0.0100974
cg02079156	0.653403	0.668132	-0.0147291	0.797074	0.756099	0.0409752	0.676011	0.596252	0.0797593	0.779401	0.786965	-0.00756414
cg02082650	0.877137	0.876773	0.000364082	0.504047	0.478062	0.0259852	0.74865	0.767441	-0.0187907	0.634965	0.647513	-0.0125475
cg02095003	0.520264	0.566896	-0.0466326	0.546629	0.583254	-0.0366254	0.676764	0.684009	-0.00724433	0.48539	0.486839	-0.00144922
cg02095995	0.533643	0.50306	0.0305834	0.516627	0.563074	-0.0464474	0.684906	0.718418	-0.0335113	0.156609	0.159968	-0.00335831
cg02096520	0.664944	0.65959	0.00535358	0.821449	0.809766	0.011683	0.402885	0.406022	-0.00313779	0.546735	0.526739	0.0199953
cg02110822	0.620407	0.603475	0.0169325	0.488459	0.498327	-0.00986831	0.522363	0.521961	0.000402232	0.276221	0.255342	0.0208784
cg02112649	0.0672472	0.0738022	-0.006555	0.382149	0.381113	0.00103591	0.119621	0.123372	-0.00375151	0.2055	0.209955	-0.00445469
cg02117996	0.581875	0.619917	-0.0380428	0.480303	0.481821	-0.00151771	0.915663	0.91314	0.00252261	0.483241	0.49122	-0.00797915
cg02120013	0.524834	0.556039	-0.0312052	0.409332	0.408997	0.00033443	0.595757	0.587637	0.00811964	0.771435	0.811269	-0.0398342
cg02120046	0.531606	0.516738	0.0148677	0.536314	0.548085	-0.0117717	0.577102	0.596099	-0.0189968	0.53378	0.495423	0.0383571
cg02121672	0.0594992	0.0484664	0.0110328	0.0844027	0.0754647	0.00893798	0.155982	0.150255	0.00572715	0.0527499	0.0705346	-0.0177847
cg02124059	0.368181	0.371002	-0.00282162	0.310281	0.359227	-0.0489457	0.582658	0.631075	-0.0484171	0.280276	0.346855	-0.0665787
cg02124085	0.46922	0.461508	0.00771216	0.448678	0.430741	0.0179366	0.44154	0.432298	0.00924212	0.459339	0.412712	0.0466271
cg02127807	0.42429	0.429619	-0.00532907	0.4539	0.429763	0.0241371	0.148603	0.17357	-0.024967	0.103025	0.113071	-0.010046
cg02132188	0.445816	0.442858	0.0029579	0.510205	0.520581	-0.0103768	0.383808	0.383407	0.000401287	0.33597	0.325026	0.0109437
cg02148711	0.468324	0.466902	0.00142221	0.492227	0.503363	-0.0111362	0.629229	0.673773	-0.0445442	0.495508	0.481707	0.0138012
cg02150469	0.26034	0.25145	0.00889001	0.131136	0.121897	0.00923827	0.241585	0.241637	-5.20568e-05	0.252094	0.263975	-0.0118813
cg02151408	0.919085	0.899164	0.0199212	0.875919	0.882232	-0.00631222	0.475276	0.480334	-0.00505839	0.919108	0.91867	0.000438684
cg02151779	0.1118	0.0973402	0.0144594	0.318716	0.357664	-0.038948	0.0202956	0.0425174	-0.0222218	0.223542	0.219501	0.00404074
cg02154531	0.187903	0.207305	-0.0194017	0.0855559	0.100684	-0.015128	0.13983	0.133562	0.00626849	0.331787	0.385361	-0.0535739
cg02155838	0.284946	0.280296	0.00464999	0.16181	0.142333	0.0194766	0.495905	0.475069	0.020836	0.188338	0.217205	-0.0288674
cg02161824	0.176568	0.148727	0.0278411	0.159668	0.16124	-0.0015723	0.429716	0.449111	-0.0193953	0.144194	0.144398	-0.000204601
cg02165720	0.503598	0.484826	0.0187724	0.441908	0.472953	-0.0310447	0.639712	0.667962	-0.02825	0.414507	0.412447	0.00205952
cg02166322	0.389727	0.37829	0.0114369	0.274248	0.275125	-0.00087748	0.490056	0.496661	-0.00660474	0.317676	0.298991	0.0186849
cg02167358	0.186156	0.191035	-0.00487831	0.202968	0.205553	-0.00258506	0.0929262	0.0690595	0.0238667	0.130577	0.118473	0.0121042
cg02167456	0.173688	0.1829	-0.00921188	0.422972	0.391619	0.0313529	0.270578	0.297296	-0.0267182	0.428052	0.432076	-0.00402427
cg02168925	0.872105	0.815991	0.0561144	0.854663	0.875659	-0.0209953	0.961801	0.925541	0.0362601	0.845947	0.874341	-0.0283939
cg02169289	0.616885	0.607496	0.00938858	0.85084	0.857444	-0.00660463	0.866425	0.879055	-0.0126301	0.679451	0.685915	-0.00646334
cg02171705	0.0446061	0.0365722	0.00803381	0.0541967	0.0510268	0.00316982	0.059624	0.0357723	0.0238516	0.0355766	0.0342048	0.0013718
cg02173072	0.238165	0.229873	0.00829203	0.580707	0.585079	-0.00437249	0.0566995	0.0604974	-0.00379781	0.267853	0.232359	0.0354943
cg02177607	0.774443	0.768166	0.00627667	0.446611	0.456259	-0.00964765	0.610368	0.573309	0.0370594	0.708027	0.717368	-0.00934088
cg02179029	0.887957	0.905235	-0.0172785	0.867211	0.838049	0.0291616	0.803965	0.828799	-0.0248344	0.9062	0.888291	0.0179091
cg02179438	0.492808	0.548205	-0.0553963	0.559137	0.538771	0.0203664	0.683859	0.65911	0.0247491	0.499863	0.551032	-0.0511684
cg02180347	0.432434	0.454304	-0.0218692	0.639235	0.640676	-0.00144192	0.250107	0.221771	0.028336	0.47731	0.407363	0.0699466
cg02180853	0.0236259	0.023451	0.000174865	0.0423546	0.0590236	-0.016669	0.0558854	0.0526401	0.00324527	0.0453052	0.0450538	0.000251486
cg02184147	0.842718	0.86205	-0.0193329	0.870629	0.902557	-0.0319283	0.874743	0.897049	-0.0223057	0.798428	0.786403	0.0120251
cg02185190	0.111391	0.105017	0.00637358	0.572092	0.521114	0.0509778	0.62005	0.571523	0.0485267	0.0568176	0.0634843	-0.00666667
cg02188048	0.16718	0.1437	0.0234801	0.20081	0.233137	-0.0323268	0.470096	0.492236	-0.0221401	0.201715	0.231458	-0.0297437
cg02188515	0.828636	0.816157	0.0124794	0.749121	0.727237	0.0218839	0.599523	0.638602	-0.0390785	0.902572	0.921917	-0.019345
cg02188860	0.625851	0.645183	-0.0193317	0.620892	0.623873	-0.00298109	0.505278	0.481033	0.0242448	0.616317	0.560311	0.0560055
cg02189483	0.711088	0.669181	0.0419069	0.656045	0.676801	-0.0207567	0.50407	0.476196	0.0278743	0.606196	0.597279	0.00891624
cg02193580	0.277934	0.337918	-0.0599837	0.407724	0.405212	0.00251164	0.47087	0.47533	-0.00446043	0.642678	0.657122	-0.0144438
cg02195925	0.765249	0.763219	0.00203015	0.575491	0.609012	-0.0335208	0.33041	0.305181	0.0252289	0.739825	0.739472	0.000352873
cg02198544	0.879057	0.878872	0.000184756	0.879847	0.876862	0.0029857	0.892461	0.893131	-0.000670565	0.852767	0.856038	-0.00327088
cg02200373	0.279663	0.287131	-0.00746733	0.387354	0.38795	-0.000596494	0.483025	0.511839	-0.0288141	0.244063	0.231641	0.012422
cg02201836	0.46606	0.49905	-0.0329898	0.46206	0.480192	-0.018132	0.665144	0.706556	-0.0414114	0.478211	0.523828	-0.0456168
cg02205962	0.661321	0.63597	0.0253512	0.628485	0.648332	-0.0198467	0.806865	0.801751	0.00511387	0.632988	0.635628	-0.00264074
cg02210067	0.341036	0.387261	-0.0462258	0.133322	0.140909	-0.00758662	0.155181	0.179465	-0.0242836	0.161699	0.178481	-0.0167817
cg02211783	0.15135	0.160613	-0.00926323	0.100233	0.0698137	0.0304193	0.419056	0.43279	-0.0137341	0.560226	0.511633	0.0485931
cg02211869	0.608632	0.594928	0.0137042	0.767204	0.76943	-0.00222629	0.465137	0.4689	-0.00376238	0.542853	0.522338	0.020515
cg02212907	0.779157	0.797686	-0.0185285	0.768677	0.759224	0.00945301	0.495762	0.482639	0.0131231	0.556253	0.546759	0.00949336
cg02213813	0.506583	0.532822	-0.0262391	0.481406	0.509912	-0.0285053	0.525329	0.539273	-0.0139437	0.469091	0.475513	-0.00642202
cg02214597	0.213434	0.186046	0.0273874	0.291164	0.290275	0.00088981	0.630848	0.639621	-0.00877272	0.537488	0.582515	-0.0450269
cg02215374	0.760222	0.73264	0.0275822	0.704971	0.678783	0.0261882	0.834425	0.840103	-0.00567784	0.683783	0.697517	-0.0137342
cg02216057	0.575021	0.602531	-0.0275093	0.612938	0.637258	-0.0243194	0.793349	0.781082	0.0122672	0.81359	0.697915	0.115675
cg02223323	0.627905	0.627287	0.000618051	0.166456	0.180762	-0.0143057	0.515919	0.525405	-0.00948662	0.714785	0.756423	-0.0416382
cg02229344	0.467344	0.474379	-0.00703441	0.347597	0.35309	-0.00549276	0.434019	0.442045	-0.00802642	0.460442	0.456378	0.00406422
cg02232922	0.0385382	0.0422161	-0.00367794	0.0445592	0.0482355	-0.00367632	0.0564143	0.0436741	0.0127402	0.0478599	0.0400377	0.00782215
cg02233493	0.55202	0.551072	0.000948752	0.689896	0.699915	-0.0100185	0.486176	0.455156	0.0310201	0.550794	0.569066	-0.0182726
cg02239640	0.365214	0.371743	-0.00652872	0.222562	0.204715	0.0178476	0.219166	0.222395	-0.00322887	0.173742	0.17175	0.00199146
cg02263204	0.860679	0.857959	0.0027193	0.663202	0.59604	0.0671614	0.500328	0.498581	0.00174695	0.576244	0.541073	0.0351702
cg02263717	0.0366944	0.0308434	0.00585103	0.0550918	0.0429585	0.0121334	0.0670494	0.0655993	0.00145004	0.0432111	0.0422778	0.000933266
cg02264284	0.249212	0.262888	-0.0136758	0.492688	0.50168	-0.00899179	0.261194	0.26232	-0.00112558	0.460529	0.441138	0.0193907
cg02265919	0.464989	0.469357	-0.0043676	0.524473	0.502425	0.0220484	0.242781	0.256507	-0.0137261	0.490614	0.471651	0.0189629
cg02266197	0.478101	0.454183	0.023918	0.476805	0.503104	-0.026299	0.502827	0.501152	0.00167459	0.433927	0.428216	0.00571037
cg02272668	0.808359	0.80027	0.00808832	0.660555	0.60608	0.0544753	0.740368	0.742575	-0.00220743	0.567821	0.549817	0.0180043
cg02273788	0.858139	0.850211	0.00792813	0.836054	0.837631	-0.00157714	0.867211	0.855027	0.0121837	0.822803	0.823858	-0.0010553
cg02275875	0.14284	0.142758	8.18712e-05	0.239356	0.239043	0.000312615	0.260213	0.273998	-0.0137854	0.172323	0.227317	-0.0549941
cg02275924	0.15031	0.175161	-0.0248513	0.154824	0.156203	-0.00137946	0.306756	0.289931	0.0168245	0.0635597	0.056565	0.00699466
cg02279124	0.341726	0.333676	0.00805048	0.275852	0.262554	0.0132984	0.181827	0.191887	-0.0100603	0.0806688	0.0672409	0.0134279
cg02283106	0.174322	0.172292	0.0020291	0.194373	0.20461	-0.0102372	0.183972	0.202373	-0.0184013	0.27769	0.276737	0.00095318
cg02301364	0.448654	0.464799	-0.0161452	0.45891	0.46615	-0.00723961	0.589739	0.601024	-0.0112846	0.449111	0.455707	-0.00659568
cg02308199	0.489706	0.495428	-0.00572176	0.57073	0.539347	0.031383	0.479529	0.445545	0.0339842	0.0910117	0.0759018	0.0151099
cg02311013	0.426801	0.412692	0.0141084	0.681394	0.706914	-0.0255203	0.242505	0.242919	-0.000414516	0.387991	0.353915	0.0340762
cg02318959	0.126841	0.126239	0.000602271	0.311219	0.2995	0.0117197	0.332564	0.340644	-0.0080805	0.0555163	0.0539196	0.00159668
cg02326006	0.0733861	0.0771548	-0.00376867	0.394722	0.379038	0.0156837	0.0532878	0.0430124	0.0102754	0.0399489	0.0244467	0.0155023
cg02329520	0.646013	0.57928	0.0667332	0.58886	0.580387	0.00847342	0.28025	0.289793	-0.00954344	0.632432	0.618836	0.0135962
cg02336026	0.187455	0.216683	-0.0292278	0.0914409	0.124046	-0.0326055	0.0577874	0.0425658	0.0152216	0.157281	0.171586	-0.0143058
cg02336608	0.416112	0.403619	0.0124932	0.415789	0.42471	-0.00892114	0.304853	0.309948	-0.00509547	0.456023	0.45608	-5.7035e-05
cg02337670	0.454288	0.488117	-0.0338287	0.437968	0.443636	-0.00566776	0.608256	0.641756	-0.0334997	0.427828	0.424081	0.00374664
cg02341380	0.85671	0.834302	0.0224078	0.792603	0.76897	0.023633	0.622163	0.582991	0.0391718	0.795918	0.811616	-0.0156986
cg02345317	0.914747	0.903278	0.011469	0.89989	0.828901	0.0709887	0.946345	0.935684	0.0106619	0.923429	0.910897	0.0125324
cg02350883	0.794285	0.810062	-0.0157763	0.837342	0.822023	0.0153195	0.839227	0.84242	-0.00319296	0.846873	0.822296	0.0245768
cg02352295	0.253417	0.19544	0.0579764	0.40409	0.393267	0.010823	0.0657334	0.0564049	0.00932847	0.0370001	0.045472	-0.00847185
cg02362246	0.0261586	0.027431	-0.00127232	0.038134	0.0328452	0.00528885	0.0458308	0.0485123	-0.00268149	0.0394642	0.0326288	0.00683537
cg02370478	0.554806	0.577933	-0.0231265	0.131885	0.0995698	0.0323147	0.196878	0.162378	0.0344998	0.452819	0.456015	-0.0031962
cg02379437	0.061824	0.0726838	-0.0108597	0.0496395	0.0568806	-0.00724109	0.0632516	0.0684581	-0.00520642	0.153721	0.1382	0.0155218
cg02388446	0.650058	0.569556	0.0805029	0.553459	0.573501	-0.0200422	0.483429	0.474651	0.00877858	0.206793	0.243602	-0.0368087
cg02392508	0.90443	0.895799	0.00863116	0.833451	0.800324	0.033127	0.809745	0.798331	0.0114141	0.934846	0.810868	0.123978
cg02395364	0.510548	0.492092	0.0184564	0.552142	0.513887	0.0382557	0.667889	0.666071	0.00181789	0.275891	0.268395	0.00749555
cg02396917	0.832851	0.796704	0.0361472	0.783115	0.769269	0.0138457	0.815048	0.797983	0.0170646	0.81748	0.835301	-0.0178208
cg02402307	0.52417	0.497036	0.027134	0.141227	0.133354	0.00787308	0.20312	0.185448	0.017672	0.491401	0.47025	0.0211508
cg02416822	0.207868	0.171059	0.0368089	0.108434	0.102536	0.00589794	0.292046	0.289512	0.00253407	0.0819555	0.0787822	0.00317328
cg02419467	0.634648	0.63176	0.0028879	0.564714	0.551272	0.0134428	0.449796	0.451534	-0.00173788	0.603308	0.569283	0.034025
cg02424670	0.802398	0.804166	-0.00176859	0.835389	0.861399	-0.02601	0.450923	0.435787	0.0151361	0.845166	0.859512	-0.0143457
cg02425869	0.881393	0.84558	0.0358138	0.815999	0.845009	-0.0290105	0.860573	0.84582	0.014752	0.743193	0.684736	0.0584566
cg02433685	0.488019	0.48586	0.00215819	0.206904	0.204057	0.00284672	0.294207	0.283173	0.0110335	0.227677	0.237035	-0.00935704
cg02433927	0.410686	0.42139	-0.0107046	0.1749	0.180352	-0.00545201	0.266913	0.277278	-0.0103657	0.585145	0.559264	0.0258814
cg02437314	0.482783	0.466147	0.0166356	0.808899	0.83258	-0.0236813	0.797945	0.789373	0.00857181	0.44812	0.408391	0.0397293
cg02438576	0.343925	0.347894	-0.00396923	0.477276	0.470954	0.00632132	0.474029	0.467467	0.00656192	0.234214	0.248936	-0.0147222
cg02442693	0.869232	0.883168	-0.0139361	0.562922	0.546571	0.016351	0.902741	0.908222	-0.00548113	0.483477	0.520644	-0.0371661
cg02447370	0.575658	0.600162	-0.0245044	0.500109	0.520752	-0.0206434	0.669328	0.619066	0.0502619	0.828799	0.797554	0.0312451
cg02454309	0.0815122	0.0747963	0.0067159	0.0683943	0.0579711	0.0104232	0.153283	0.172889	-0.0196062	0.110829	0.112561	-0.00173214
cg02456261	0.119122	0.140282	-0.0211596	0.073427	0.0871097	-0.0136827	0.613278	0.618157	-0.00487842	0.439854	0.448979	-0.00912487
cg02457752	0.835966	0.829734	0.00623132	0.863318	0.848758	0.0145598	0.858408	0.859535	-0.00112722	0.867154	0.870974	-0.00382
cg02458532	0.460508	0.463392	-0.00288453	0.404669	0.436736	-0.0320668	0.807496	0.824442	-0.0169465	0.339459	0.415656	-0.0761971
cg02459151	0.924242	0.944417	-0.0201753	0.950568	0.924257	0.0263114	0.926075	0.923429	0.00264633	0.939758	0.960652	-0.020894
cg02459704	0.715278	0.700943	0.014335	0.547933	0.594597	-0.0466636	0.812172	0.805774	0.00639781	0.26885	0.273312	-0.00446232
cg02469604	0.209647	0.215284	-0.00563662	0.3742	0.363322	0.0108781	0.0800985	0.0895811	-0.00948259	0.140962	0.150517	-0.00955517
cg02471578	0.938608	0.929375	0.00923254	0.929378	0.90075	0.0286273	0.943021	0.939486	0.00353543	0.892588	0.910627	-0.0180396
cg02492445	0.805886	0.796896	0.00899065	0.772787	0.772179	0.000608386	0.587945	0.605269	-0.0173235	0.395281	0.38088	0.0144018
cg02492740	0.390541	0.375531	0.0150104	0.373182	0.365341	0.00784082	0.611487	0.58363	0.0278571	0.413342	0.437294	-0.0239517
cg02494853	0.0974057	0.0966091	0.000796555	0.0257777	0.0267274	-0.000949704	0.289909	0.295451	-0.00554184	0.0274275	0.0282482	-0.000820747
cg02495057	0.431158	0.374569	0.0565892	0.390576	0.41516	-0.0245844	0.796117	0.774593	0.0215241	0.233375	0.27385	-0.0404751
cg02495306	0.164658	0.180624	-0.0159658	0.18025	0.193831	-0.0135809	0.0610458	0.0910117	-0.0299659	0.196573	0.205434	-0.00886119
cg02495445	0.74509	0.744246	0.000843735	0.777342	0.772939	0.0044038	0.732271	0.77502	-0.0427488	0.706844	0.69354	0.0133042
cg02497062	0.0640285	0.0688259	-0.00479743	0.135972	0.127715	0.0082568	0.415382	0.417339	-0.00195685	0.0894846	0.0960648	-0.00658025
cg02498747	0.424693	0.456076	-0.0313836	0.480875	0.447684	0.0331909	0.522323	0.517984	0.00433931	0.437374	0.389441	0.0479328
cg02501924	0.167713	0.186262	-0.0185489	0.440141	0.428803	0.0113374	0.110313	0.127813	-0.0174996	0.429701	0.400494	0.0292079
cg02504617	0.108414	0.121693	-0.0132799	0.0703871	0.0702503	0.000136774	0.0960727	0.0437269	0.0523458	0.442045	0.434047	0.00799813
cg02505036	0.505979	0.513163	-0.0071838	0.528093	0.494584	0.0335092	0.452052	0.457613	-0.00556108	0.379555	0.345915	0.0336399
cg02506527	0.0965587	0.0985738	-0.00201509	0.119675	0.126303	-0.00662776	0.313382	0.319992	-0.00661086	0.164138	0.155023	0.00911527
cg02510708	0.635947	0.647904	-0.011957	0.584889	0.637387	-0.052498	0.785645	0.806925	-0.0212804	0.572185	0.613849	-0.0416648
cg02512611	0.46408	0.46066	0.00342036	0.0740592	0.076643	-0.00258377	0.0805314	0.0988948	-0.0183633	0.612686	0.606377	0.00630897
cg02514307	0.452172	0.43519	0.0169817	0.479022	0.428538	0.0504842	0.105655	0.174965	-0.0693106	0.0957519	0.0910286	0.00472327
cg02522370	0.584739	0.574705	0.0100342	0.586188	0.562261	0.0239277	0.30729	0.31402	-0.00672939	0.567375	0.595957	-0.0285816
cg02523105	0.346075	0.345865	0.000209781	0.197125	0.147209	0.0499151	0.415692	0.403385	0.0123074	0.321494	0.317215	0.00427971
cg02529390	0.898769	0.892174	0.00659509	0.852871	0.873107	-0.0202353	0.872989	0.86122	0.0117694	0.914982	0.897408	0.0175743
cg02534780	0.10252	0.101805	0.000714533	0.405595	0.37502	0.0305753	0.393348	0.434698	-0.0413501	0.262057	0.261343	0.000713743
cg02537091	0.853519	0.859411	-0.00589188	0.819126	0.830203	-0.0110768	0.839475	0.829123	0.0103519	0.824788	0.845728	-0.0209403
cg02537612	0.203322	0.176423	0.0268989	0.211341	0.207922	0.00341911	0.185686	0.20214	-0.0164547	0.275017	0.285571	-0.0105543
cg02540826	0.636893	0.609881	0.0270123	0.622313	0.644021	-0.0217075	0.794244	0.792859	0.00138554	0.595573	0.62185	-0.026277
cg02543363	0.19857	0.189555	0.00901432	0.285995	0.288946	-0.00295025	0.150494	0.0916385	0.0588555	0.193338	0.167338	0.026
cg02546818	0.030951	0.0289932	0.00195781	0.0391337	0.0479883	-0.00885459	0.0465225	0.0266864	0.0198361	0.0308706	0.0490009	-0.0181303
cg02547155	0.750262	0.726278	0.023984	0.535447	0.5241	0.0113472	0.442981	0.415594	0.0273865	0.635448	0.633968	0.00148015
cg02547167	0.900358	0.894269	0.00608909	0.606397	0.607265	-0.000868424	0.929378	0.902389	0.0269883	0.505156	0.51351	-0.00835432
cg02547323	0.579643	0.583291	-0.00364807	0.316716	0.316815	-9.91576e-05	0.728151	0.703238	0.0249125	0.621541	0.635972	-0.0144306
cg02549418	0.840372	0.821759	0.0186135	0.263579	0.246462	0.017117	0.840586	0.859938	-0.0193519	0.635631	0.619025	0.0166064
cg02559685	0.408738	0.366601	0.0421373	0.630721	0.642274	-0.0115534	0.634523	0.604721	0.0298022	0.574141	0.593083	-0.018941
cg02560273	0.57236	0.549933	0.0224266	0.600507	0.5654	0.0351066	0.437213	0.435176	0.00203718	0.705784	0.727855	-0.0220711
cg02564124	0.827293	0.886907	-0.0596139	0.851528	0.853106	-0.00157807	0.864556	0.878501	-0.0139445	0.890321	0.863903	0.0264175
cg02569468	0.894647	0.896192	-0.00154544	0.859048	0.876332	-0.0172842	0.816749	0.793284	0.0234653	0.876882	0.912584	-0.0357019
cg02573613	0.566621	0.530063	0.0365581	0.46409	0.484072	-0.0199825	0.746762	0.719564	0.0271984	0.498994	0.526819	-0.0278244
cg02575859	0.0381463	0.0434934	-0.00534716	0.0600439	0.052542	0.00750186	0.069039	0.0689053	0.000133651	0.0434093	0.0661625	-0.0227532
cg02576548	0.79369	0.787567	0.00612339	0.867747	0.880967	-0.0132203	0.840267	0.839578	0.000689575	0.869802	0.869322	0.000479621
cg02579620	0.411273	0.409558	0.00171484	0.374436	0.383914	-0.00947764	0.545238	0.548057	-0.00281884	0.324039	0.341154	-0.0171155
cg02581653	0.499591	0.507583	-0.00799218	0.42354	0.460782	-0.0372413	0.668987	0.692708	-0.0237218	0.464369	0.504415	-0.0400463
cg02581727	0.0924153	0.0923701	4.52155e-05	0.184188	0.193386	-0.00919761	0.455959	0.465599	-0.00963938	0.136535	0.141275	-0.0047395
cg02582887	0.730844	0.729158	0.00168643	0.522972	0.537717	-0.014745	0.481808	0.491092	-0.00928388	0.615517	0.623152	-0.00763504
cg02586883	0.0529032	0.0436167	0.00928642	0.0510285	0.0716524	-0.0206239	0.233981	0.226387	0.00759416	0.0629526	0.053775	0.00917766
cg02590287	0.0252641	0.0284267	-0.00316254	0.0263572	0.0345617	-0.00820451	0.0362362	0.0253161	0.0109201	0.0236566	0.0216631	0.00199349
cg02590710	0.552373	0.52598	0.0263929	0.485256	0.500525	-0.0152687	0.537783	0.543856	-0.00607305	0.380469	0.37416	0.00630848
cg02599583	0.649675	0.722286	-0.0726102	0.632833	0.576509	0.0563248	0.433293	0.405895	0.0273981	0.576164	0.59549	-0.0193259
cg02600622	0.046645	0.0432812	0.00336383	0.0483519	0.0436773	0.00467463	0.046354	0.0652126	-0.0188586	0.0486833	0.042881	0.00580232
cg02602300	0.174148	0.1956	-0.021452	0.512667	0.516855	-0.00418788	0.601374	0.619169	-0.0177947	0.441415	0.47465	-0.0332354
cg02603022	0.558739	0.567603	-0.00886433	0.449469	0.470054	-0.0205851	0.247567	0.243484	0.00408237	0.45996	0.498587	-0.0386263
cg02604836	0.270074	0.295494	-0.0254203	0.681063	0.675896	0.00516638	0.0747866	0.0721343	0.00265228	0.300083	0.2923	0.00778255
cg02611122	0.434021	0.447856	-0.0138355	0.773686	0.75544	0.0182461	0.332941	0.327165	0.00577595	0.615387	0.619344	-0.00395689
cg02616921	0.504406	0.501965	0.00244091	0.444248	0.434471	0.00977621	0.0679961	0.0750674	-0.00707132	0.0747577	0.0710111	0.00374651
cg02625237	0.826831	0.779282	0.0475493	0.890684	0.881732	0.00895151	0.391205	0.39657	-0.00536445	0.833354	0.781706	0.0516477
cg02629737	0.887234	0.867104	0.0201305	0.901378	0.902151	-0.000773375	0.929172	0.913015	0.0161569	0.91146	0.892091	0.0193692
cg02634141	0.0330598	0.0323773	0.000682515	0.0406734	0.0375172	0.00315626	0.0405116	0.0360483	0.00446338	0.038631	0.0623551	-0.0237241
cg02634916	0.352352	0.337301	0.0150511	0.4391	0.452425	-0.0133259	0.383977	0.388408	-0.00443131	0.0989896	0.112894	-0.013904
cg02637882	0.569328	0.541514	0.0278142	0.625621	0.602223	0.0233974	0.461663	0.510851	-0.0491883	0.592683	0.511288	0.0813952
cg02644889	0.85304	0.798606	0.0544341	0.601452	0.561643	0.0398093	0.847626	0.858867	-0.0112408	0.842668	0.865421	-0.0227529
cg02645343	0.560737	0.54569	0.0150467	0.509324	0.542536	-0.0332124	0.743865	0.706431	0.037434	0.394377	0.423596	-0.0292193
cg02647401	0.481938	0.46757	0.0143671	0.470685	0.491487	-0.0208017	0.61494	0.606333	0.0086069	0.343059	0.345078	-0.00201917
cg02649608	0.501335	0.496578	0.00475705	0.447483	0.47208	-0.0245969	0.608972	0.631773	-0.0228012	0.492975	0.489978	0.00299672
cg02651788	0.531302	0.498941	0.0323601	0.547691	0.59653	-0.048839	0.719717	0.693673	0.0260443	0.505545	0.525065	-0.01952
cg02665388	0.817792	0.826684	-0.00889149	0.654462	0.650742	0.00371994	0.695511	0.72624	-0.0307297	0.809976	0.778437	0.0315397
cg02671603	0.476628	0.459595	0.0170337	0.0607297	0.0720426	-0.0113129	0.449282	0.472843	-0.0235605	0.494518	0.526286	-0.0317688
cg02690554	0.0968243	0.105193	-0.00836902	0.0378663	0.0487735	-0.0109072	0.0928676	0.0874839	0.00538365	0.0439422	0.0587256	-0.0147834
cg02693068	0.413188	0.425881	-0.0126931	0.158971	0.148811	0.0101603	0.421652	0.41248	0.00917189	0.417579	0.42305	-0.00547061
cg02698615	0.250664	0.26528	-0.0146158	0.429307	0.47867	-0.0493637	0.409332	0.400173	0.00915837	0.26088	0.277817	-0.0169375
cg02699127	0.136043	0.129655	0.00638764	0.111896	0.0844391	0.0274573	0.548869	0.56117	-0.0123004	0.177441	0.16963	0.00781128
cg02702444	0.0337498	0.0376971	-0.00394731	0.0355981	0.0357746	-0.000176551	0.0345964	0.0389811	-0.00438473	0.0222553	0.0278126	-0.00555729
cg02710173	0.83196	0.82628	0.00567974	0.936364	0.922886	0.0134775	0.911921	0.903559	0.00836194	0.931073	0.885331	0.0457415
cg02712399	0.473945	0.491174	-0.0172291	0.474786	0.467172	0.00761377	0.427925	0.4428	-0.0148747	0.516934	0.530309	-0.0133753
cg02714492	0.18772	0.17954	0.00818012	0.458757	0.42305	0.0357079	0.257914	0.261512	-0.00359873	0.135859	0.161916	-0.026057
cg02725485	0.823182	0.854308	-0.0311256	0.885885	0.896317	-0.0104322	0.0889929	0.118031	-0.0290378	0.86584	0.864302	0.00153767
cg02725692	0.48371	0.501925	-0.0182154	0.178827	0.186348	-0.00752194	0.447028	0.442294	0.00473354	0.330037	0.35253	-0.0224936
cg02726808	NA	NA	NA	0.325155	NA	NA	0.0859538	0.105989	-0.0200354	0.0758004	0.0528356	0.0229649
cg02732801	0.353796	0.354618	-0.000822487	0.171415	0.175752	-0.00433716	0.374333	0.3838	-0.00946612	0.3901	0.410076	-0.0199757
cg02733659	0.470615	0.466681	0.00393353	0.363199	0.357417	0.00578186	0.0701983	0.0933379	-0.0231396	0.377835	0.338836	0.0389993
cg02734755	0.330401	0.351862	-0.0214612	0.351475	0.373512	-0.0220375	0.536377	0.53143	0.00494655	0.332769	0.322587	0.0101814
cg02741829	0.323369	0.306556	0.0168132	0.115872	0.0862766	0.0295958	0.430764	0.453135	-0.0223707	0.366049	0.386661	-0.0206125
cg02742990	0.180857	0.179668	0.001189	0.410207	0.383462	0.0267453	0.213139	0.208645	0.00449419	0.0979846	0.100465	-0.00248012
cg02743552	0.537016	0.522125	0.0148912	0.630359	0.661848	-0.031489	0.413493	0.432996	-0.0195032	0.647805	0.649338	-0.00153217
cg02746718	0.915812	0.920856	-0.00504443	0.70061	0.69422	0.00638959	0.913971	0.941096	-0.0271254	0.870125	0.890021	-0.0198957
cg02752267	0.0749231	0.0695783	0.00534477	0.463262	0.459337	0.00392485	0.116947	0.115313	0.00163397	0.102797	0.125605	-0.0228084
cg02754763	0.954001	0.943371	0.0106299	0.923587	0.926476	-0.00288828	0.948247	0.909869	0.0383779	0.938235	0.940877	-0.00264212
cg02756254	0.872381	0.891033	-0.0186517	0.803774	0.839604	-0.0358299	0.505913	0.516651	-0.010738	0.910193	0.872171	0.0380219
cg02756511	0.498777	0.490935	0.00784244	0.47744	0.489879	-0.0124396	0.60449	0.608306	-0.00381584	0.491201	0.508248	-0.0170476
cg02758183	0.76181	0.774809	-0.0129991	0.587506	0.59507	-0.00756406	0.75674	0.769474	-0.0127343	0.725223	0.782235	-0.0570125
cg02763888	0.901025	0.889531	0.0114942	0.831409	0.811269	0.0201397	0.868128	0.868962	-0.000833384	0.86737	0.87649	-0.0091202
cg02764898	0.683636	0.702878	-0.0192419	0.533576	0.554768	-0.0211913	0.673485	0.741946	-0.0684604	0.53287	0.496666	0.0362042
cg02769235	0.368983	0.339008	0.0299754	0.348022	0.331175	0.0168468	0.368454	0.36077	0.0076846	0.301937	0.269437	0.0325
cg02770249	0.519615	0.554579	-0.0349635	0.528984	0.586108	-0.0571238	0.749326	0.745866	0.00345963	0.528694	0.547551	-0.0188566
cg02770794	0.472175	0.472059	0.000115693	0.135027	0.132796	0.00223038	0.668826	0.681488	-0.0126619	0.531587	0.551786	-0.0201991
cg02772823	0.0498536	0.0462775	0.00357617	0.0702554	0.0612728	0.00898257	0.130437	0.121709	0.0087277	0.0503411	0.0615792	-0.0112381
cg02773688	0.773171	0.754144	0.0190265	0.709256	0.7443	-0.0350445	0.597863	0.557509	0.0403532	0.729998	0.76435	-0.0343511
cg02775256	0.452867	0.424197	0.0286701	0.237515	0.223473	0.0140422	0.414694	0.397714	0.0169805	0.407175	0.421232	-0.0140576
cg02779592	0.0423715	0.0449758	-0.00260432	0.0924382	0.113891	-0.0214531	0.0700324	0.0724275	-0.00239509	0.0614513	0.0391316	0.0223197
cg02779729	0.327483	0.32644	0.00104283	0.0498399	0.0464537	0.00338624	0.384567	0.374194	0.0103733	0.440425	0.423259	0.017166
cg02784144	0.580545	0.585127	-0.0045815	0.474529	0.464893	0.00963674	0.652274	0.682509	-0.030235	0.0635597	0.0835062	-0.0199465
cg02804166	0.318684	0.273161	0.0455237	0.319547	0.359362	-0.0398144	0.514768	0.515135	-0.000367032	0.243484	0.244269	-0.000784084
cg02804708	0.88708	0.888469	-0.00138819	0.911266	0.804655	0.106612	0.519094	0.505237	0.0138567	0.86369	0.867575	-0.00388515
cg02804757	0.551444	0.534491	0.0169539	0.255687	0.262995	-0.00730798	0.610438	0.600777	0.00966096	0.447868	0.40779	0.040078
cg02805922	0.462596	0.434085	0.0285109	0.217416	0.228694	-0.0112784	0.315055	0.317909	-0.00285446	0.150255	0.165527	-0.0152719
cg02809570	0.425795	0.462659	-0.0368642	0.454632	0.485201	-0.0305688	0.250758	0.101803	0.148955	0.082455	0.106651	-0.0241959
cg02811156	0.680597	0.684461	-0.00386434	0.74011	0.770429	-0.0303181	0.81818	0.83989	-0.0217097	0.65911	0.626368	0.0327421
cg02812399	0.0860528	0.0810706	0.00498215	0.145503	0.140987	0.00451567	0.22103	0.240914	-0.0198843	0.226238	0.23351	-0.00727285
cg02814558	0.103667	0.101514	0.00215299	0.157121	0.152514	0.00460772	0.186536	0.194289	-0.00775301	0.345113	0.309268	0.0358442
cg02817683	0.133279	0.153305	-0.0200262	0.737333	0.730758	0.00657545	0.401159	0.397559	0.00359987	0.450559	0.42187	0.028689
cg02818322	0.123495	0.111447	0.0120482	0.040478	0.0427361	-0.00225813	0.0439099	0.0441041	-0.000194248	0.0381279	0.0364062	0.00172172
cg02830187	0.191042	0.167051	0.0239908	0.150681	0.160097	-0.00941603	0.212018	0.195748	0.01627	0.0909456	0.103543	-0.0125973
cg02830744	0.41831	0.399138	0.0191723	0.465964	0.444947	0.0210169	0.386217	0.365527	0.0206906	0.664347	0.707087	-0.0427399
cg02831668	0.13337	0.156935	-0.0235647	0.124961	0.10738	0.0175808	0.0584906	0.0443307	0.0141599	0.186078	0.214246	-0.028168
cg02834125	0.762386	0.763008	-0.00062201	0.81068	0.845728	-0.0350486	0.850094	0.86584	-0.0157456	0.753879	0.732702	0.021177
cg02835735	0.609508	0.610656	-0.00114858	0.563477	0.499183	0.0642948	0.161008	0.147279	0.0137298	0.523454	0.479636	0.0438176
cg02836821	0.129	0.130743	-0.00174297	0.165226	0.168074	-0.002848	0.0380359	0.0285124	0.00952357	0.0309983	0.0290307	0.00196762
cg02839824	0.226256	0.200311	0.0259458	0.374632	0.383122	-0.00849073	0.257359	0.274805	-0.0174469	0.14969	0.15539	-0.00570004
cg02855049	0.553185	0.582289	-0.0291042	0.524533	0.530389	-0.00585629	0.798837	0.816602	-0.0177649	0.86169	0.837042	0.0246484
cg02856792	0.432653	0.430796	0.00185655	0.314004	0.33322	-0.019217	0.620494	0.629309	-0.008815	0.479899	0.542617	-0.0627183
cg02858817	0.0236576	0.0278042	-0.00414666	0.0196332	0.0331258	-0.0134926	0.120251	0.050482	0.0697689	0.0431571	0.0327097	0.0104474
cg02860323	0.740799	0.745913	-0.00511433	0.841761	0.858246	-0.0164849	0.868282	0.875749	-0.00746689	0.866267	0.859888	0.00637913
cg02868201	0.783157	0.788038	-0.00488181	0.619078	0.55298	0.0660981	0.825515	0.792168	0.0333467	0.789373	0.807339	-0.017966
cg02875834	0.405319	0.364109	0.0412097	0.41439	0.39375	0.02064	0.314716	0.327926	-0.0132096	0.421879	0.448195	-0.0263153
cg02877744	0.776071	0.763358	0.0127134	0.893727	0.922293	-0.0285655	0.876485	0.868479	0.00800574	0.742901	0.768873	-0.025972
cg02878966	0.708692	0.704937	0.00375483	0.700237	0.713308	-0.0130711	0.454632	0.460442	-0.00580947	0.685307	0.673859	0.0114489
cg02879223	0.117231	0.136063	-0.0188323	0.276337	0.255604	0.0207324	0.631976	0.68033	-0.0483538	0.199269	0.214561	-0.0152922
cg02879659	0.270607	0.288307	-0.0177004	0.0768654	0.0504877	0.0263777	0.362182	0.356175	0.00600658	0.132521	0.117551	0.01497
cg02881531	0.552818	0.556204	-0.00338594	0.428794	0.415032	0.013762	0.432608	0.446392	-0.0137838	0.576443	0.594503	-0.0180598
cg02882301	0.585711	0.541358	0.0443529	0.607305	0.59721	0.0100951	0.736497	0.730433	0.00606388	0.547514	0.555507	-0.00799306
cg02883100	0.441254	0.485394	-0.0441402	0.47195	0.511595	-0.0396444	0.81068	0.820331	-0.00965119	0.476747	0.534891	-0.0581433
cg02890529	0.704285	0.681003	0.0232828	0.839597	0.818283	0.0213134	0.871184	0.884526	-0.0133415	0.83437	0.80707	0.0273002
cg02892589	0.0658448	0.0729242	-0.00707936	0.140355	0.124847	0.0155077	0.175769	0.189152	-0.0133825	0.0843686	0.0859752	-0.0016066
cg02893780	0.415555	0.393058	0.0224968	0.23115	0.241752	-0.0106024	0.427151	0.434799	-0.00764825	0.135753	0.129244	0.00650909
cg02896496	0.33393	0.312683	0.0212469	0.30233	0.309425	-0.00709541	0.242659	0.24898	-0.00632096	0.200324	0.195231	0.00509297
cg02904064	0.559165	0.5732	-0.0140349	0.606912	0.569798	0.037113	0.503496	0.497472	0.00602406	0.652786	0.629346	0.0234395
cg02904184	0.309285	0.292662	0.0166221	0.171621	0.16963	0.00199135	0.20505	0.169703	0.0353473	0.453815	0.485038	-0.0312234
cg02907689	0.536569	0.517994	0.0185751	0.878221	0.8979	-0.0196786	0.964053	0.96513	-0.00107658	0.96513	0.954029	0.011101
cg02910451	0.0382257	0.0413969	-0.00317127	0.067832	0.0529609	0.0148711	0.086085	0.0711842	0.0149008	0.0736043	0.0662853	0.00731909
cg02912158	0.444902	0.431492	0.0134099	0.480365	0.473413	0.00695202	0.391733	0.382136	0.00959716	0.527177	0.532807	-0.00563029
cg02914047	0.814502	0.818459	-0.00395644	0.632454	0.575884	0.0565699	0.527128	0.50417	0.0229578	0.854848	0.841124	0.0137241
cg02915422	0.335939	0.342468	-0.00652909	0.37697	0.377117	-0.000146639	0.521146	0.531725	-0.0105793	0.359411	0.381016	-0.0216042
cg02921294	0.221628	0.215741	0.00588687	0.134798	0.152285	-0.0174865	0.223742	0.220136	0.00360542	0.335599	0.31848	0.0171191
cg02923300	0.380958	0.337595	0.0433622	0.699555	0.720235	-0.0206805	0.364786	0.363196	0.0015902	0.395158	0.354688	0.0404694
cg02924298	0.463019	0.480193	-0.017174	0.349312	0.360924	-0.0116115	0.567073	0.554744	0.0123288	0.116725	0.109187	0.0075381
cg02931149	0.841113	0.813231	0.0278822	0.779524	0.761824	0.0177002	0.534532	0.547514	-0.0129815	0.588349	0.596234	-0.00788505
cg02931660	0.788326	0.847745	-0.0594189	0.562847	0.517934	0.0449128	0.47154	0.468474	0.003066	0.553564	0.539814	0.0137503
cg02932763	0.715521	0.661928	0.0535928	0.760025	0.741568	0.0184569	0.511274	0.493931	0.0173434	0.616143	0.575519	0.0406246
cg02934281	0.276003	0.29078	-0.0147769	0.316848	0.328215	-0.0113667	0.512024	0.52993	-0.0179065	0.249934	0.304652	-0.0547178
cg02937293	0.37686	0.359319	0.0175412	0.465711	0.511982	-0.0462711	0.558525	0.595203	-0.0366781	0.0784217	0.0850928	-0.00667109
cg02939216	0.625391	0.602166	0.0232248	0.1636	0.125241	0.0383588	0.51958	0.530034	-0.0104541	0.609088	0.603344	0.00574391
cg02940028	0.156402	0.150858	0.0055442	0.444785	0.46283	-0.0180449	0.548637	0.554047	-0.0054107	0.34395	0.317597	0.0263525
cg02940221	0.0461769	0.0515624	-0.00538548	0.123507	0.10238	0.0211271	0.138055	0.110372	0.0276829	0.0854672	0.0689909	0.0164762
cg02944422	0.564881	0.581513	-0.016632	0.249613	0.256238	-0.0066245	0.707667	0.674039	0.0336284	0.524086	0.554869	-0.0307832
cg02949713	0.528322	0.569087	-0.0407644	0.757324	0.750374	0.00694952	0.491243	0.44812	0.0431232	0.80471	0.743488	0.0612219
cg02952729	0.464838	0.432775	0.0320631	0.185346	0.214365	-0.0290186	0.701634	0.690232	0.0114018	0.43381	0.409579	0.0242308
cg02953041	0.724156	0.711232	0.0129238	0.794136	0.801685	-0.00754943	0.809287	0.795066	0.0142206	0.786478	0.818509	-0.0320315
cg02969243	0.238	0.233951	0.00404926	0.254919	0.256611	-0.00169195	0.312638	0.319086	-0.00644791	0.398273	0.350669	0.047604
cg02971064	0.883555	0.866793	0.0167617	0.809447	0.773706	0.0357407	0.851275	0.863983	-0.0127084	0.812842	0.773176	0.0396661
cg02973734	0.902235	0.897017	0.00521769	0.879197	0.891719	-0.012522	0.909572	0.917183	-0.00761074	0.922151	0.916335	0.00581585
cg02973971	0.440877	0.444657	-0.00378086	0.406393	0.419566	-0.0131726	0.554348	0.55016	0.00418792	0.429931	0.439412	-0.00948024
cg02975846	0.421999	0.396606	0.0253929	0.104301	0.112323	-0.00802201	0.578617	0.576574	0.00204251	0.340644	0.339867	0.000776979
cg02977829	0.811296	0.77757	0.0337255	0.770088	0.769879	0.000208601	0.869699	0.858964	0.0107356	0.829561	0.840866	-0.0113048
cg02989381	0.272317	0.238547	0.0337701	0.38528	0.391709	-0.00642856	0.0611432	0.0614513	-0.000308114	0.700014	0.720086	-0.0200728
cg02991082	0.0364601	0.0443694	-0.00790929	0.055017	0.0447483	0.0102687	0.0549336	0.0606417	-0.0057081	0.0387829	0.0454238	-0.00664085
cg02992767	0.876973	0.837446	0.0395269	0.807876	0.813425	-0.00554868	0.658812	0.667684	-0.00887208	0.711418	0.678216	0.0332023
cg02992777	0.135572	0.118524	0.0170477	0.093069	0.055301	0.0377679	0.0838273	0.0747199	0.00910743	0.3548	0.312872	0.041928
cg02994237	0.0380497	0.0424861	-0.0044364	0.0430184	0.0455917	-0.00257327	0.0681716	0.0670064	0.00116518	0.0528298	0.0480549	0.00477487
cg02998933	0.321881	0.33977	-0.0178894	0.414694	0.38088	0.0338146	0.48883	0.508029	-0.0191999	0.352805	0.371608	-0.0188031
cg02999370	0.848151	0.847612	0.00053923	0.864463	0.840604	0.0238594	0.914976	0.907812	0.00716387	0.721617	0.643768	0.0778495
cg03003036	0.588569	0.599268	-0.0106991	0.561925	0.528705	0.0332201	0.494849	0.488624	0.00622508	0.710059	0.689393	0.020666
cg03003060	0.531831	0.507966	0.023865	0.206135	0.205925	0.000210071	0.273357	0.280844	-0.00748724	0.128517	0.122653	0.00586437
cg03005718	0.620468	0.626279	-0.00581011	0.612839	0.57111	0.0417287	0.45157	0.449974	0.0015962	0.663871	0.629261	0.0346107
cg03008405	0.0471593	0.0506328	-0.0034735	0.0464163	0.0556265	-0.00921021	0.0986817	0.127674	-0.028992	0.05169	0.0482355	0.00345456
cg03010388	0.291989	0.339278	-0.0472895	0.295224	0.2802	0.0150241	0.751864	0.727128	0.0247365	0.241195	0.279366	-0.0381703
cg03019842	0.0257842	0.0277543	-0.00197002	0.0379423	0.0277497	0.0101926	0.0282487	0.0308706	-0.00262197	0.0298372	0.0236864	0.00615087
cg03020597	0.163965	0.148423	0.0155413	0.153942	0.146583	0.00735827	0.0720834	0.0942922	-0.0222087	0.114642	0.1146	4.18101e-05
cg03021892	0.480434	0.456368	0.0240655	0.6482	0.593765	0.054435	0.198109	0.205843	-0.00773404	0.55012	0.499508	0.0506122
cg03022736	0.879749	0.86642	0.0133288	0.681703	0.647513	0.0341905	0.839078	0.841744	-0.00266658	0.739587	0.76594	-0.0263529
cg03022791	0.657913	0.626	0.0319134	0.822274	0.820275	0.00199906	0.799881	0.807855	-0.00797402	0.436045	0.425988	0.010057
cg03025340	0.393922	0.409131	-0.0152081	0.549959	0.528223	0.021736	0.404165	0.413124	-0.00895921	0.372243	0.35502	0.0172229
cg03025760	0.873613	0.866793	0.00682018	0.260629	0.241531	0.0190982	0.853097	0.860445	-0.00734856	0.835693	0.868942	-0.0332488
cg03026311	0.424497	0.458228	-0.0337309	0.153392	0.140309	0.013083	0.682335	0.707582	-0.0252469	0.453682	0.370663	0.0830195
cg03027462	0.63429	0.686434	-0.052144	0.805726	0.784947	0.0207789	0.729179	0.736569	-0.00739018	0.638602	0.635972	0.00263031
cg03028216	0.380793	0.398542	-0.0177487	0.428077	0.421315	0.00676245	0.159329	0.15345	0.00587845	0.692456	0.661848	0.0306083
cg03028851	0.651866	0.630615	0.0212511	0.684087	0.692825	-0.00873833	0.619007	0.608469	0.0105385	0.53113	0.52118	0.00995018
cg03031520	0.465554	0.456251	0.00930316	0.387662	0.378631	0.00903058	0.0576374	0.0657821	-0.00814467	0.341793	0.310473	0.0313201
cg03040210	0.298693	0.287927	0.0107659	0.294555	0.312585	-0.0180297	0.519004	0.523371	-0.00436651	0.231018	0.255886	-0.0248671
cg03043267	0.0415263	0.0195008	0.0220255	0.0321329	0.0278126	0.00432028	0.0340924	0.0411657	-0.00707324	0.0280234	0.0440901	-0.0160667
cg03043911	0.522772	0.566322	-0.0435495	0.508667	0.488548	0.020119	0.597237	0.554358	0.0428785	0.242806	0.215148	0.0276586
cg03044250	0.322795	0.355092	-0.0322972	0.515653	0.418721	0.0969329	0.381969	0.395281	-0.0133129	0.41915	0.388228	0.0309218
cg03046946	0.0871778	0.0882718	-0.00109403	0.34569	0.358563	-0.0128726	0.50902	0.488988	0.0200323	0.263902	0.251385	0.0125167
cg03050491	0.536445	0.584369	-0.0479244	0.51802	0.526341	-0.00832152	0.685046	0.622437	0.0626093	0.541869	0.531597	0.0102721
cg03055372	0.305804	0.182744	0.123061	0.3686	0.358864	0.0097359	0.0760443	0.1576	-0.0815557	0.294585	0.242172	0.0524134
cg03057808	0.436901	0.432364	0.00453713	0.406495	0.43081	-0.0243146	0.554275	0.565688	-0.0114122	0.416605	0.41634	0.000265012
cg03058616	0.421338	0.411982	0.00935564	0.735726	0.743624	-0.00789802	0.756068	0.786143	-0.0300754	0.652954	0.636601	0.0163531
cg03060488	0.506933	0.497484	0.0094487	0.549203	0.563755	-0.0145524	0.723925	0.748816	-0.0248911	0.291877	0.333533	-0.0416558
cg03073000	0.580906	0.553738	0.027168	0.0590299	0.0660878	-0.00705794	0.122693	0.140962	-0.0182689	0.0959766	0.0856408	0.0103358
cg03088756	0.597807	0.5688	0.0290068	0.757873	0.77975	-0.0218766	0.756224	0.768339	-0.0121156	0.519833	0.511192	0.00864111
cg03090449	0.911216	0.914098	-0.00288254	0.889682	0.87712	0.0125614	0.919888	0.918123	0.00176563	0.901517	0.885258	0.0162591
cg03094405	0.149745	0.162569	-0.0128237	0.209057	0.19531	0.0137476	0.132872	0.110535	0.0223374	0.163858	0.184462	-0.0206044
cg03096488	0.305133	0.320356	-0.0152225	0.352988	0.337821	0.0151669	0.33617	0.330414	0.00575566	0.239569	0.279678	-0.0401099
cg03100992	0.865367	0.856169	0.00919735	0.829062	0.851071	-0.0220092	0.590918	0.595936	-0.00501756	0.601785	0.60684	-0.00505491
cg03101044	0.916556	0.909151	0.0074042	0.912473	0.895591	0.0168816	0.844833	0.841537	0.00329566	0.893597	0.891302	0.00229516
cg03102848	0.0302252	0.0335315	-0.00330627	0.0368153	0.0394406	-0.00262522	0.0478134	0.0452357	0.0025777	0.0391895	0.0322078	0.00698176
cg03121419	0.0969928	0.0809773	0.0160156	0.0313488	0.0330597	-0.00171089	0.0501814	0.0282473	0.0219341	0.197996	0.205741	-0.0077455
cg03122476	0.841557	0.814516	0.0270414	0.681544	0.678627	0.00291696	0.94442	0.934846	0.00957407	0.878501	0.865535	0.0129657
cg03128268	0.567797	0.574615	-0.00681806	0.179522	0.200766	-0.021244	0.468618	0.479437	-0.0108184	0.151171	0.177171	-0.0260006
cg03130686	0.445543	0.436114	0.00942899	0.675762	0.681581	-0.00581873	0.474608	0.484027	-0.00941973	0.490537	0.475699	0.0148376
cg03139204	0.765652	0.736256	0.0293962	0.380614	0.374599	0.00601416	0.674225	0.780115	-0.10589	0.62004	0.605569	0.0144706
cg03140487	0.444106	0.445633	-0.00152761	0.487337	0.492226	-0.0048893	0.456429	0.479231	-0.0228028	0.452748	0.427133	0.0256151
cg03147775	0.379776	0.401203	-0.021427	0.394228	0.390535	0.00369348	0.330133	0.328444	0.00168947	0.407707	0.411295	-0.00358875
cg03149049	0.0254935	0.0278127	-0.00231924	0.0385911	0.0312264	0.00736472	0.0286706	0.0224674	0.00620315	0.0226161	0.0281958	-0.00557972
cg03157806	0.566263	0.580593	-0.0143302	0.551603	0.601981	-0.0503784	0.765029	0.754085	0.0109441	0.572366	0.544053	0.0283129
cg03159767	0.771991	0.796549	-0.0245582	0.845966	0.841733	0.00423264	0.779724	0.757648	0.0220763	0.615997	0.540613	0.0753843
cg03159836	0.0277658	0.0254883	0.00227754	0.0332993	0.0326288	0.000670498	0.0364079	0.0306295	0.00577833	0.0232495	0.0272836	-0.00403409
cg03161453	0.508703	0.497225	0.0114787	0.46883	0.449033	0.0197964	0.480851	0.483148	-0.00229683	0.703238	0.710784	-0.00754551
cg03164831	0.11678	0.120602	-0.0038229	0.430364	0.449102	-0.0187384	0.243229	0.242537	0.000692443	0.433506	0.451443	-0.0179373
cg03165260	0.692725	0.688432	0.00429296	0.0859863	0.0777179	0.00826836	0.541949	0.527138	0.0148101	0.645303	0.607447	0.0378568
cg03166428	0.835593	0.823281	0.0123119	0.522256	0.520515	0.00174169	0.885327	0.864427	0.0209005	0.836631	0.855395	-0.0187642
cg03169432	0.0438506	0.0416275	0.00222306	0.0431217	0.0458738	-0.00275216	0.0469858	0.0431571	0.00382864	0.0468891	0.0373469	0.0095421
cg03174501	0.877756	0.889841	-0.0120849	0.871184	0.861848	0.00933633	0.885615	0.883909	0.00170611	0.837387	0.850979	-0.0135916
cg03176466	0.479148	0.453277	0.0258715	0.858234	0.852741	0.005493	0.648553	0.625842	0.0227109	0.430436	0.503453	-0.0730163
cg03181214	0.0953001	0.0946313	0.000668816	0.359568	0.356328	0.00323913	0.435102	0.454719	-0.0196177	0.344501	0.312739	0.0317614
cg03183094	0.861919	0.863454	-0.00153533	0.705147	0.696855	0.00829159	0.870629	0.865318	0.00531082	0.818655	0.818806	-0.000150583
cg03183106	0.947039	0.930241	0.0167981	0.940494	0.915665	0.0248281	0.90875	0.895402	0.0133482	0.914214	0.919344	-0.00513072
cg03184366	0.652326	0.623444	0.0288819	0.589819	0.590734	-0.000914603	0.797813	0.802	-0.00418667	0.769778	0.746046	0.0237322
cg03191149	0.0395191	0.0357297	0.00378938	0.0579929	0.0528356	0.00515735	0.0501083	0.0611196	-0.0110113	0.0462037	0.0374148	0.0087889
cg03191359	0.469441	NA	NA	0.53122	0.479437	0.0517834	0.333414	0.349316	-0.015902	0.511284	0.542731	-0.0314472
cg03198117	0.595435	0.587347	0.00808844	0.39544	0.398426	-0.00298581	0.463814	0.470457	-0.00664382	0.559103	0.588373	-0.0292709
cg03201165	0.121593	0.124828	-0.00323514	0.30434	0.300159	0.00418151	0.36465	0.38776	-0.0231107	0.197705	0.18894	0.00876535
cg03201658	0.756975	0.759839	-0.00286416	0.863645	0.867831	-0.00418579	0.267654	0.23493	0.0327237	0.590225	0.563603	0.0266218
cg03204600	0.0502571	0.0513124	-0.00105532	0.0781921	0.0805214	-0.0023293	0.0846808	0.124915	-0.0402344	0.0510404	0.0533999	-0.00235948
cg03210191	0.684233	0.721232	-0.0369986	0.472145	0.431166	0.0409791	0.182217	0.138428	0.0437891	0.47533	0.377573	0.0977569
cg03212133	0.109349	0.10804	0.00130951	0.388145	0.43588	-0.0477347	0.472019	0.476246	-0.00422772	0.0588071	0.0455387	0.0132684
cg03213502	0.452435	0.462826	-0.0103915	0.466547	0.47688	-0.0103325	0.435622	0.442187	-0.00656545	0.57367	0.600111	-0.026441
cg03221436	0.549068	0.494032	0.0550361	0.11246	0.108735	0.00372561	0.460813	0.465245	-0.00443184	0.0790433	0.0852867	-0.00624341
cg03223687	0.84519	0.834529	0.010661	0.828746	0.821468	0.00727847	0.841823	0.832316	0.00950675	0.670935	0.692825	-0.0218899
cg03236853	0.775371	0.76037	0.0150012	0.755888	0.757579	-0.00169104	0.807736	0.82014	-0.0124039	0.658495	0.650924	0.00757177
cg03240752	0.569254	0.534994	0.0342596	0.447317	0.444823	0.00249339	0.310135	0.323884	-0.0137491	0.766579	0.773966	-0.00738723
cg03244432	0.459305	0.452604	0.00670148	0.433293	0.444142	-0.0108491	0.561704	0.566589	-0.00488499	0.407381	0.419126	-0.0117448
cg03248529	0.640341	0.636691	0.00365037	0.470017	0.469595	0.000421969	0.382894	0.377835	0.00505913	0.55156	0.497745	0.0538147
cg03250346	0.582275	0.562508	0.019767	0.593442	0.600713	-0.00727153	0.713634	0.659344	0.05429	0.539936	0.569613	-0.0296766
cg03252296	0.0955837	0.0944574	0.00112629	0.228115	0.212118	0.0159974	0.0385911	0.0762016	-0.0376105	0.323533	0.286639	0.0368932
cg03258315	0.934477	0.918663	0.0158139	0.563364	0.529658	0.0337058	0.636078	0.626438	0.00963958	0.552399	0.518727	0.0336726
cg03267527	0.110959	0.109552	0.00140727	0.0917176	0.110395	-0.0186779	0.169818	0.157894	0.0119248	0.195872	0.196271	-0.000399341
cg03267787	0.78206	0.756037	0.0260235	0.744432	0.722003	0.0224289	0.765919	0.766744	-0.00082451	0.725082	0.729639	-0.00455745
cg03273606	0.359081	0.398989	-0.0399084	0.237674	0.261157	-0.0234834	0.443103	0.456023	-0.0129197	0.334225	0.388095	-0.0538697
cg03273615	0.174601	0.160935	0.0136656	0.0626446	0.0579711	0.00467352	0.0548096	0.0445926	0.010217	0.551114	0.574369	-0.0232557
cg03273860	0.337385	0.41935	-0.0819645	0.505963	0.537475	-0.0315125	0.428671	0.4202	0.0084711	0.525786	0.503363	0.0224227
cg03274069	0.532264	0.5628	-0.0305364	0.56763	0.531276	0.0363544	0.266474	0.264072	0.00240192	0.532546	0.50168	0.030866
cg03278754	0.203798	0.198558	0.0052403	0.236333	0.239953	-0.00362049	0.0471453	0.0322688	0.0148765	0.0454922	0.0430164	0.00247575
cg03280420	0.39412	0.42341	-0.0292906	0.435491	0.440724	-0.00523283	0.523476	0.540061	-0.0165843	0.323127	0.397176	-0.074049
cg03289972	0.667012	0.59987	0.0671418	0.685046	0.635376	0.0496695	0.483113	0.47688	0.00623376	0.341057	0.336972	0.00408443
cg03291819	0.280789	0.286103	-0.00531368	0.447769	0.399026	0.0487422	0.406495	0.42846	-0.0219647	0.436382	0.439251	-0.0028687
cg03305185	0.425975	0.451518	-0.0255423	0.440033	0.45671	-0.016677	0.550093	0.549287	0.0008063	0.127674	0.122899	0.00477461
cg03313909	0.9052	0.907496	-0.00229663	0.707283	0.716417	-0.00913402	0.877187	0.851009	0.0261786	0.925692	0.907506	0.0181866
cg03315531	0.609628	0.597196	0.0124317	0.713971	0.708298	0.00567294	0.815866	0.812399	0.00346718	0.501734	0.49657	0.00516434
cg03319489	0.501669	0.50204	-0.000371017	0.513633	0.543216	-0.0295822	0.646669	0.639008	0.00766103	0.479968	0.497558	-0.0175898
cg03321558	0.439601	0.412895	0.0267057	0.435102	0.43629	-0.00118835	0.147648	0.110535	0.037113	0.0838469	0.0904067	-0.00655984
cg03323167	0.882208	0.907034	-0.024826	0.642143	0.633449	0.00869479	0.551603	0.512864	0.0387389	0.883621	0.853106	0.0305142
cg03325532	0.850684	0.814633	0.0360505	0.852299	0.858594	-0.00629463	0.843734	0.829461	0.0142737	0.818446	0.813737	0.00470845
cg03327000	0.127503	0.120314	0.00718858	0.52738	0.553711	-0.0263311	0.250376	0.208903	0.0414727	0.100653	0.0910975	0.00955502
cg03328165	0.442746	0.439238	0.00350739	0.401159	0.410975	-0.00981614	0.545451	0.547721	-0.0022694	0.118103	0.121071	-0.00296768
cg03329583	0.653961	0.605495	0.048466	0.530647	0.483286	0.0473612	0.42174	0.428763	-0.00702301	0.643883	0.656765	-0.0128825
cg03331695	0.810048	0.802538	0.00750941	0.588685	0.568446	0.0202395	0.472611	0.467649	0.00496194	0.803037	0.820548	-0.017511
cg03332892	0.191322	0.193909	-0.00258777	0.0958232	0.0936903	0.00213289	0.139101	0.119043	0.0200583	0.515484	0.489314	0.02617
cg03334316	0.649122	0.672487	-0.023365	0.680176	0.693696	-0.0135194	0.749875	0.783802	-0.033927	0.634502	0.645532	-0.0110291
cg03345068	0.136179	0.132273	0.00390564	0.619007	0.616376	0.0026313	0.0430768	0.0908015	-0.0477247	0.257961	0.300796	-0.0428344
cg03350825	0.0469764	0.0543953	-0.00741883	0.0960727	0.0954372	0.00063548	0.0683943	0.0917308	-0.0233366	0.0681516	0.054435	0.0137166
cg03350932	0.800775	0.837327	-0.0365525	0.561276	0.512776	0.0485003	0.537992	0.552875	-0.0148838	0.450318	0.452233	-0.0019146
cg03351894	0.737924	0.724015	0.0139091	0.704815	0.689393	0.0154219	0.803355	0.818214	-0.014859	0.655996	0.674931	-0.0189347
cg03353482	0.510279	0.505994	0.00428528	0.442498	0.40229	0.0402083	0.387572	0.391505	-0.00393329	0.472427	0.455016	0.0174112
cg03357510	0.350151	0.358959	-0.00880856	0.472019	0.430523	0.0414958	0.126322	0.117182	0.00913947	0.276601	0.261669	0.0149323
cg03359503	0.0559904	0.0567547	-0.00076431	0.504901	0.47378	0.0311212	0.0357226	0.0912553	-0.0555327	0.094432	0.108003	-0.0135715
cg03361581	0.199096	0.214642	-0.015546	0.473091	0.453125	0.0199667	0.0342054	0.026566	0.00763939	0.374432	0.249061	0.125371
cg03369029	0.100557	0.0919966	0.00856039	0.294792	0.274431	0.020362	0.0921703	0.125405	-0.0332344	0.12129	0.1548	-0.0335106
cg03369828	0.603516	0.609986	-0.00647001	0.662781	0.640113	0.0226687	0.441193	0.423723	0.0174698	0.573779	0.587746	-0.0139668
cg03372815	0.613105	0.60857	0.00453535	0.648692	0.659193	-0.0105011	0.805524	0.808237	-0.00271247	0.613271	0.627323	-0.014052
cg03375088	0.624013	0.557907	0.0661064	0.598562	0.555122	0.04344	0.492436	0.497135	-0.00469924	0.604458	0.54904	0.0554174
cg03382925	0.0814451	0.0775812	0.00386395	0.170341	0.171586	-0.00124506	0.672553	0.649162	0.0233917	0.523807	0.509409	0.0143974
cg03422380	0.447749	0.492501	-0.044752	0.267144	0.273312	-0.00616808	0.385123	0.369693	0.0154306	0.310771	0.319208	-0.00843673
cg03423123	0.521858	0.56228	-0.0404222	0.232447	0.228272	0.00417477	0.676333	0.648738	0.0275941	0.50417	0.517651	-0.0134801
cg03424637	0.555341	0.544575	0.0107654	0.233578	0.229009	0.00456954	0.670864	0.647445	0.0234188	0.49044	0.499508	-0.00906842
cg03424927	0.403243	0.386818	0.0164247	0.355587	0.318941	0.0366455	0.0520215	0.0435481	0.0084734	0.590547	0.608751	-0.0182034
cg03426344	0.798549	0.79242	0.00612842	0.861646	0.886498	-0.0248514	0.504901	0.508379	-0.00347775	0.855902	0.864184	-0.00828163
cg03435878	0.503321	0.553297	-0.049975	0.458588	0.459712	-0.00112405	0.571169	0.559929	0.0112405	0.600017	0.56276	0.0372569
cg03445679	0.735947	0.71483	0.0211169	0.475996	0.576463	-0.100467	NA	0.46999	NA	0.511706	0.502451	0.00925448
cg03447800	0.565444	0.582669	-0.017225	0.529148	0.524434	0.00471362	0.618775	0.640003	-0.0212287	0.520504	0.519612	0.000891972
cg03448884	0.621589	0.591356	0.0302328	0.572665	0.534	0.0386649	0.168912	0.20348	-0.0345679	0.726587	0.701654	0.0249327
cg03449040	0.870019	0.85658	0.0134392	0.85356	0.841164	0.0123966	0.863466	0.840461	0.0230053	0.851289	0.875035	-0.0237462
cg03450733	0.576443	0.601489	-0.0250467	0.622893	0.604113	0.0187798	0.922144	0.922298	-0.00015383	0.18645	0.184821	0.00162855
cg03455762	0.875532	0.86363	0.0119014	0.839078	0.798659	0.040419	0.56248	0.583734	-0.0212548	0.458958	0.524355	-0.0653968
cg03460558	0.746091	0.755392	-0.00930098	0.487276	0.521482	-0.0342067	0.591805	0.611553	-0.0197482	0.476597	0.482459	-0.00586273
cg03464416	0.37428	0.419978	-0.0456979	0.261717	0.285892	-0.0241748	0.28633	0.311382	-0.025052	0.464305	0.4745	-0.010195
cg03465562	0.896292	0.871993	0.024299	0.848985	0.786778	0.0622073	0.47226	0.458878	0.0133823	0.843773	0.843747	2.58587e-05
cg03469514	0.429624	0.47133	-0.0417052	0.326401	0.317215	0.00918674	0.46665	0.436382	0.0302677	0.348253	0.298323	0.0499297
cg03477368	0.675835	0.682233	-0.0063984	0.756394	0.735357	0.0210378	0.770771	0.745406	0.0253641	0.581247	0.58236	-0.00111313
cg03478540	0.0655804	0.0697192	-0.00413884	0.110871	0.132964	-0.0220933	0.166405	0.19532	-0.0289152	0.0970707	0.0869726	0.0100981
cg03484234	0.496956	0.503677	-0.00672083	0.934497	0.939754	-0.00525654	0.501938	0.496086	0.00585213	0.885338	0.908929	-0.023591
cg03508597	0.108995	0.112349	-0.00335344	0.0672487	0.0613938	0.00585496	0.0752405	0.0844993	-0.00925887	0.0580646	0.0590236	-0.000958983
cg03509565	0.233826	0.212048	0.0217781	0.337397	0.325415	0.0119819	0.28865	0.264718	0.0239324	0.20317	0.197781	0.00538894
cg03509908	0.302121	0.341659	-0.0395382	0.657399	0.668032	-0.0106327	0.434944	0.441035	-0.00609156	0.557689	0.583385	-0.025696
cg03512369	0.0988039	0.105375	-0.00657075	0.109541	0.101416	0.00812509	0.152296	0.116249	0.0360463	0.179465	0.212118	-0.0326531
cg03512439	0.724673	0.721692	0.0029809	0.578965	0.568775	0.0101898	0.508763	0.505449	0.00331438	0.683505	0.67233	0.0111743
cg03523199	0.4553	0.471442	-0.0161419	0.438358	0.429395	0.00896216	0.573777	0.59692	-0.0231429	0.421327	0.422459	-0.00113219
cg03523360	0.11736	0.10165	0.0157099	0.135575	0.123706	0.0118688	0.0503774	0.0673733	-0.0169959	0.36802	0.378442	-0.0104222
cg03523884	0.279187	0.28375	-0.00456351	0.250984	0.265357	-0.0143731	0.489316	0.492341	-0.00302493	0.267682	0.242338	0.0253445
cg03527511	0.165613	0.178583	-0.0129701	0.196878	0.192905	0.00397259	0.20676	0.237309	-0.0305485	0.160665	0.167611	-0.00694607
cg03534718	0.687022	0.716883	-0.0298612	0.774602	0.796588	-0.0219863	0.731594	0.743677	-0.0120825	0.799226	0.797958	0.00126824
cg03536032	0.364041	0.340379	0.023662	0.34875	0.349598	-0.00084803	0.547933	0.552048	-0.00411476	0.288662	0.325333	-0.0366711
cg03537243	0.28778	0.325194	-0.0374134	0.522566	0.543792	-0.0212255	0.614071	0.632242	-0.0181717	0.552282	0.550509	0.0017725
cg03537374	0.133556	0.14162	-0.00806402	0.160237	0.167611	-0.00737381	0.206469	0.196137	0.0103321	0.422205	0.367034	0.0551714
cg03552552	0.0908874	0.0859973	0.00489005	0.416167	0.412616	0.00355043	0.145045	0.14969	-0.00464481	0.0831858	0.0837632	-0.000577392
cg03554855	0.631701	0.631446	0.000254135	0.693471	0.685253	0.00821798	0.437626	0.469737	-0.0321104	0.587881	0.550328	0.0375533
cg03558222	0.151009	0.158691	-0.00768215	0.171935	0.182562	-0.0106275	0.263226	0.275237	-0.0120109	0.33106	0.307906	0.023154
cg03575468	0.212261	0.242269	-0.0300075	0.370117	0.395026	-0.0249089	0.274766	0.270616	0.00415026	0.150373	0.148097	0.00227586
cg03576039	0.563509	0.550637	0.0128722	0.524318	0.548666	-0.024348	0.639235	0.628699	0.0105358	0.498791	0.477492	0.0212985
cg03576235	0.169543	0.166133	0.00340986	0.239989	0.243174	-0.00318453	0.390113	0.395052	-0.00493949	0.155722	0.153091	0.00263089
cg03578806	0.850796	0.843964	0.00683168	0.679508	0.676044	0.00346434	0.511507	0.491014	0.0204925	0.821152	0.78123	0.0399226
cg03595428	0.478405	0.511545	-0.0331392	0.563675	0.543093	0.0205819	0.624265	0.690015	-0.0657502	0.508792	0.538854	-0.0300627
cg03598440	0.434021	0.458096	-0.0240757	0.302188	0.288083	0.0141049	0.368325	0.376109	-0.00778475	0.386698	0.360924	0.0257739
cg03598919	0.823515	0.827901	-0.00438636	0.886796	0.876332	0.0104632	0.854052	0.864855	-0.0108029	0.852897	0.830706	0.0221909
cg03598947	0.830039	0.845127	-0.0150883	0.875814	0.828464	0.0473501	0.786202	0.797741	-0.0115394	0.818214	0.834919	-0.0167048
cg03601619	0.893223	0.884018	0.0092056	0.859095	0.838396	0.0206985	0.832562	0.83758	-0.00501794	0.904747	0.891059	0.013688
cg03604216	0.686588	0.687652	-0.00106447	0.774942	0.778914	-0.00397238	0.434288	0.42412	0.0101683	0.15871	0.16323	-0.0045203
cg03604519	0.0677867	0.0558907	0.011896	0.066828	0.0930585	-0.0262305	0.134798	0.118599	0.0161987	0.0840304	0.0822435	0.00178692
cg03605858	0.421914	0.393611	0.0283031	0.589163	0.605898	-0.0167349	0.452663	0.451636	0.00102734	0.498182	0.501959	-0.00377692
cg03608855	0.576686	0.575567	0.00111878	0.700405	0.692383	0.00802273	0.590712	0.590667	4.46065e-05	0.636697	0.59014	0.0465574
cg03610137	0.200204	0.220126	-0.0199223	0.508456	0.527599	-0.0191435	0.369286	0.358331	0.0109554	0.464569	0.452462	0.0121068
cg03636437	0.668518	0.665935	0.00258282	0.745939	0.745959	-1.98884e-05	0.117131	0.0393696	0.0777613	0.719647	0.677586	0.0420603
cg03646906	0.748647	0.740075	0.00857198	0.627935	0.63275	-0.00481483	0.493983	0.493297	0.000685353	0.782786	0.787288	-0.00450176
cg03650842	0.50397	0.484508	0.0194622	0.495817	0.494444	0.00137238	0.453988	0.454014	-2.65457e-05	0.266948	0.249715	0.017233
cg03658985	0.450911	0.475275	-0.024364	0.458489	0.439565	0.0189239	0.549717	0.575492	-0.0257744	0.419788	0.353444	0.0663439
cg03659012	0.499692	0.559518	-0.0598261	0.537857	0.554199	-0.0163416	0.712526	0.711862	0.000664105	0.410386	0.431112	-0.0207259
cg03660541	0.608748	0.595542	0.0132063	0.646837	0.66989	-0.0230528	0.253307	0.229276	0.0240305	0.53729	0.514389	0.0229012
cg03660876	0.776565	0.775325	0.00123952	0.402671	0.397278	0.00539335	0.570307	0.571996	-0.00168942	0.558536	0.537475	0.0210608
cg03661529	0.478279	0.484347	-0.00606744	0.504451	0.547793	-0.0433413	0.639873	0.667194	-0.0273203	0.425731	0.454272	-0.0285409
cg03662899	0.113773	0.0999891	0.0137834	0.502387	0.502583	-0.000196119	0.426503	0.451764	-0.0252611	0.32612	0.333732	-0.0076112
cg03664928	0.115374	0.134494	-0.0191201	0.452838	0.436673	0.0161642	0.500622	0.482045	0.0185769	0.41273	0.436844	-0.0241133
cg03665601	0.0700916	0.0735235	-0.00343193	0.0515977	0.0640268	-0.0124291	0.413145	0.415353	-0.00220738	0.223236	0.218315	0.0049215
cg03669491	0.832451	0.816476	0.0159752	0.607166	0.540075	0.0670912	0.912302	0.873027	0.039275	0.863109	0.902268	-0.0391584
cg03670355	0.666217	0.648374	0.0178425	0.651367	0.664304	-0.0129372	0.799972	0.80018	-0.000208013	0.894302	0.876232	0.0180704
cg03672021	0.2662	0.243284	0.0229154	0.304853	0.328875	-0.0240221	0.186943	0.193734	-0.00679046	0.088702	0.102701	-0.0139989
cg03674851	0.888081	0.925046	-0.0369645	0.837454	0.853262	-0.0158083	0.906673	0.905264	0.00140883	0.619516	0.565493	0.0540227
cg03675615	0.0234542	0.0212577	0.00219649	0.0342631	0.0243296	0.00993344	0.0245597	0.0324436	-0.00788396	0.0236861	0.0257766	-0.00209051
cg03679005	0.0948357	0.0840236	0.0108122	0.308241	0.304976	0.0032647	0.120556	0.0862516	0.0343046	0.212242	0.280797	-0.0685552
cg03682444	0.173756	0.177877	-0.00412107	0.205462	0.206839	-0.00137691	0.267292	0.251595	0.0156972	0.235571	0.266505	-0.0309338
cg03688409	0.0721165	0.0742611	-0.00214465	0.207458	0.192196	0.0152619	0.524318	0.540349	-0.0160317	0.132874	0.123394	0.00948019
cg03689540	0.872956	0.869454	0.00350222	0.610237	0.583385	0.0268511	0.466358	0.490771	-0.0244126	0.853933	0.882351	-0.028418
cg03692134	0.417108	0.44719	-0.0300824	0.372104	0.389105	-0.0170016	0.571079	0.569151	0.00192799	0.400304	0.41994	-0.0196359
cg03692149	0.856507	0.877331	-0.0208242	0.740226	0.718516	0.0217095	0.859095	0.865435	-0.00634006	0.864855	0.86858	-0.00372534
cg03693842	0.478496	0.484212	-0.00571576	0.0480226	0.0407083	0.0073143	0.10388	0.0666362	0.0372434	0.610921	0.599428	0.0114937
cg03699508	0.0473228	0.0555331	-0.00821025	0.191012	0.19863	-0.00761853	0.0626446	0.0667116	-0.00406698	0.057182	0.0693528	-0.0121708
cg03704031	0.116297	0.140004	-0.0237071	0.26543	0.28141	-0.0159802	0.194894	0.182482	0.0124112	0.240914	0.235222	0.00569203
cg03704653	0.852928	0.841938	0.01099	0.802339	0.794003	0.0083367	0.635989	0.640221	-0.00423171	0.802213	0.848085	-0.0458718
cg03706022	0.444678	0.445023	-0.000345238	0.524598	0.562638	-0.0380403	0.755888	0.65398	0.101908	0.480577	0.538267	-0.0576899
cg03709474	0.908725	0.899882	0.00884295	0.906277	0.904457	0.00181974	0.578165	0.538144	0.0400206	0.921125	0.914786	0.00633886
cg03711046	0.402375	0.42382	-0.0214441	0.440719	0.428635	0.0120838	0.502892	0.487051	0.0158409	0.214807	0.22563	-0.0108232
cg03714991	0.381522	0.432021	-0.0504989	0.339153	0.340449	-0.00129647	0.167763	0.159023	0.00874045	0.634693	0.626007	0.00868595
cg03715506	0.599556	0.611824	-0.0122673	0.601801	0.596841	0.00495929	0.507857	0.507871	-1.406e-05	0.730298	0.71821	0.012088
cg03716231	0.880399	0.911915	-0.0315163	0.105411	0.132583	-0.0271712	0.617378	0.645769	-0.0283913	0.595085	0.612285	-0.0172
cg03717424	0.0491414	0.054274	-0.00513269	0.0858545	0.100206	-0.0143515	0.117047	0.103829	0.013218	0.168386	0.149719	0.0186678
cg03717635	0.785857	0.78235	0.00350714	0.862905	0.892742	-0.0298374	0.853727	0.862318	-0.00859103	0.538835	0.577205	-0.0383697
cg03718309	0.473185	0.459906	0.0132788	0.56456	0.631374	-0.0668145	0.782686	0.773611	0.00907515	0.610798	0.593948	0.01685
cg03728850	0.450168	0.447071	0.00309717	0.463224	0.491526	-0.0283017	0.094528	0.0770546	0.0174734	0.429472	0.459161	-0.0296893
cg03732411	0.283865	0.275037	0.00882844	0.435561	0.435533	2.75999e-05	0.549277	0.520634	0.0286426	0.0461652	0.0394667	0.00669849
cg03733831	0.193334	0.169311	0.0240228	0.143035	0.161375	-0.0183405	0.224429	0.22097	0.00345875	0.209637	0.220962	-0.011325
cg03735049	0.132909	0.142074	-0.00916474	0.362836	0.356888	0.00594835	0.121096	0.19487	-0.0737738	0.0424823	0.0556265	-0.0131442
cg03735077	0.711621	0.716087	-0.00446619	0.705319	0.712779	-0.00745992	0.831893	0.82985	0.00204291	0.701843	0.725332	-0.0234887
cg03738247	0.441813	0.465241	-0.0234277	0.432802	0.454191	-0.0213884	0.567256	0.578761	-0.0115048	0.3858	0.435596	-0.0497965
cg03744114	0.220325	0.209621	0.0107039	0.152221	0.135553	0.0166672	0.0563303	0.0942922	-0.0379619	0.296226	0.263323	0.0329025
cg03744357	0.0273035	0.0242189	0.00308467	0.0220805	0.0394406	-0.0173601	0.0284262	0.0390534	-0.0106272	0.0360483	0.0267274	0.00932085
cg03748429	0.610719	0.644888	-0.0341688	0.534124	0.482821	0.0513029	0.740529	0.729543	0.010986	0.557509	0.589677	-0.0321679
cg03753451	0.441144	0.42127	0.0198731	0.497718	0.525867	-0.0281488	0.625621	0.607517	0.0181037	0.495931	0.493756	0.00217556
cg03753611	0.481039	0.497277	-0.0162378	0.535932	0.554665	-0.0187338	0.586916	0.588226	-0.00131032	0.486567	0.5167	-0.0301327
cg03761894	0.118053	0.10652	0.0115328	0.472532	0.490327	-0.0177958	0.54358	0.530572	0.0130081	0.100438	0.0860763	0.0143616
cg03761923	0.445956	0.418311	0.0276446	0.0458308	0.0419764	0.00385435	0.0480572	0.0511265	-0.00306922	0.150492	0.142725	0.00776633
cg03762767	0.636242	0.617149	0.0190924	0.730616	0.727368	0.00324756	0.338402	0.323397	0.0150051	0.422786	0.391879	0.0309073
cg03765359	0.504543	0.526954	-0.0224106	0.554039	0.58085	-0.0268111	0.711174	0.668543	0.0426305	0.548647	0.553119	-0.00447242
cg03765898	0.460632	0.477686	-0.0170546	0.0266887	0.0309995	-0.0043108	0.418528	0.402434	0.0160943	0.607759	0.5723	0.0354593
cg03766586	0.436901	0.392621	0.0442803	0.0649462	0.0828039	-0.0178578	0.108378	0.0787017	0.029676	0.0406674	0.0533387	-0.0126712
cg03768687	0.435959	0.416248	0.0197108	0.394109	0.404625	-0.0105154	0.538821	0.564677	-0.0258565	0.318901	0.356724	-0.0378227
cg03769817	0.548528	0.552091	-0.00356244	0.513633	0.508802	0.00483171	0.406319	0.419379	-0.01306	0.524692	0.490221	0.0344711
cg03773146	0.594482	0.604501	-0.0100183	0.624633	0.627886	-0.00325285	0.754405	0.747584	0.0068212	0.58145	0.581393	5.70076e-05
cg03783575	0.419979	0.395629	0.0243499	0.688269	0.694083	-0.00581448	0.0627291	0.0567306	0.00599853	0.377094	0.408719	-0.031625
cg03787796	0.242507	0.293593	-0.0510867	0.173659	0.168688	0.00497148	0.13999	0.165928	-0.0259386	0.126179	0.126737	-0.000558065
cg03788610	0.250249	0.247223	0.00302603	0.381625	0.362275	0.0193495	0.0735906	0.120115	-0.0465249	0.479746	0.479311	0.000434881
cg03789606	0.0523823	0.0385278	0.0138545	0.0909635	0.0332213	0.0577422	0.0616641	0.0348379	0.0268263	0.0333371	0.0511313	-0.0177942
cg03790146	0.55013	0.545974	0.00415635	0.556075	0.529951	0.026124	0.431342	0.454873	-0.0235314	0.441822	0.42845	0.013372
cg03790891	0.0482014	0.0510133	-0.00281192	0.0532735	0.0787284	-0.0254549	0.0879963	0.090296	-0.00229973	0.0565607	0.0488159	0.0077448
cg03791434	0.815107	0.845871	-0.0307643	NA	0.816203	NA	0.521095	0.53113	-0.0100351	0.747793	0.740826	0.00696729
cg03791917	0.0548823	0.0559679	-0.00108564	0.113784	0.0789607	0.0348228	0.153783	0.138142	0.0156408	0.0812909	0.0727706	0.00852025
cg03793368	0.29062	0.289017	0.00160306	0.0382158	0.0428032	-0.00458735	0.0607297	0.0364871	0.0242426	0.345694	0.337633	0.00806059
cg03800724	0.0713658	0.069087	0.0022788	0.132068	0.124946	0.00712253	0.175899	0.170848	0.00505156	0.0663397	0.0752871	-0.00894736
cg03802931	0.186055	0.182259	0.00379593	0.268133	0.265219	0.00291393	0.371114	0.387461	-0.0163472	0.0718494	0.106013	-0.0341639
cg03805048	0.160251	0.177243	-0.0169926	0.441442	0.468517	-0.0270754	0.563058	0.572271	-0.00921312	0.123832	0.131723	-0.00789038
cg03806192	0.455597	0.491563	-0.0359664	0.678321	0.694573	-0.0162516	0.810335	0.811872	-0.00153761	0.8934	0.926796	-0.0333967
cg03810476	0.493223	0.415444	0.0777788	0.543683	0.554385	-0.0107019	0.244163	0.228142	0.0160219	0.479488	0.421805	0.0576833
cg03810479	0.573775	0.594762	-0.0209875	0.590794	0.58064	0.0101545	0.221925	0.209637	0.0122879	0.712657	0.70901	0.0036466
cg03817616	0.0342088	0.0410046	-0.00679586	0.0636011	0.0771333	-0.0135321	0.0590299	0.0504294	0.00860055	0.0357287	0.0382867	-0.00255801
cg03821767	0.689677	0.686133	0.00354458	0.545555	0.492918	0.0526373	0.671285	0.698387	-0.0271029	0.560139	0.562416	-0.00227714
cg03822658	0.657458	0.65618	0.00127799	0.778413	0.79739	-0.0189776	0.526706	0.567375	-0.0406689	0.7203	0.743488	-0.0231883
cg03823092	0.407994	0.408536	-0.000541899	0.43664	0.390846	0.0457944	0.249613	0.238653	0.0109602	0.436751	0.388996	0.0477542
cg03823149	0.410796	0.395212	0.0155846	0.120378	0.112215	0.00816304	0.152221	0.127316	0.0249048	0.069341	0.0531696	0.0161714
cg03828160	0.244531	0.194848	0.0496825	0.568788	0.561224	0.00756335	0.75775	0.728411	0.0293397	0.590483	0.580034	0.0104492
cg03829216	0.673765	0.693991	-0.0202259	0.549794	0.56423	-0.0144357	0.793979	0.81926	-0.0252808	0.522841	0.570041	-0.0472003
cg03829491	0.56803	0.53454	0.0334905	0.706357	0.721267	-0.0149099	0.439007	0.419726	0.0192813	0.649162	0.651491	-0.00232919
cg03832506	0.829866	0.847358	-0.0174918	0.920858	0.920914	-5.60883e-05	0.59553	0.601109	-0.00557829	0.907381	0.81466	0.0927207
cg03833774	0.846935	0.830288	0.0166467	0.490501	0.496739	-0.00623752	0.493212	0.495739	-0.002527	0.677476	0.669386	0.00808945
cg03834574	0.572513	0.549685	0.0228279	0.574632	0.571983	0.0026486	0.64409	0.645599	-0.00150916	0.560375	0.541434	0.0189413
cg03838168	0.513008	0.515742	-0.00273349	0.74134	0.775599	-0.0342586	0.589819	0.628447	-0.0386284	0.599825	0.555194	0.0446309
cg03842291	0.244885	0.275264	-0.0303787	0.412989	0.423596	-0.0106066	0.323388	0.288275	0.0351133	0.257751	0.236782	0.0209691
cg03845359	0.420174	0.385328	0.0348465	0.161008	0.160992	1.68142e-05	0.19183	0.180431	0.011399	0.493857	0.510199	-0.0163419
cg03845409	0.0806626	0.0832466	-0.00258397	0.327334	0.33852	-0.0111861	0.160592	0.141226	0.0193663	0.187381	0.191796	-0.00441487
cg03853861	0.314481	0.362066	-0.0475846	0.618294	0.59761	0.020684	0.502186	0.501573	0.000613003	0.407808	0.405485	0.00232274
cg03858262	0.263842	0.264088	-0.00024601	0.238416	0.231106	0.00730964	0.309139	0.315636	-0.00649669	0.441154	0.44546	-0.00430604
cg03859891	0.951792	0.952528	-0.000735449	0.921119	0.947998	-0.0268788	0.515118	0.510639	0.00447905	0.930261	0.948982	-0.0187203
cg03867952	0.563247	0.546682	0.0165653	0.229816	0.258056	-0.0282393	0.707456	0.695859	0.0115973	0.650497	0.681581	-0.031084
cg03878985	0.18302	0.168823	0.014197	0.426565	0.424213	0.00235186	0.561196	0.573359	-0.0121625	0.47889	0.476747	0.00214337
cg03885028	0.832641	0.829042	0.00359829	0.0551653	0.03845	0.0167153	0.652377	0.66242	-0.0100431	0.891673	0.866731	0.0249419
cg03887211	0.323725	0.221283	0.102442	0.669328	0.688591	-0.0192633	0.369992	0.350395	0.0195969	0.300254	0.283431	0.0168231
cg03887682	0.200447	0.174601	0.0258453	0.134644	0.108419	0.0262249	0.0910368	0.0800764	0.0109604	0.0637431	0.0378646	0.0258786
cg03892157	0.674836	0.670943	0.0038928	0.215857	0.216598	-0.000740923	0.23317	0.197856	0.0353138	0.500244	0.448113	0.0521313
cg03895284	0.667953	0.66063	0.00732225	0.79061	0.771617	0.0189932	0.389841	0.388263	0.00157865	0.741016	0.698931	0.0420854
cg03897851	0.55606	0.515927	0.0401334	0.445491	0.4705	-0.0250092	0.438809	0.440544	-0.00173488	0.587637	0.580891	0.0067465
cg03906572	0.566172	0.568232	-0.00206025	0.552809	0.546455	0.00635417	0.653135	0.725082	-0.0719466	0.530665	0.542139	-0.0114745
cg03909472	0.16435	0.162896	0.00145428	0.0936144	0.116628	-0.0230137	0.159819	0.136859	0.0229597	0.167481	0.1421	0.0253813
cg03910337	0.319765	0.329176	-0.0094111	0.374091	0.369663	0.00442767	0.629737	0.559651	0.0700858	0.533282	0.555122	-0.0218405
cg03915527	0.803683	0.750624	0.0530586	0.719717	0.717916	0.00180116	0.562598	0.547853	0.0147458	0.339975	0.307517	0.0324582
cg03915742	0.533733	0.555105	-0.0213724	0.598358	0.621993	-0.0236347	0.794136	0.765105	0.029031	0.568791	0.587475	-0.0186847
cg03927113	0.0443543	0.0487207	-0.00436643	0.0330597	0.0374148	-0.00435511	0.032711	0.0560247	-0.0233137	0.0401065	0.0380336	0.00207289
cg03927302	0.181548	0.157139	0.024409	0.319979	0.310697	0.00928205	0.0561662	0.0863517	-0.0301856	0.0837459	0.116465	-0.0327195
cg03931619	0.62733	0.624223	0.00310708	0.735962	0.735464	0.000498942	0.359491	0.367495	-0.00800355	0.595417	0.564159	0.0312577
cg03933846	0.475638	0.465594	0.0100443	0.183001	0.194114	-0.0111131	0.733003	0.694279	0.0387238	0.598552	0.585804	0.0127488
cg03934360	0.454887	0.453667	0.00121975	0.550575	0.537104	0.0134716	0.473698	0.470664	0.00303424	0.489607	0.498289	-0.00868221
cg03937594	0.852658	0.859046	-0.00638802	0.684402	0.681415	0.00298693	0.868572	0.864201	0.00437116	0.844196	0.844666	-0.000469513
cg03939693	0.41935	0.429446	-0.0100958	0.206469	0.214561	-0.00809247	0.461663	0.483943	-0.0222798	0.528865	0.519273	0.00959156
cg03941517	0.222931	0.219609	0.00332235	0.470351	0.464804	0.00554682	0.574565	0.591282	-0.0167171	0.232183	0.234537	-0.0023535
cg03942390	0.563099	0.560832	0.00226694	0.508958	0.473923	0.0350351	0.420222	0.41324	0.00698136	0.325958	0.334791	-0.00883263
cg03950785	0.218435	0.277886	-0.0594514	0.433025	0.423185	0.00983959	0.567813	0.564893	0.00292019	0.348025	0.343469	0.00455598
cg03952112	0.474222	0.49579	-0.0215687	0.465524	0.472362	-0.00683804	0.588651	0.568924	0.0197271	0.510463	0.475393	0.0350706
cg03957435	0.197992	0.158025	0.0399667	0.0690152	0.065731	0.00328419	0.320232	0.319419	0.000812866	0.277278	0.365601	-0.0883223
cg03958104	0.619638	0.593395	0.026243	0.573917	0.481507	0.0924098	0.469311	0.508918	-0.0396066	0.743677	0.694083	0.0495932
cg03959079	0.0826588	0.0977776	-0.0151188	0.0618377	0.0565285	0.00530914	0.0686648	0.0826728	-0.014008	0.0671432	0.0686609	-0.00151769
cg03960747	0.662331	0.653032	0.00929853	0.665977	0.663965	0.00201247	0.596187	0.581025	0.0151617	0.678277	0.673051	0.00522612
cg03962288	0.728772	0.668315	0.0604565	0.776903	0.755495	0.0214073	0.843616	0.819063	0.0245535	0.649	0.632175	0.0168245
cg03966679	0.672968	0.664757	0.00821111	0.803892	0.813547	-0.0096544	0.831409	0.827371	0.00403812	0.823889	0.852529	-0.02864
cg03972560	0.0762359	0.0850405	-0.00880461	0.0811624	0.0906084	-0.00944603	0.0224684	0.0508097	-0.0283413	0.0312192	0.0376061	-0.00638691
cg03990195	0.244384	0.219832	0.0245523	0.249475	0.243976	0.0054989	0.424105	0.418371	0.00573375	0.453207	0.453718	-0.000511432
cg03991766	0.156091	0.158245	-0.00215358	0.125278	0.127848	-0.00257027	0.516224	0.501435	0.0147891	0.68165	0.702308	-0.0206577
cg03992069	0.477922	0.522343	-0.0444208	0.502258	0.508714	-0.00645517	0.680176	0.676506	0.00367074	0.11167	0.120006	-0.00833646
cg03992092	0.0608229	0.0442525	0.0165704	0.0682436	0.0530925	0.0151511	0.0877855	0.113842	-0.0260566	0.192109	0.153373	0.038736
cg03993368	0.499945	0.497638	0.00230659	0.310135	0.298991	0.0111436	0.580543	0.572946	0.00759706	0.11819	0.109531	0.00865888
cg03993934	0.230483	0.268331	-0.0378471	0.363048	0.35502	0.00802777	0.14063	0.156609	-0.015979	0.102082	0.105512	-0.00343037
cg03995238	0.346306	0.353362	-0.00705574	0.410949	0.41994	-0.00899154	0.528192	0.536284	-0.00809225	0.3858	0.413443	-0.0276429
cg04010032	0.608838	0.611044	-0.00220571	0.649192	0.66256	-0.0133681	0.781877	0.777468	0.00440933	0.631636	0.652299	-0.0206623
cg04023829	0.222247	0.23657	-0.0143233	0.150913	0.16878	-0.0178673	0.217245	0.226103	-0.00885715	0.322123	0.331716	-0.00959313
cg04025582	0.594686	0.608297	-0.013611	0.580617	0.600362	-0.0197459	0.338241	0.334886	0.00335437	0.58462	0.579595	0.00502426
cg04029366	0.866119	0.864167	0.00195134	0.914301	0.912736	0.00156542	0.849792	0.872188	-0.0223964	0.659273	0.679238	-0.0199645
cg04029630	0.540914	0.515151	0.0257625	0.512981	0.519727	-0.00674633	0.556241	0.530665	0.0255764	0.475514	0.456966	0.018548
cg04032096	0.384668	0.410944	-0.0262761	0.0625736	0.0760891	-0.0135154	0.106799	0.0721343	0.0346649	0.370726	0.383768	-0.0130419
cg04032503	0.900887	0.886484	0.0144033	0.637213	0.647642	-0.010429	0.577876	0.546086	0.0317905	0.929876	0.933955	-0.00407932
cg04032861	0.0348383	0.0351623	-0.000324025	0.0517068	0.0472117	0.00449506	0.0711063	0.0663397	0.00476654	0.0503686	0.0486628	0.0017058
cg04035233	0.582469	0.623687	-0.0412179	0.581971	0.481446	0.100524	0.43731	0.402056	0.0352538	0.519324	0.448644	0.0706801
cg04039555	0.485639	0.486887	-0.00124763	0.71785	0.722952	-0.00510119	0.823301	0.828413	-0.00511168	0.581869	0.611588	-0.0297193
cg04044631	0.735329	0.702376	0.0329529	0.875027	0.852529	0.0224981	0.497252	0.504684	-0.0074315	0.587942	0.593573	-0.00563023
cg04044694	0.430164	0.418566	0.011598	0.108434	0.121682	-0.0132474	0.55884	0.559513	-0.000673	0.295696	0.306136	-0.0104401
cg04051266	0.394755	0.408276	-0.013521	0.346177	0.366691	-0.0205137	0.412001	0.41988	-0.00787833	0.325164	0.313953	0.0112108
cg04053131	0.590247	0.584511	0.00573641	0.571643	0.561177	0.0104667	0.458231	0.451175	0.00705623	0.564719	0.542065	0.0226546
cg04058675	0.697612	0.730553	-0.0329415	0.767112	0.745692	0.0214192	0.463262	0.404278	0.0589836	0.545658	0.525761	0.0198969
cg04059198	0.611586	0.617773	-0.00618742	0.544377	0.619101	-0.0747238	0.793813	0.787939	0.00587403	0.575287	0.583669	-0.008382
cg04059980	0.642744	0.663385	-0.0206402	0.761376	0.755048	0.00632855	0.409221	0.384105	0.0251158	0.747257	0.70979	0.0374673
cg04061482	0.516799	0.517278	-0.000479523	0.559643	0.591423	-0.0317801	0.498802	0.524542	-0.0257399	0.529294	0.589853	-0.0605588
cg04064330	0.58983	0.603287	-0.0134573	0.701586	0.712065	-0.0104791	0.457536	0.452923	0.00461238	0.494793	0.458307	0.0364856
cg04064672	0.262399	0.285499	-0.0231001	0.344264	0.337633	0.00663021	0.066828	0.0648411	0.00198692	0.465049	0.447082	0.017967
cg04069100	0.677252	0.670046	0.00720512	0.434019	0.407681	0.0263375	0.465386	0.454102	0.011284	0.759105	0.765506	-0.00640095
cg04069311	0.142953	0.167553	-0.0245998	0.170764	0.161861	0.00890314	0.240283	0.216489	0.023794	0.56717	0.552199	0.0149707
cg04069374	0.550298	0.580425	-0.0301266	0.574212	0.589304	-0.0150919	0.771867	0.752348	0.0195192	0.530366	0.521642	0.00872381
cg04069419	0.196953	0.193093	0.00386077	0.099973	0.0713951	0.0285778	0.134182	0.156967	-0.0227852	0.455928	0.434293	0.0216349
cg04070122	0.342481	0.326322	0.0161591	0.427925	0.432862	-0.00493677	0.480231	0.474907	0.00532404	0.380719	0.359005	0.0217141
cg04071644	0.0328133	0.0279806	0.00483269	0.0364918	0.0240869	0.0124049	0.0322085	0.0295062	0.00270226	0.0278125	0.0497154	-0.0219029
cg04071770	0.703851	0.709078	-0.00522726	0.599061	0.601554	-0.00249313	0.511882	0.516721	-0.00483883	0.602039	0.598006	0.00403238
cg04075827	0.776929	0.741082	0.0358464	0.525329	0.530187	-0.00485855	0.50111	0.471006	0.0301038	0.581969	0.650025	-0.0680564
cg04077363	0.10691	0.100491	0.00641898	0.0853784	0.0846299	0.000748464	0.133497	0.0898527	0.0436443	0.0650257	0.0753593	-0.0103336
cg04101819	0.746565	0.717637	0.0289281	0.594896	0.615121	-0.0202247	0.554039	0.550099	0.00393998	0.876437	0.895811	-0.0193744
cg04103377	0.878834	0.854041	0.0247937	0.576443	0.527086	0.0493574	0.673208	0.644609	0.0285989	0.907241	0.903283	0.00395788
cg04109661	0.909847	0.898493	0.0113532	0.86242	0.85299	0.00943047	0.857434	0.851218	0.00621628	0.803421	0.815451	-0.0120299
cg04118889	0.601047	0.662062	-0.0610147	0.427506	0.420774	0.00673238	0.656528	0.729998	-0.0734707	0.585823	0.620929	-0.0351059
cg04123347	0.837094	0.868687	-0.0315932	0.907778	0.842494	0.065284	0.531108	0.511972	0.0191355	0.821328	0.863838	-0.0425093
cg04128303	0.49592	0.531421	-0.0355016	0.273723	0.266592	0.00713158	0.399907	0.420598	-0.0206909	0.454474	0.494444	-0.0399705
cg04137897	0.568913	0.535982	0.0329318	0.584823	0.588336	-0.00351373	0.517176	0.508477	0.00869917	0.382336	0.420723	-0.038387
cg04143870	0.0718265	0.0663904	0.00543604	0.122874	0.137538	-0.0146639	0.157175	0.101391	0.0557838	0.141386	0.137033	0.00435304
cg04144603	0.162113	0.168635	-0.00652172	0.0787896	0.065309	0.0134806	0.0774622	0.0790433	-0.00158103	0.542346	0.519851	0.0224955
cg04150893	0.519127	0.494805	0.0243221	0.0806219	0.072289	0.00833288	0.482585	0.472114	0.010471	0.491599	0.530503	-0.0389039
cg04155024	0.576359	0.473271	0.103088	0.563477	0.515853	0.0476248	0.418946	0.400942	0.018004	0.455022	0.489147	-0.0341249
cg04162504	0.812605	0.841443	-0.0288387	0.574565	0.535547	0.0390171	0.457057	0.47889	-0.0218335	0.899438	0.953261	-0.0538229
cg04167725	0.851531	0.855364	-0.00383245	0.787107	0.824745	-0.0376381	0.871411	0.919474	-0.0480626	0.802866	0.872014	-0.0691481
cg04173432	0.884184	0.901209	-0.0170251	0.920776	0.914107	0.00666893	0.608313	0.604807	0.00350633	0.877492	0.929175	-0.0516827
cg04174234	0.392603	0.389892	0.00271158	0.20446	0.213527	-0.00906708	0.190284	0.163318	0.0269668	0.281034	0.262416	0.0186179
cg04174838	0.0541325	0.0469691	0.00716334	0.0697085	0.069193	0.000515589	0.0981287	0.127962	-0.0298329	0.0602889	0.065731	-0.00544208
cg04177332	0.423685	0.374975	0.0487097	0.41391	0.435165	-0.0212554	0.102393	0.0924473	0.00994582	0.202024	0.187632	0.0143926
cg04177426	0.632877	0.578324	0.0545528	0.877638	0.785248	0.0923907	0.936801	0.923595	0.0132058	0.633658	0.638075	-0.00441723
cg04182378	0.264788	0.2563	0.00848814	0.192726	0.189718	0.00300872	0.640261	0.605518	0.0347427	0.157945	0.1526	0.0053449
cg04182474	0.867231	0.854961	0.0122701	0.874334	0.884503	-0.0101698	0.596929	0.587881	0.00904729	0.59574	0.550058	0.0456824
cg04183498	0.233098	0.227237	0.00586089	0.480231	0.517171	-0.0369397	0.660386	0.669578	-0.00919155	0.515698	0.55018	-0.0344816
cg04185841	0.238674	0.267869	-0.0291951	0.296627	0.291987	0.00463997	0.289774	0.250162	0.0396118	0.411444	0.357905	0.0535384
cg04186471	0.722294	0.768663	-0.0463693	0.758016	0.770783	-0.0127665	0.619607	0.607759	0.011848	0.756304	0.764904	-0.00859982
cg04189389	0.598827	0.629672	-0.0308454	0.39369	0.434093	-0.0404024	0.0752928	0.0872102	-0.0119174	0.33295	0.264484	0.0684657
cg04189697	0.475994	0.457347	0.0186477	0.48296	0.468831	0.0141292	0.114896	0.102188	0.0127085	0.361668	0.345209	0.016459
cg04189723	0.602934	0.634048	-0.0311142	0.557101	0.566384	-0.00928276	0.469142	0.465969	0.00317361	0.0624692	0.0475155	0.0149537
cg04210922	0.401574	0.422443	-0.0208689	0.209772	0.208492	0.00127963	0.335587	0.332769	0.00281864	0.64817	0.633567	0.0146028
cg04211807	0.320534	0.322787	-0.00225298	0.638492	0.636491	0.0020015	0.181516	0.208322	-0.0268062	0.26107	0.238653	0.0224174
cg04217946	0.573874	0.570627	0.00324627	0.55015	0.568959	-0.0188086	0.84588	0.83792	0.00795904	0.488297	0.483584	0.00471263
cg04221167	0.784513	0.776688	0.00782533	0.626818	0.598006	0.0288114	0.873647	0.867586	0.00606076	0.721302	0.72398	-0.00267822
cg04223454	0.189017	0.211393	-0.0223756	0.191443	0.189982	0.0014605	0.116647	0.131282	-0.014635	0.357497	0.319732	0.0377645
cg04224247	0.28426	0.282366	0.00189372	0.469529	0.429996	0.0395332	0.833309	0.846591	-0.0132814	0.819952	0.795717	0.0242346
cg04227026	0.285389	0.238968	0.0464203	0.123894	0.12659	-0.00269527	0.0710152	0.0736043	-0.00258911	0.217474	0.204419	0.0130556
cg04227528	0.561774	0.567333	-0.00555935	0.556992	0.532353	0.0246394	0.519456	0.540792	-0.0213356	0.64466	0.670126	-0.0254656
cg04227631	0.0362424	0.0202957	0.0159467	0.0531353	0.0252572	0.027878	0.0440912	0.0398229	0.00426831	0.027927	0.0269506	0.000976357
cg04227643	0.137458	0.134206	0.00325161	0.18452	0.186128	-0.00160833	0.12396	0.0479853	0.0759744	0.189306	0.191623	-0.00231774
cg04235544	0.511782	0.535681	-0.0238984	0.570965	0.505457	0.065508	0.407495	0.422302	-0.0148069	0.615708	0.614101	0.00160726
cg04238548	0.464736	0.470915	-0.0061782	0.459421	0.476489	-0.0170686	0.661306	0.646997	0.0143089	0.4568	0.458007	-0.00120622
cg04238575	0.405846	0.441481	-0.0356345	0.45097	0.460524	-0.00955423	0.657902	0.70111	-0.0432075	0.42748	0.428803	-0.00132396
cg04240856	0.464204	0.483151	-0.0189469	0.117829	0.114025	0.00380429	0.442702	0.415504	0.0271986	0.417145	0.470954	-0.0538097
cg04241572	0.428951	0.426298	0.00265354	0.450489	0.447455	0.00303404	0.564135	0.590015	-0.0258801	0.0612648	0.0558787	0.00538615
cg04243127	0.765498	0.83754	-0.072042	0.609577	0.532532	0.0770455	0.801111	0.796268	0.00484247	0.759933	0.734527	0.0254064
cg04262605	0.125073	0.124135	0.000938144	0.538922	0.541672	-0.00275044	0.279245	0.272272	0.00697295	0.486143	0.500473	-0.01433
cg04271131	0.125924	0.160506	-0.0345819	0.138055	0.143645	-0.00559014	0.0918315	0.149413	-0.0575813	0.565577	0.534286	0.0312908
cg04277998	0.427053	0.43595	-0.00889727	0.403814	0.448927	-0.0451128	0.264375	0.255218	0.0091572	0.35861	0.431591	-0.0729817
cg04279920	0.387234	0.379005	0.00822871	0.264375	0.255106	0.00926882	0.0898935	0.085753	0.00414046	0.359727	0.321427	0.0383003
cg04282422	0.920847	0.890479	0.030368	0.887117	0.895394	-0.0082767	0.900223	0.902277	-0.00205427	0.871092	0.902017	-0.030926
cg04283377	0.234512	0.222384	0.0121279	0.268691	0.292737	-0.0240458	0.274468	0.276221	-0.0017531	0.122837	0.135553	-0.0127158
cg04287191	0.0896339	0.0855011	0.00413279	0.0607985	0.0517009	0.00909757	0.070744	0.060182	0.010562	0.0396543	0.0530079	-0.0133536
cg04287686	0.0685351	0.0752448	-0.00670967	0.138849	0.153497	-0.014648	0.177674	0.215012	-0.0373378	0.0410916	0.0953261	-0.0542345
cg04288265	0.457712	0.475954	-0.0182419	0.391054	0.386296	0.00475806	0.378653	0.38328	-0.00462688	0.490924	0.4863	0.00462427
cg04289416	0.686094	0.691895	-0.00580095	0.632262	0.60459	0.0276717	0.478137	0.501041	-0.0229041	0.741946	0.746114	-0.00416871
cg04290766	0.788468	0.775861	0.0126066	0.730527	0.741979	-0.0114522	0.54672	0.542123	0.00459791	0.762781	0.770106	-0.00732473
cg04297329	0.454727	0.422811	0.0319165	0.431058	0.457207	-0.0261495	0.588384	0.573779	0.0146047	0.482958	0.485521	-0.00256243
cg04297522	0.831175	0.813897	0.017278	0.845591	0.841037	0.00455429	0.522862	0.522749	0.000112909	0.789214	0.811419	-0.0222054
cg04297907	0.441408	0.444916	-0.00350842	0.280982	0.294251	-0.013269	0.528137	0.53164	-0.00350381	0.0623808	0.0879794	-0.0255986
cg04300278	0.552514	0.535246	0.0172681	0.89867	0.895932	0.00273828	0.588307	0.602539	-0.0142318	0.575492	0.584846	-0.00935376
cg04302192	0.0431286	0.0595566	-0.016428	0.0603164	0.0687184	-0.00840204	0.127737	0.137195	-0.00945823	0.0521923	0.0579904	-0.00579816
cg04308274	0.371439	0.336809	0.0346299	0.132429	0.137688	-0.00525838	0.0676539	0.0784217	-0.0107678	0.20771	0.203238	0.0044729
cg04310247	0.0954222	0.110039	-0.0146171	0.369697	0.398112	-0.0284157	0.422972	0.411093	0.0118783	0.0811468	0.0581293	0.0230175
cg04312965	0.912271	0.924718	-0.0124472	0.863931	0.892036	-0.0281052	0.904314	0.904174	0.000140238	0.901052	0.914978	-0.0139257
cg04317926	0.908182	0.90398	0.00420151	0.89759	0.913861	-0.0162712	0.495587	0.496562	-0.000974507	0.866904	0.873655	-0.00675115
cg04318320	0.17535	0.21628	-0.0409297	0.205783	0.199987	0.00579593	0.563477	0.565036	-0.00155906	0.535387	0.543659	-0.00827203
cg04323365	0.895769	0.893867	0.00190191	0.920367	0.921291	-0.000924168	0.750358	0.750419	-6.13405e-05	0.90976	0.904457	0.00530314
cg04324559	0.158983	0.15736	0.00162308	0.390446	0.395666	-0.00521982	0.526492	0.524488	0.00200339	0.399508	0.382278	0.0172299
cg04325187	0.898451	0.905834	-0.00738287	0.624265	0.603127	0.0211375	0.843193	0.863109	-0.0199167	0.603562	0.56561	0.037952
cg04327763	0.589173	0.607666	-0.0184926	0.569576	0.597421	-0.0278448	0.758981	0.772974	-0.0139924	0.600187	0.621713	-0.0215258
cg04329736	0.450755	0.616206	-0.165451	0.586078	0.452462	0.133616	0.474729	0.456387	0.0183416	0.488481	0.420723	0.0677583
cg04331647	0.123398	0.123458	-5.96452e-05	0.201477	0.174245	0.0272322	0.244021	0.212058	0.0319628	0.0934606	0.102137	-0.00867605
cg04334684	0.156246	0.173014	-0.0167681	0.450196	0.450154	4.18551e-05	0.219564	0.244664	-0.0251004	0.419306	0.404471	0.0148345
cg04335355	0.0650707	0.0626486	0.00242213	0.418459	0.353444	0.0650141	0.223502	0.226238	-0.00273589	0.362463	0.372644	-0.0101816
cg04336572	0.730602	0.764836	-0.0342331	0.733381	0.712988	0.0203933	0.79293	0.805078	-0.0121476	0.413124	0.43915	-0.0260266
cg04337034	NA	0.875159	NA	0.821271	0.82509	-0.00381879	0.878735	0.854368	0.024367	0.822134	0.782383	0.039751
cg04342295	0.603335	0.636823	-0.0334872	0.596187	0.625545	-0.0293586	0.70566	0.694446	0.0112135	0.568185	0.550612	0.0175731
cg04345928	0.413681	0.451703	-0.0380227	0.335227	0.31848	0.0167464	0.588559	0.602283	-0.0137238	0.42846	0.457792	-0.0293325
cg04364889	0.131413	0.11295	0.018463	0.112574	0.161611	-0.0490368	0.203761	0.223792	-0.0200317	0.134555	0.126254	0.00830135
cg04368919	0.431086	0.445713	-0.0146267	0.550334	0.576607	-0.0262733	0.0892295	0.0978204	-0.0085908	0.519391	0.507998	0.0113937
cg04369555	0.296574	0.338102	-0.041528	0.156387	0.157982	-0.00159496	0.545339	0.549802	-0.00446244	0.404278	0.392019	0.012259
cg04369574	0.538411	0.495215	0.043196	0.610938	0.609511	0.00142648	0.638492	0.644609	-0.00611734	0.608469	0.615699	-0.00723034
cg04376185	0.618464	0.61423	0.00423372	0.95001	0.955381	-0.00537118	0.760561	0.798711	-0.0381502	0.580337	0.612428	-0.0320914
cg04381495	0.474107	0.469226	0.00488115	0.454684	0.433833	0.0208505	0.441442	0.438328	0.0031141	0.640474	0.655201	-0.0147268
cg04384873	0.684014	0.663139	0.0208751	0.912731	0.915979	-0.00324865	0.907419	0.920623	-0.0132036	0.918335	0.922886	-0.00455156
cg04388053	0.195744	0.19784	-0.00209577	0.647933	0.648448	-0.000515066	0.426751	0.43597	-0.00921945	0.563368	0.58623	-0.0228623
cg04388383	0.499113	0.5361	-0.0369873	0.515919	0.540377	-0.0244582	0.657399	0.722088	-0.0646891	0.547253	0.543216	0.00403704
cg04392209	0.0763261	0.0781206	-0.00179452	0.147326	0.139273	0.00805287	0.23387	0.245407	-0.0115372	0.077693	0.0764578	0.00123519
cg04393989	0.857889	0.841619	0.0162708	0.846054	0.861661	-0.0156067	0.82201	0.835451	-0.0134413	0.816282	0.868696	-0.0524141
cg04395332	0.190714	0.171466	0.019248	0.201648	0.191968	0.00967989	0.0802974	0.0766815	0.0036159	0.047923	0.0479883	-6.53253e-05
cg04397441	0.138218	0.143545	-0.00532684	0.187305	0.199655	-0.0123499	0.546967	0.538367	0.00859972	0.207027	0.221874	-0.0148465
cg04399994	0.53939	0.521063	0.0183267	0.580339	0.543507	0.0368317	0.277852	0.289359	-0.0115076	0.231384	0.249248	-0.0178643
cg04402371	0.914962	0.895924	0.0190384	0.698579	0.667917	0.0306624	0.877403	0.890813	-0.0134095	0.911743	0.930251	-0.0185084
cg04402486	0.430804	0.451851	-0.0210472	0.0557086	0.0391316	0.016577	0.313128	0.32563	-0.0125022	0.483943	0.518569	-0.0346266
cg04402798	0.631587	0.616302	0.0152842	0.587377	0.592249	-0.00487208	0.721849	0.67525	0.0465984	0.550381	0.547873	0.00250807
cg04406445	0.358507	0.356657	0.00185027	0.495905	0.503055	-0.00715068	0.580094	0.606433	-0.026339	0.458354	0.467712	-0.00935834
cg04414245	0.873473	0.893379	-0.0199058	0.851923	0.88562	-0.0336975	0.595094	0.605642	-0.0105485	0.828622	0.806885	0.0217367
cg04414946	0.611902	0.611709	0.00019291	0.606143	0.600009	0.00613352	0.4919	0.500742	-0.00884213	0.569261	0.571946	-0.00268564
cg04419618	0.466112	0.497806	-0.0316935	0.470173	0.520905	-0.0507319	0.6427	0.722868	-0.0801678	0.445343	0.4705	-0.0251575
cg04424654	0.547906	0.585337	-0.0374308	0.400978	0.377017	0.0239607	0.801915	0.838079	-0.0361648	0.213199	0.207787	0.00541261
cg04427987	0.854426	0.884862	-0.0304359	0.840267	0.815071	0.0251965	0.485815	0.486333	-0.000517715	0.840461	0.8703	-0.0298387
cg04437194	0.68121	0.701202	-0.0199918	0.60761	0.621208	-0.0135978	0.836157	0.829561	0.00659633	0.847888	0.837462	0.010426
cg04437234	0.576493	0.619506	-0.0430135	0.617925	0.643768	-0.0258421	0.377043	0.369988	0.00705505	0.568623	0.555723	0.0129001
cg04455030	0.0908034	0.0888514	0.00195199	0.341733	0.330997	0.0107363	0.23115	0.242806	-0.0116565	0.144782	0.149908	-0.0051264
cg04455999	0.534302	0.538656	-0.00435358	0.54682	0.555194	-0.00837326	0.708099	0.704044	0.00405423	0.139239	0.141443	-0.00220406
cg04464742	0.106134	0.108785	-0.00265076	0.579056	0.592394	-0.0133384	0.0610111	0.0406674	0.0203437	0.547094	0.564748	-0.0176536
cg04477336	0.740218	0.770219	-0.0300009	0.862121	0.819909	0.042212	0.542378	0.52434	0.0180384	0.758453	0.73303	0.0254225
cg04483741	0.559984	0.527133	0.0328514	0.502827	0.487446	0.0153807	0.53014	0.539581	-0.00944077	0.497689	0.504554	-0.00686497
cg04483797	0.736119	0.727634	0.00848583	0.682092	0.69123	-0.00913775	0.811823	0.81695	-0.00512617	0.670827	0.709978	-0.0391513
cg04484695	0.0455664	0.0460586	-0.000492265	0.0544863	0.0742243	-0.019738	0.0579736	0.0510067	0.0069669	0.0393696	0.0446976	-0.00532801
cg04486022	0.640503	0.632085	0.00841793	0.731229	0.760428	-0.0291986	0.714447	0.66475	0.049697	0.468519	0.506288	-0.0377689
cg04488527	0.452469	0.44759	0.00487817	NA	0.539601	NA	0.862289	0.863847	-0.00155796	0.831364	0.82584	0.00552428
cg04489366	0.19349	0.255468	-0.0619788	0.325465	0.31238	0.0130854	0.0216643	0.0220803	-0.000416042	0.21816	0.212585	0.0055753
cg04491396	0.227269	0.274505	-0.0472359	0.360384	0.367281	-0.00689639	0.692781	0.675709	0.0170724	0.4618	0.499296	-0.037496
cg04492048	0.118216	0.117061	0.00115524	0.201995	0.213746	-0.0117512	0.434167	0.421258	0.0129084	0.326409	0.391447	-0.0650379
cg04493740	0.371679	0.377511	-0.00583271	0.404866	0.406149	-0.00128229	0.514708	0.540451	-0.0257425	0.426203	0.44064	-0.0144365
cg04497165	0.131622	0.132458	-0.000835208	0.427004	0.457489	-0.0304854	0.348538	0.36845	-0.019912	0.0462647	0.0665239	-0.0202593
cg04499381	0.330291	0.328688	0.00160367	0.0983882	0.113676	-0.0152873	0.191661	0.202024	-0.0103636	0.274626	0.284272	-0.00964619
cg04501372	0.536717	0.551972	-0.0152551	0.54005	0.5723	-0.0322501	0.664787	0.650497	0.0142903	0.55156	0.495856	0.0557035
cg04515986	0.286428	0.229571	0.056857	0.497827	0.545675	-0.0478481	0.0285644	0.0638939	-0.0353294	0.55675	0.476662	0.0800881
cg04528545	0.854127	0.863219	-0.00909194	0.554275	0.578993	-0.0247173	0.594799	0.589498	0.00530103	0.432384	0.473699	-0.0413149
cg04529406	0.177709	0.173514	0.00419489	0.0612768	0.0632071	-0.0019303	0.619128	0.623944	-0.00481639	0.16799	0.180225	-0.0122348
cg04532200	0.421688	0.420988	0.000700371	0.358331	0.357226	0.00110533	0.387011	0.397206	-0.0101949	0.40874	0.422017	-0.0132774
cg04535803	0.600972	0.616069	-0.0150969	0.512746	0.570754	-0.0580071	0.382686	0.387991	-0.00530544	0.104525	0.0987358	0.005789
cg04544154	0.890634	0.896611	-0.00597715	0.907419	0.873655	0.0337641	0.904453	0.8934	0.0110537	0.897432	0.873559	0.0238727
cg04544498	0.0840689	0.082451	0.00161785	0.42901	0.450745	-0.0217354	0.300067	0.321924	-0.0218575	0.11996	0.113484	0.00647622
cg04545159	0.814502	0.743376	0.0711264	0.581762	0.550268	0.031494	0.462711	0.473414	-0.0107025	0.700179	0.746604	-0.0464253
cg04549977	0.561691	0.576647	-0.0149553	0.535376	0.499871	0.035505	0.580814	0.546542	0.034272	0.567942	0.526642	0.0412995
cg04553232	0.0560476	0.0587308	-0.00268319	0.0624405	0.0595021	0.00293842	0.0430184	0.0875806	-0.0445622	0.0589197	0.0514998	0.00741992
cg04557963	0.464461	0.446538	0.0179229	0.708717	0.728551	-0.0198344	0.461663	0.478963	-0.0173001	0.475955	0.484506	-0.00855109
cg04562662	0.847961	0.832386	0.0155751	0.777801	0.796934	-0.0191329	0.622893	0.615517	0.0073761	0.586908	0.512625	0.0742835
cg04565250	0.0536623	0.0487773	0.00488497	0.0395132	0.0398902	-0.000377057	0.0432796	0.0653627	-0.0220832	0.305336	0.311147	-0.00581108
cg04569165	0.391679	0.396447	-0.00476798	0.738531	0.735993	0.00253744	0.603406	0.597631	0.00577489	0.463248	0.470137	-0.00688879
cg04574723	0.367764	0.366111	0.00165301	0.674225	0.681123	-0.0068978	0.545708	0.561202	-0.0154935	0.660353	0.650742	0.00961125
cg04581892	0.475273	0.505281	-0.0300081	0.687067	0.678512	0.00855473	0.417158	0.425911	-0.00875218	0.471247	0.473189	-0.00194248
cg04584307	0.934179	0.925376	0.00880298	0.88597	0.933499	-0.0475295	0.924575	0.916348	0.00822726	0.932055	0.910003	0.0220524
cg04587983	0.911765	0.877629	0.0341368	0.630848	0.617591	0.0132569	0.862795	0.868157	-0.00536294	0.889699	0.881819	0.00788066
cg04593531	0.0577573	0.043735	0.0140223	0.0926293	0.0752362	0.0173931	0.0951757	0.113539	-0.0183631	0.0631996	0.0513042	0.0118955
cg04594276	0.49952	0.540911	-0.0413911	0.114896	0.0816584	0.0332377	0.49114	0.468833	0.0223067	0.691586	0.642402	0.0491847
cg04595053	0.368609	0.429682	-0.0610727	0.658542	0.656456	0.00208605	0.509453	0.510187	-0.000734167	0.772028	0.712232	0.0597956
cg04596655	0.601149	0.652729	-0.0515807	0.513844	0.564915	-0.0510705	0.742052	0.747143	-0.00509084	0.517632	0.545727	-0.0280947
cg04598095	0.409657	0.408694	0.000962756	0.177046	0.150517	0.0265295	0.279741	0.255457	0.0242839	0.324777	0.318305	0.00647207
cg04598328	0.71764	0.706454	0.0111858	0.724167	0.734527	-0.0103594	0.48515	0.49422	-0.00906953	0.708554	0.72236	-0.0138058
cg04598760	0.0749923	0.0754883	-0.000495952	0.416841	0.372437	0.0444039	0.0515584	0.0758004	-0.024242	0.349082	0.378548	-0.0294663
cg04599817	0.353961	0.427549	-0.0735878	0.196675	0.192435	0.00424063	0.197125	0.224488	-0.0273635	0.399302	0.36571	0.0335914
cg04602218	0.0910142	0.0936238	-0.00260955	0.51182	0.488671	0.0231491	0.375564	0.379072	-0.00350761	0.115153	0.120158	-0.00500462
cg04613080	0.0629906	0.0640682	-0.00107756	0.0490026	0.0506244	-0.00162186	0.0758511	0.0700015	0.00584959	0.126269	0.112699	0.0135698
cg04619644	0.898922	0.891651	0.00727147	0.65391	0.649081	0.00482919	0.750653	0.772028	-0.0213747	0.924261	0.900609	0.0236517
cg04620228	0.939739	0.921586	0.0181528	0.885327	0.913738	-0.0284106	0.91478	0.918335	-0.00355426	0.928021	0.933594	-0.00557265
cg04621904	0.342008	0.346237	-0.00422952	0.411872	0.398351	0.0135205	0.469988	0.488481	-0.0184937	0.374528	0.335892	0.0386363
cg04625493	0.675485	0.64327	0.0322152	0.690291	0.697915	-0.00762426	0.862053	0.870987	-0.00893321	0.665775	0.648522	0.0172526
cg04625528	0.0675281	0.0634952	0.00403293	0.0895646	0.0610441	0.0285205	0.452461	0.437566	0.0148948	0.645599	0.640581	0.00501769
cg04626171	0.452576	0.457684	-0.0051088	0.433601	0.466683	-0.0330824	0.624522	0.633516	-0.00899408	0.420598	0.445258	-0.0246603
cg04630982	0.810553	0.817394	-0.00684024	0.515501	0.499491	0.0160095	0.5136	0.517632	-0.00403254	0.496086	0.501351	-0.00526463
cg04636194	0.851058	0.859352	-0.00829429	0.796915	0.78788	0.00903524	0.842599	0.833492	0.00910769	0.82014	0.827242	-0.00710228
cg04637219	0.527569	0.525627	0.00194191	0.775147	0.767217	0.0079302	0.153521	0.119849	0.0336725	0.695859	0.701506	-0.00564732
cg04637490	0.428527	0.432643	-0.00411627	0.703904	0.715366	-0.0114623	0.218911	0.227421	-0.00851044	0.663125	0.671552	-0.00842719
cg04640677	0.0373559	0.0436805	-0.00632459	0.0483519	0.0450538	0.00329815	0.0887289	0.0413478	0.0473811	0.0440369	0.0485157	-0.00447881
cg04641663	0.895904	0.896045	-0.000141578	0.844133	0.889087	-0.0449541	0.897025	0.9084	-0.011375	0.880787	0.856794	0.0239927
cg04642759	0.422359	0.415732	0.00662766	0.473383	0.45608	0.0173028	0.252304	0.24589	0.0064142	0.228577	0.219267	0.0093095
cg04644844	0.716893	0.717785	-0.000891407	0.771333	0.778648	-0.00731495	0.464021	0.485198	-0.021177	0.732765	0.737361	-0.00459617
cg04646860	0.558115	0.548969	0.00914608	0.0684834	0.0516318	0.0168516	0.171188	0.172367	-0.00117962	0.751909	0.736912	0.0149965
cg04653083	0.0508934	0.0657359	-0.0148424	0.0465811	0.065681	-0.0190999	0.644481	0.689849	-0.0453674	0.506275	0.493627	0.0126486
cg04659622	0.0431696	0.0457229	-0.00255327	0.490027	0.497518	-0.00749025	0.280661	0.267853	0.0128074	0.0466174	0.0383949	0.0082226
cg04663649	0.515332	0.524286	-0.00895425	0.202804	0.193298	0.00950553	0.275852	0.309341	-0.0334893	0.496296	0.539347	-0.0430516
cg04669465	0.629465	0.618386	0.0110794	0.728907	0.750509	-0.0216018	0.620671	0.618909	0.00176126	0.768339	0.753664	0.0146756
cg04675170	0.172562	0.18753	-0.0149682	0.260018	0.253081	0.00693679	0.607971	0.608648	-0.000677162	0.444402	0.448239	-0.00383754
cg04675306	0.549494	0.586666	-0.0371721	0.250376	0.242618	0.00775804	0.726693	0.733523	-0.0068301	0.564283	0.567132	-0.00284973
cg04677508	0.0990834	0.11394	-0.0148571	0.123342	0.116868	0.00647426	0.168117	0.136183	0.0319331	0.0803384	0.0895271	-0.00918866
cg04688327	0.817957	0.799175	0.0187819	0.842599	0.826336	0.0162636	0.587377	0.58383	0.00354736	0.831014	0.850224	-0.0192093
cg04688815	0.632702	0.647705	-0.0150028	0.614589	0.594258	0.0203319	0.679097	0.617181	0.0619162	0.593323	0.562874	0.0304495
cg04690567	0.148844	0.154859	-0.00601523	0.10284	0.088926	0.013914	0.420146	0.428323	-0.00817712	0.478279	0.466905	0.0113738
cg04696059	0.687222	0.688668	-0.0014458	0.892573	0.900051	-0.0074776	0.807876	0.8094	-0.00152385	0.904328	0.906496	-0.00216745
cg04697849	0.945856	0.937922	0.00793402	0.956779	0.938229	0.0185496	0.921592	0.9268	-0.00520818	0.921925	0.910184	0.0117416
cg04700811	0.835791	0.818035	0.0177559	0.817907	0.81235	0.00555763	0.49951	0.509843	-0.0103337	0.828325	0.807508	0.0208174
cg04702368	0.859066	0.843264	0.0158023	0.799972	0.788954	0.0110172	0.723104	0.700179	0.0229247	0.808771	0.799053	0.00971825
cg04704683	0.0561542	0.0621193	-0.00596503	0.103692	0.0956275	0.00806412	0.0766549	0.08015	-0.00349512	0.0443307	0.0507083	-0.00637767
cg04721883	0.49316	0.508492	-0.0153318	0.470221	0.445327	0.0248938	0.567449	0.589814	-0.0223644	0.508542	0.524994	-0.0164522
cg04730443	0.0325605	0.0342059	-0.00164541	0.0240889	0.0316012	-0.0075123	0.0254872	0.0258171	-0.000329878	0.0467775	0.0599757	-0.0131983
cg04733222	0.562043	0.588702	-0.026659	0.380191	0.352269	0.0279225	0.662679	0.635631	0.0270474	0.712215	0.70874	0.00347467
cg04734446	0.794932	0.77052	0.0244127	0.787603	0.786216	0.00138617	0.563477	0.550874	0.0126035	0.662055	0.678914	-0.0168584
cg04735237	0.778005	0.767859	0.0101458	0.732841	0.740397	-0.00755508	0.505621	0.518804	-0.0131832	0.677954	0.70295	-0.024996
cg04738169	0.0552481	0.0591543	-0.00390613	0.0786738	0.0659531	0.0127206	0.0825309	0.0439762	0.0385548	0.0553802	0.0445754	0.0108048
cg04739874	0.45836	0.472059	-0.013699	0.507179	0.502333	0.00484626	0.59199	0.655588	-0.063598	0.483704	0.495346	-0.0116418
cg04740028	0.350697	0.321112	0.0295853	0.12474	0.122089	0.00265102	0.385733	0.401908	-0.0161745	0.0968814	0.0992611	-0.00237964
cg04743474	0.073247	0.0739783	-0.000731265	0.0345964	0.048283	-0.0136866	0.524533	0.497271	0.0272623	0.0703601	0.0743008	-0.00394066
cg04745408	0.399607	0.43226	-0.032653	0.464926	0.469269	-0.0043427	0.328708	0.331248	-0.00254004	0.397115	0.435454	-0.0383394
cg04745934	0.894448	0.895285	-0.000836772	0.848873	0.848225	0.000647784	0.890014	0.890709	-0.000694923	0.889872	0.892181	-0.00230841
cg04746792	0.408099	0.425305	-0.0172053	0.509453	0.511288	-0.00183476	0.583147	0.545715	0.0374321	0.432524	0.441697	-0.00917381
cg04751297	0.479941	0.495125	-0.0151841	0.490148	0.463161	0.0269867	0.471804	0.471335	0.000468495	0.689308	0.674483	0.0148255
cg04751886	0.904852	0.926961	-0.0221093	0.676011	0.667408	0.00860274	0.910764	0.90959	0.00117376	0.688544	0.677157	0.0113873
cg04754076	0.604572	0.646526	-0.0419537	0.587884	0.618963	-0.0310796	0.763943	0.770927	-0.00698317	0.595302	0.617591	-0.0222897
cg04755662	0.729427	0.746083	-0.0166559	0.772921	0.752404	0.0205169	0.532632	0.546641	-0.0140085	0.737077	0.782719	-0.0456425
cg04762552	0.0549627	0.0455466	0.00941611	0.0576119	0.0382142	0.0193977	0.0624405	0.0419695	0.020471	0.0444206	0.0584149	-0.0139943
cg04768312	0.0748446	0.0859353	-0.0110906	0.121768	0.0934827	0.0282848	0.42337	0.455632	-0.032262	0.0794165	0.0650351	0.0143814
cg04768884	0.287118	0.242406	0.044712	0.0582987	0.0824415	-0.0241428	0.109467	0.12645	-0.0169823	0.494702	0.49151	0.00319198
cg04769268	0.472528	0.477896	-0.00536798	0.262277	0.272229	-0.00995185	0.504286	0.508232	-0.00394617	0.471915	0.492434	-0.0205188
cg04769341	0.529915	0.552401	-0.022486	0.35659	0.350767	0.00582316	0.196322	0.194066	0.00225653	0.524542	0.522397	0.00214528
cg04769935	0.399946	0.387399	0.0125468	0.658718	0.671676	-0.0129586	0.374924	0.384223	-0.00929963	0.425825	0.443543	-0.0177181
cg04772362	0.399347	0.373605	0.0257419	0.71487	0.720641	-0.00577045	0.512981	0.53191	-0.0189292	0.46518	0.476196	-0.0110163
cg04774951	0.0290008	0.0332243	-0.00422355	0.0439099	0.0890355	-0.0451256	0.0240889	0.0258823	-0.00179341	0.0456756	0.0370869	0.00858874
cg04777103	0.0829689	0.0703125	0.0126564	0.0749535	0.103676	-0.0287229	0.142465	0.154929	-0.0124645	0.0708397	0.0703044	0.00053533
cg04777541	0.224859	0.216473	0.00838528	0.451831	0.453522	-0.00169117	0.0853313	0.0641145	0.0212169	0.17305	0.179386	-0.00633583
cg04778337	0.880687	0.892081	-0.0113944	0.834425	0.854193	-0.0197682	0.537444	0.541411	-0.00396679	0.904174	0.838944	0.0652296
cg04782269	0.292388	0.304305	-0.0119177	0.198109	0.19232	0.00578869	0.0581912	0.0513782	0.00681306	0.234491	0.230956	0.00353587
cg04787237	0.578763	0.57224	0.0065236	0.582691	NA	NA	0.690291	0.694657	-0.00436559	0.595203	0.59549	-0.00028723
cg04790097	0.669651	0.67691	-0.00725849	0.772146	0.788601	-0.0164546	0.725806	0.661779	0.064027	0.789979	0.761194	0.0287849
cg04790137	0.767932	0.759997	0.0079351	0.734836	0.74265	-0.00781341	0.522023	0.515698	0.00632442	0.731694	0.731627	6.64604e-05
cg04790148	0.56608	0.53252	0.0335599	0.931408	0.930893	0.000515241	0.619828	0.607601	0.0122273	0.473274	0.446177	0.027097
cg04791287	0.425144	0.41139	0.0137547	0.388274	0.422558	-0.0342844	0.413258	0.420793	-0.00753552	0.068707	0.0713951	-0.00268811
cg04811556	0.513058	0.514804	-0.00174597	0.570576	0.529382	0.0411937	0.69872	0.645303	0.053417	0.496357	0.516262	-0.0199054
cg04812084	0.2633	0.242808	0.0204928	0.0426012	0.0485684	-0.00596719	0.0454974	0.0532341	-0.00773667	0.0789415	0.0790979	-0.000156438
cg04812249	0.41218	0.390165	0.0220146	0.395297	0.419985	-0.0246888	0.546899	0.547094	-0.000195005	0.568518	0.556064	0.0124539
cg04813240	0.837408	0.864535	-0.0271266	0.477686	0.516006	-0.03832	0.663759	0.630817	0.0329416	0.875594	0.873205	0.00238908
cg04814085	0.557738	0.569876	-0.0121384	0.119897	0.132212	-0.0123149	0.685583	0.658357	0.0272264	0.515835	0.557776	-0.0419406
cg04820200	0.036832	0.0207775	0.0160544	0.0394224	0.0614613	-0.0220389	0.0518139	0.054684	-0.00287014	0.0318315	0.0601897	-0.0283582
cg04821008	0.965112	0.945017	0.0200952	0.948103	0.961803	-0.0136992	0.959439	0.953265	0.00617423	0.958613	0.955381	0.00323169
cg04822167	0.783938	0.819532	-0.0355946	0.813244	0.83576	-0.0225154	0.769857	0.801031	-0.0311744	0.774508	0.770558	0.00394975
cg04823894	0.194176	0.192251	0.00192444	0.129784	0.158839	-0.0290551	0.564076	0.563522	0.000553919	0.245045	0.235845	0.00919998
cg04843340	0.0313545	0.0419834	-0.0106289	0.0536218	0.0445579	0.00906385	0.0618377	0.0618327	5.02569e-06	0.0488561	0.0501995	-0.00134335
cg04853367	0.698507	0.679831	0.0186763	0.722925	0.68507	0.0378548	0.46206	0.464186	-0.00212635	0.480033	0.497853	-0.01782
cg04854285	0.236424	0.228021	0.00840366	0.124526	0.140146	-0.0156207	0.177046	0.179557	-0.00251022	0.128958	0.113676	0.0152825
cg04855291	0.542348	0.582796	-0.040448	0.521228	0.481324	0.0399047	0.559548	0.598415	-0.0388675	0.68952	0.67738	0.0121398
cg04856605	0.190567	0.244195	-0.0536289	0.493471	0.52178	-0.0283084	0.722521	0.755415	-0.0328944	0.516571	0.522855	-0.00628377
cg04860194	0.659552	0.687035	-0.0274826	0.813125	0.801943	0.011182	0.604252	0.575995	0.0282567	0.663372	0.646128	0.0172442
cg04861259	0.484394	0.499192	-0.0147979	0.640909	0.636222	0.00468751	0.400195	0.423354	-0.0231586	0.48043	0.444756	0.0356741
cg04882894	0.244104	0.240348	0.00375559	0.326271	0.327452	-0.00118106	0.115218	0.131282	-0.0160636	0.0626327	0.0543631	0.00826957
cg04886514	0.53733	0.531174	0.00615546	0.277465	0.290124	-0.0126599	0.636981	0.629076	0.0079049	0.550916	0.580242	-0.0293257
cg04886769	0.0764902	0.0741946	0.00229563	0.0648606	0.0736718	-0.00881125	0.0385257	0.0375683	0.000957343	0.149149	0.137688	0.0114613
cg04889508	0.457039	0.45696	7.94769e-05	0.0797543	0.0935708	-0.0138165	0.153392	0.108388	0.0450037	0.402434	0.468061	-0.0656263
cg04907664	0.619789	0.646348	-0.0265589	0.588384	0.521707	0.0666762	0.810851	0.797867	0.0129844	0.606433	0.624307	-0.0178734
cg04918728	0.0980036	0.108896	-0.0108926	0.22892	0.235222	-0.00630262	0.363048	0.376841	-0.0137929	0.166397	0.177808	-0.011411
cg04919858	0.0411845	0.0524028	-0.0112184	0.480523	0.501351	-0.0208281	0.0684834	0.104525	-0.0360414	0.0788431	0.0717347	0.00710834
cg04920616	0.854889	0.872687	-0.0177977	0.603144	0.607752	-0.00460761	0.451938	0.445149	0.00678991	0.849541	0.872552	-0.0230117
cg04924696	0.294509	0.332464	-0.0379543	0.597799	0.607265	-0.0094662	0.7431	0.729689	0.0134106	0.560075	0.564021	-0.00394563
cg04924962	0.343045	0.341927	0.00111793	0.580017	0.588402	-0.00838456	0.505727	0.516024	-0.0102967	0.589945	0.569905	0.02004
cg04926827	0.716092	0.709722	0.00637041	0.676764	0.674931	0.0018336	0.806438	0.826389	-0.0199513	0.534583	0.518936	0.0156472
cg04927540	0.066957	0.0670637	-0.000106701	0.107219	0.0994251	0.00779366	0.20081	0.188428	0.0123823	0.260669	0.232775	0.0278947
cg04929015	0.176913	0.154717	0.0221953	0.0607297	0.053775	0.0069547	0.0397	0.0599683	-0.0202683	0.0529981	0.0584861	-0.00548803
cg04929022	0.0934667	0.0932465	0.00022013	0.374924	0.349	0.0259233	0.093447	0.0587004	0.0347466	0.263792	0.228882	0.0349098
cg04929599	0.20566	0.211134	-0.00547358	0.586725	0.609342	-0.0226165	0.528041	0.545055	-0.017014	0.554632	0.60809	-0.0534575
cg04929865	0.154191	0.150707	0.0034838	0.342373	0.351435	-0.00906146	0.123733	0.100438	0.0232954	0.184961	0.17961	0.0053504
cg04930858	0.549878	0.492302	0.0575754	0.839806	0.798076	0.0417302	0.865116	0.851405	0.0137105	0.471071	0.513409	-0.0423379
cg04932149	0.0475304	0.0545758	-0.00704541	0.0773087	0.101614	-0.0243053	0.0956357	0.101262	-0.0056259	0.0679725	0.0741111	-0.00613859
cg04932755	0.0187181	0.0202163	-0.00149822	0.0835225	0.0638127	0.0197098	0.0209992	0.0220272	-0.00102799	0.0187176	0.0186576	6.00434e-05
cg04941611	0.697203	0.699043	-0.00184013	0.468244	0.447906	0.020338	0.771333	0.782417	-0.011084	0.480941	0.452918	0.0280229
cg04944936	0.378076	0.395541	-0.017465	0.447554	0.455152	-0.00759755	0.526034	0.531781	-0.00574679	0.252957	0.251984	0.000973003
cg04950711	0.459507	0.470714	-0.0112075	0.733851	0.740251	-0.00639949	0.53327	0.533836	-0.000565661	0.68033	0.687765	-0.00743455
cg04960964	0.594584	0.570547	0.0240365	0.552273	0.568649	-0.0163766	0.728798	0.728672	0.000125774	0.593557	0.581273	0.0122839
cg04964672	0.551444	0.549247	0.00219703	0.70123	0.717368	-0.0161381	0.308241	0.345986	-0.0377454	0.523722	0.589418	-0.0656958
cg04985372	0.626384	0.655112	-0.0287286	0.69806	0.699335	-0.00127544	0.161631	0.214569	-0.0529374	0.689433	0.696542	-0.00710871
cg04995154	0.382604	0.414311	-0.031707	0.406609	0.411723	-0.00511389	0.301269	0.282538	0.0187314	0.0986541	0.0909054	0.00774873
cg05012785	0.0492836	0.0522357	-0.0029521	0.109467	0.0725665	0.0369008	0.107891	0.117583	-0.00969182	0.0569685	0.0466236	0.010345
cg05016192	0.502565	0.47688	0.0256854	0.179639	0.18272	-0.00308057	0.565033	0.562482	0.00255017	0.459239	0.428034	0.0312045
cg05019001	0.310932	0.317518	-0.00658616	0.226053	0.224597	0.00145638	0.378963	0.369428	0.00953536	0.287641	0.263854	0.0237869
cg05026884	0.215587	0.244346	-0.0287587	0.257152	0.259827	-0.00267533	0.388925	0.371225	0.0176995	0.589081	0.521565	0.0675156
cg05034175	0.558194	0.582159	-0.0239654	0.531507	0.548987	-0.0174799	0.747887	0.73508	0.0128074	0.637445	0.655999	-0.0185539
cg05039054	0.0607248	0.0638207	-0.00309593	0.107586	0.0560337	0.0515524	0.0445057	0.0745991	-0.0300934	0.163318	0.173812	-0.0104943
cg05039749	0.0312516	0.0379438	-0.00669223	0.112822	0.0972844	0.0155375	0.0617902	0.101138	-0.0393481	0.0501757	0.0316012	0.0185745
cg05040675	0.816806	0.794961	0.0218452	0.629229	0.559062	0.070167	0.480987	0.473485	0.00750174	0.8967	0.89942	-0.0027202
cg05041728	0.595111	0.594548	0.000563052	0.614262	0.636009	-0.0217468	0.397302	0.395423	0.00187844	0.606681	0.638155	-0.031474
cg05045659	0.547342	0.584587	-0.0372449	0.120179	0.0967606	0.0234185	0.141302	0.18209	-0.0407879	0.64436	0.636222	0.00813799
cg05047411	0.140782	0.134348	0.00643481	0.21871	0.194778	0.0239314	0.104586	0.111032	-0.00644626	0.290118	0.305786	-0.0156688
cg05047811	0.402709	0.382033	0.0206759	0.153283	0.122453	0.0308295	0.410016	0.423074	-0.0130577	0.348883	0.364068	-0.0151855
cg05049933	0.179127	0.182644	-0.00351685	0.211852	0.193595	0.0182566	0.451403	0.470955	-0.0195522	0.141226	0.126838	0.0143884
cg05052243	0.378484	0.371971	0.00651271	0.338241	0.342569	-0.00432806	0.40731	0.409843	-0.0025337	0.549029	0.476328	0.0727012
cg05059994	0.0545026	0.0529236	0.00157893	0.0745776	0.0748293	-0.000251685	0.101177	0.0827673	0.0184099	0.0692339	0.0610441	0.00818978
cg05061296	0.0515183	0.0396595	0.0118588	0.0634897	0.0539196	0.00957014	0.0756491	0.0303935	0.0452556	0.427586	0.433833	-0.00624742
cg05061650	0.486762	0.507884	-0.0211226	0.16036	0.154281	0.00607827	0.465087	0.448491	0.0165952	0.145828	0.147594	-0.00176609
cg05065576	0.594983	0.624663	-0.0296801	0.590578	0.551728	0.0388496	0.502643	0.480393	0.0222496	0.630474	0.631865	-0.00139062
cg05071823	0.58525	0.556317	0.0289324	0.0480572	0.0423518	0.00570541	0.46607	0.466739	-0.000669594	0.548969	0.533943	0.0150255
cg05073171	0.101154	0.0989898	0.00216445	0.318535	0.3298	-0.0112657	0.280434	0.287236	-0.00680256	0.231199	0.242863	-0.0116641
cg05074623	0.13299	0.125111	0.00787908	0.231338	0.206427	0.024911	0.208562	0.219205	-0.0106428	0.133324	0.115773	0.0175508
cg05078558	0.345826	0.346048	-0.00022207	0.138274	0.135841	0.00243372	0.355587	0.34395	0.011637	0.0600305	0.0683126	-0.00828218
cg05078775	0.504935	0.468472	0.0364635	0.246173	0.277941	-0.0317683	0.581971	0.594657	-0.012686	0.394019	0.390775	0.00324414
cg05080834	0.0915318	0.0970207	-0.00548893	0.0265703	0.0640268	-0.0374565	0.0461691	0.0536347	-0.0074656	0.439423	0.44394	-0.00451693
cg05083020	0.195451	0.203154	-0.00770302	0.476091	0.460148	0.0159424	0.172013	0.217381	-0.0453676	0.419246	0.434898	-0.0156527
cg05085049	0.515852	0.506168	0.00968332	0.212692	0.221677	-0.00898433	0.284834	0.296655	-0.0118216	0.171092	0.162859	0.00823317
cg05088006	0.579057	0.510786	0.0682706	0.610815	0.623087	-0.0122723	0.280828	0.266007	0.0148213	0.34496	0.350767	-0.00580669
cg05093881	0.635581	0.627786	0.00779528	0.708438	0.726518	-0.0180805	0.466547	0.455342	0.0112055	0.577813	0.552002	0.0258104
cg05093999	0.495982	0.527432	-0.0314491	0.695212	0.690151	0.00506021	0.684087	0.662635	0.0214514	0.118599	0.128047	-0.0094475
cg05100268	0.386731	0.359618	0.0271133	0.400771	0.408664	-0.00789259	0.498967	0.516571	-0.0176038	0.43686	0.443473	-0.00661282
cg05100479	0.111882	0.113794	-0.00191176	0.158203	0.154129	0.00407382	0.19343	0.221955	-0.0285253	0.218422	0.196824	0.021598
cg05101765	0.75117	0.724791	0.0263785	0.766513	0.762879	0.00363412	0.62896	0.623458	0.005502	0.773208	0.796129	-0.022921
cg05103731	0.358765	0.374182	-0.0154162	0.0995891	0.0871973	0.0123918	0.142743	0.149999	-0.00725666	0.0764729	0.0708131	0.00565976
cg05105069	0.410585	0.419632	-0.00904719	0.151338	0.148566	0.00277213	0.0692653	0.0765036	-0.00723829	0.0342037	0.0407935	-0.00658982
cg05106463	0.0298418	0.0370902	-0.00724831	0.0344537	0.0401808	-0.00572711	0.0368153	0.069796	-0.0329807	0.0363128	0.0375172	-0.00120436
cg05106824	0.765403	0.771736	-0.0063331	0.550864	0.563465	-0.0126012	0.706357	0.712439	-0.0060824	0.213647	0.187262	0.0263857
cg05114100	0.83955	0.862412	-0.0228621	0.954025	0.952532	0.00149238	0.82452	0.829386	-0.00486637	0.459822	0.464183	-0.00436112
cg05116452	0.903066	0.892727	0.0103388	0.863931	0.894851	-0.0309205	0.900607	0.8947	0.00590738	0.895672	0.915665	-0.0199938
cg05116966	0.568168	0.561338	0.00683006	0.580543	0.587561	-0.00701828	0.852871	0.85364	-0.000768556	0.471653	0.510036	-0.0383833
cg05121989	0.371242	0.33977	0.0314718	0.395864	0.402175	-0.00631113	0.159668	0.17305	-0.0133821	0.673144	0.686942	-0.0137974
cg05127037	0.647545	0.599359	0.0481867	0.527128	0.563535	-0.0364065	0.418008	0.419276	-0.00126766	0.554157	0.514116	0.0400413
cg05127178	0.0803327	0.082717	-0.0023843	0.0351542	0.0477385	-0.0125843	0.0607985	0.0779883	-0.0171898	0.0581701	0.0611353	-0.00296522
cg05129588	0.636421	0.628595	0.00782651	0.508521	0.454463	0.0540575	0.412148	0.402868	0.00928028	0.619819	0.597701	0.022118
cg05130312	0.360599	0.359466	0.00113308	0.413258	0.424519	-0.0112616	0.431108	0.45424	-0.0231319	0.414241	0.42385	-0.00960927
cg05131629	0.0313718	0.0281973	0.00317449	0.0332228	0.0413157	-0.00809293	0.0386337	0.0376889	0.000944713	0.0524836	0.0599158	-0.0074322
cg05135729	0.656141	0.632979	0.0231626	0.693784	0.70605	-0.0122653	0.529077	0.522203	0.00687304	0.606133	0.620797	-0.0146638
cg05135828	0.602121	0.64817	-0.0460483	0.890014	0.880234	0.00978013	0.74263	0.78605	-0.0434199	0.708361	0.676381	0.0319793
cg05138704	0.815497	0.833294	-0.0177978	0.926473	0.919233	0.00724	0.857089	0.866437	-0.00934858	0.583548	0.588217	-0.00466842
cg05141400	0.378598	NA	NA	0.135421	0.122245	0.013176	0.707283	0.697175	0.0101071	0.074894	0.0695499	0.0053441
cg05147330	0.884425	0.838489	0.0459366	0.662393	0.569798	0.0925943	0.851196	0.845166	0.00602963	0.848785	0.813261	0.035524
cg05148324	0.860911	0.83615	0.0247612	0.770871	0.7881	-0.0172292	0.851923	0.832998	0.0189247	0.839362	0.79739	0.0419719
cg05151505	0.586458	0.513952	0.072506	0.493758	0.546998	-0.0532398	0.422603	0.444402	-0.0217987	0.55638	0.481035	0.0753457
cg05152051	0.0939671	0.0815116	0.0124555	0.280756	0.285396	-0.00464005	0.210926	0.173718	0.0372085	0.0924112	0.0883746	0.00403665
cg05153913	0.487639	0.491101	-0.00346141	0.132243	0.153091	-0.0208481	0.191443	0.194183	-0.00274005	0.090839	0.0916624	-0.000823435
cg05155058	0.0638423	0.055636	0.00820632	0.0955653	0.0690117	0.0265535	0.0811624	0.054357	0.0268054	0.0508097	0.0410957	0.00971402
cg05157702	0.514794	0.511762	0.00303233	0.462949	0.449577	0.0133721	0.367874	0.38492	-0.0170461	0.612925	0.639755	-0.0268303
cg05158109	0.50803	0.511854	-0.00382393	0.860573	0.874341	-0.0137686	0.904159	0.911065	-0.00690616	0.806519	0.81724	-0.0107202
cg05162528	0.648132	0.651343	-0.00321034	0.739415	0.737176	0.00223902	0.582996	0.594956	-0.01196	0.470809	0.491998	-0.0211887
cg05168419	0.623766	0.617496	0.0062708	0.792135	0.822296	-0.030161	0.484249	0.469894	0.0143549	0.749079	0.761537	-0.0124586
cg05169062	0.626505	0.610536	0.0159695	0.484791	0.48348	0.00131088	0.0915709	0.086707	0.00486392	0.680972	0.66632	0.0146527
cg05175213	0.590023	0.603379	-0.0133554	0.841409	0.838396	0.00301297	0.640054	0.584252	0.0558021	0.794695	0.811023	-0.0163276
cg05177544	0.104554	0.0998616	0.00469277	0.0758187	0.0706437	0.00517499	0.103996	0.0667513	0.0372451	0.0480191	0.0717959	-0.0237768
cg05184076	0.52318	0.489278	0.0339019	0.504342	0.504804	-0.000461354	0.728294	0.706694	0.0216	0.516376	0.534982	-0.0186061
cg05185776	0.503849	0.483245	0.0206034	0.454231	0.479572	-0.0253411	0.62816	0.623014	0.00514621	0.473355	0.46655	0.00680507
cg05190516	0.423126	0.424286	-0.00116046	0.461346	0.413849	0.0474969	0.634084	0.606804	0.0272796	0.266007	0.285892	-0.0198852
cg05190630	0.0626136	0.0635494	-0.000935786	0.182603	0.200136	-0.0175333	0.0821173	0.0963921	-0.0142749	0.0540868	0.0472117	0.00687502
cg05193067	0.0332319	0.0337299	-0.000497962	0.0360708	0.0396817	-0.0036109	0.0434911	0.0308672	0.0126239	0.0404549	0.0234498	0.0170052
cg05193141	0.690537	0.67111	0.0194264	0.534385	0.457352	0.0770332	0.438044	0.437845	0.000199146	0.514826	0.55134	-0.0365147
cg05195686	0.802603	0.764452	0.0381505	0.813921	0.847027	-0.0331064	0.258413	0.263792	-0.00537859	0.632242	0.618329	0.013913
cg05196026	0.528166	0.539301	-0.0111348	0.539924	0.527859	0.0120647	0.719195	0.683335	0.0358601	0.255976	0.244414	0.0115618
cg05196885	0.756398	0.799597	-0.0431997	0.771867	0.768591	0.00327626	0.517274	0.518916	-0.00164208	0.788162	0.804265	-0.0161028
cg05204037	0.526709	0.497919	0.0287903	0.482858	0.494584	-0.0117256	0.610815	0.610798	1.70479e-05	0.406022	0.424901	-0.0188783
cg05206587	0.139189	0.157919	-0.0187301	0.897891	0.894514	0.00337749	0.488409	0.507947	-0.0195385	0.0592737	0.0629337	-0.00365994
cg05215598	0.784335	0.829517	-0.0451817	0.788765	0.797958	-0.009193	0.834319	0.839267	-0.00494748	0.8155	0.777824	0.0376767
cg05219621	0.374445	0.392108	-0.0176622	0.460058	0.449233	0.0108246	0.333272	0.345322	-0.0120497	0.295141	0.297123	-0.00198264
cg05223249	0.399463	0.378512	0.0209509	0.419056	0.399596	0.0194595	0.107219	0.106756	0.000462792	0.379266	0.373713	0.00555263
cg05237470	0.893463	0.892569	0.000894107	0.878284	0.888125	-0.00984094	0.89716	0.898063	-0.000903294	0.88563	0.886917	-0.00128649
cg05237609	0.130324	0.147779	-0.0174549	0.482419	0.488794	-0.00637514	0.581871	0.621031	-0.0391606	0.443402	0.493548	-0.0501469
cg05237970	0.214742	0.242076	-0.0273344	0.476918	0.486219	-0.00930178	0.44378	0.488545	-0.0447645	0.462913	0.503104	-0.0401907
cg05239680	0.515254	0.524554	-0.00930007	0.240283	0.245986	-0.00570273	0.793079	0.813053	-0.0199746	0.492834	0.535049	-0.0422149
cg05239824	0.642889	0.630201	0.0126877	0.6236	0.595519	0.0280812	0.497601	0.505545	-0.00794398	0.866437	0.881239	-0.0148016
cg05240059	0.381343	0.356459	0.0248846	0.423752	0.40073	0.0230225	0.16181	0.138629	0.0231803	0.0769973	0.0540941	0.0229032
cg05240083	0.814224	0.753954	0.0602708	0.439195	0.523384	-0.0841889	0.526147	0.51147	0.0146766	0.769922	0.767174	0.00274774
cg05245722	0.0372882	0.0415195	-0.00423133	0.103309	0.0901854	0.0131239	0.350999	0.365049	-0.01405	0.0404109	0.0438351	-0.00342422
cg05254049	0.690806	0.692738	-0.00193253	0.555168	0.537598	0.0175698	0.86672	0.869978	-0.00325771	0.489722	0.483286	0.00643684
cg05257947	0.664214	0.666248	-0.00203413	0.623181	0.657425	-0.0342442	0.822274	0.812722	0.00955219	0.597971	0.627696	-0.0297254
cg05259868	0.53041	0.528592	0.00181857	0.823852	0.877824	-0.0539717	0.850964	0.84431	0.00665394	0.525343	0.541614	-0.0162716
cg05260852	0.386856	0.427125	-0.0402694	0.603913	0.579405	0.0245077	0.774421	0.811671	-0.0372495	0.343688	0.337821	0.00586694
cg05264033	0.0926908	0.0971207	-0.00442989	0.393239	0.364181	0.0290575	0.269476	0.272568	-0.00309119	0.187557	0.193831	-0.00627411
cg05272837	0.48916	0.47266	0.0164998	0.204105	0.227126	-0.0230212	0.560279	0.562241	-0.0019619	0.452565	0.421105	0.03146
cg05275343	0.403744	0.407111	-0.00336688	0.398525	0.406574	-0.0080498	0.625961	0.604962	0.0209987	0.387811	0.374038	0.0137731
cg05279113	0.431277	0.438401	-0.0071241	0.437583	0.435596	0.00198641	0.589898	0.588854	0.00104442	0.424912	0.450945	-0.0260329
cg05280762	0.0219865	0.0307111	-0.00872459	0.030209	0.0220804	0.00812862	0.0219811	0.0476919	-0.0257108	0.026566	0.0224681	0.00409791
cg05283871	0.939469	0.958606	-0.0191369	0.932042	0.923424	0.00861837	0.950286	0.970961	-0.0206745	0.956073	0.933099	0.0229744
cg05287266	0.671238	0.658359	0.0128793	0.709938	0.715753	-0.00581468	0.622565	0.607073	0.0154922	0.766273	0.729319	0.036954
cg05288642	0.497901	0.453588	0.0443127	0.476427	0.507207	-0.0307805	0.658542	0.634056	0.024486	0.499956	0.488433	0.0115233
cg05288740	0.498639	0.520037	-0.0213984	0.169269	0.192676	-0.0234064	0.115614	0.151171	-0.0355567	0.655278	0.648096	0.0071827
cg05290899	0.283275	0.288527	-0.00525237	0.511882	0.502981	0.00890072	0.389698	0.382882	0.00681601	0.49908	0.514228	-0.0151477
cg05294909	0.648485	0.657039	-0.00855394	0.671646	0.649221	0.0224251	0.346177	0.327345	0.018832	0.633378	0.644408	-0.01103
cg05295197	0.832329	0.836484	-0.00415474	0.8087	0.820102	-0.0114018	0.83176	0.845904	-0.0141437	0.877668	0.870481	0.00718656
cg05295417	0.294357	0.317724	-0.0233669	0.277652	0.278312	-0.000660029	0.55775	0.532985	0.0247652	0.318192	0.304809	0.0133837
cg05295688	0.772933	0.773294	-0.000360998	0.791478	0.802826	-0.0113481	0.250575	0.226682	0.0238926	0.794499	0.779158	0.0153405
cg05302110	0.0630696	0.063417	-0.000347411	0.08313	0.0958654	-0.0127354	0.184388	0.17863	0.00575862	0.0544299	0.0636765	-0.0092466
cg05302212	0.416198	0.408203	0.00799531	0.413365	0.454094	-0.040729	0.602813	0.607852	-0.00503893	0.415594	0.436033	-0.0204384
cg05305702	0.16279	0.167947	-0.00515678	0.357253	0.346855	0.0103977	0.156231	0.173768	-0.0175365	0.289005	0.318941	-0.0299365
cg05305760	0.481857	0.470135	0.0117215	0.571169	0.612749	-0.0415799	0.726156	0.754654	-0.028498	0.520838	0.541805	-0.0209671
cg05307865	0.799343	0.81298	-0.0136364	0.821896	0.811981	0.00991496	0.902549	0.908592	-0.00604271	0.4997	0.516855	-0.0171546
cg05313317	0.412689	0.420173	-0.00748448	0.553911	0.517443	0.036468	0.2405	0.224313	0.0161869	0.450451	0.493861	-0.0434096
cg05313921	0.385423	0.37437	0.0110534	0.375401	0.374038	0.00136305	0.365398	0.36802	-0.00262241	0.595936	0.566299	0.0296367
cg05321038	0.743577	0.728342	0.0152359	0.800898	0.829996	-0.0290974	0.453464	0.445036	0.00842711	0.550316	0.529106	0.0212093
cg05322190	0.0923233	0.0851747	0.00714864	0.0744348	0.0523369	0.0220979	0.128756	0.167233	-0.0384766	0.267482	0.256611	0.0108705
cg05324686	0.90413	0.893721	0.0104098	0.529077	0.564021	-0.0349445	0.928925	0.902156	0.0267684	0.861868	0.899179	-0.0373112
cg05327750	0.134324	0.129344	0.00498005	0.128439	0.128047	0.000391784	0.443933	0.443084	0.000849455	0.0941878	0.0956275	-0.00143967
cg05335577	0.126485	0.125314	0.0011715	0.0658923	0.0634025	0.00248983	0.0822539	0.104212	-0.0219583	0.068377	0.0818357	-0.0134587
cg05339472	0.0323855	0.033848	-0.00146248	0.0522718	0.0457181	0.00655362	0.0624405	0.0631996	-0.000759073	0.0486833	0.03845	0.0102333
cg05345404	0.49705	0.479394	0.0176568	0.56481	0.587967	-0.0231568	0.28398	0.29246	-0.00848007	0.430091	0.440506	-0.0104142
cg05347431	0.450563	0.43519	0.0153729	0.540691	0.514541	0.0261494	0.268984	0.287987	-0.0190022	0.179557	0.167137	0.0124196
cg05356800	0.91629	0.919886	-0.0035957	0.885739	0.878123	0.0076164	0.84429	0.86199	-0.0177003	0.900938	0.90525	-0.00431156
cg05361475	0.450793	0.396154	0.0546385	0.323263	0.299737	0.0235267	0.0484932	0.0672252	-0.018732	0.595999	0.595826	0.000173039
cg05363666	0.31426	0.379626	-0.0653667	0.365398	0.393096	-0.0276983	0.556738	0.549728	0.00701004	0.305044	0.322045	-0.0170007
cg05365121	0.534912	0.540279	-0.00536735	0.530093	0.549917	-0.0198244	0.694907	0.722643	-0.0277358	0.527741	0.536369	-0.00862771
cg05375002	0.349648	0.343319	0.00632853	0.502121	0.422017	0.0801034	0.0400865	0.0331229	0.00696358	0.561476	0.570436	-0.00896046
cg05375065	0.151899	0.183689	-0.0317906	0.0980441	0.0808851	0.017159	0.122541	0.124576	-0.00203533	0.478725	0.559779	-0.081054
cg05376895	0.449046	0.41881	0.0302356	0.380004	0.381726	-0.00172219	0.34162	0.341624	-4.17255e-06	0.635346	0.621993	0.0133528
cg05392989	0.302824	0.31738	-0.0145558	0.431881	0.449499	-0.0176182	0.593842	0.590367	0.00347545	0.17791	0.158736	0.0191733
cg05396017	0.273296	0.19925	0.0740457	0.247782	0.209137	0.0386451	0.35423	0.354168	6.2346e-05	0.438024	0.445077	-0.00705248
cg05397738	0.85366	0.83384	0.0198201	0.878543	0.870062	0.00848136	0.857845	0.855229	0.00261668	0.634196	0.624002	0.010194
cg05397813	0.513793	0.511602	0.00219123	0.161131	0.186206	-0.0250749	0.563675	0.562076	0.00159934	0.870125	0.883299	-0.0131739
cg05397816	0.572513	0.591948	-0.0194346	0.318167	0.330743	-0.0125765	0.71465	0.718196	-0.00354606	0.502324	0.528573	-0.0262498
cg05397934	0.449116	0.450705	-0.00158884	0.498849	0.47465	0.0241992	0.430214	0.40689	0.0233239	0.450599	0.469891	-0.0192914
cg05400670	0.8725	0.862545	0.00995491	0.840432	0.853565	-0.0131335	0.864295	0.853294	0.0110005	0.771923	0.778648	-0.00672473
cg05407550	0.0789304	0.0725942	0.00633624	0.0322085	0.0448656	-0.0126571	0.0776199	0.0869513	-0.00933145	0.221955	0.233285	-0.0113296
cg05411980	0.23624	0.280714	-0.0444734	0.52282	0.509528	0.0132924	0.467761	0.482152	-0.0143909	0.64107	0.673244	-0.0321743
cg05414556	0.0503951	0.0437868	0.0066083	0.0610111	0.07818	-0.017169	0.103767	0.106102	-0.00233413	0.169144	0.150654	0.0184902
cg05418443	0.414861	0.402723	0.0121383	0.442222	0.446325	-0.00410229	0.543441	0.546436	-0.00299562	0.426006	0.440099	-0.0140931
cg05418506	0.359733	0.343106	0.0166274	0.424428	0.432583	-0.00815474	0.372487	0.376399	-0.00391159	0.445083	0.480817	-0.0357343
cg05418779	0.386256	0.369678	0.0165785	0.11834	0.0976367	0.0207029	0.143833	0.16799	-0.0241568	0.458108	0.411018	0.0470895
cg05419061	0.0253184	0.0348147	-0.00949629	0.0325445	0.0364062	-0.00386173	0.045195	0.0494017	-0.00420672	0.0282473	0.0391914	-0.0109441
cg05419227	0.404702	0.405851	-0.00114927	0.382894	0.416216	-0.0333225	0.370117	0.3652	0.00491688	0.336369	0.36128	-0.0249113
cg05423956	0.806011	0.744837	0.0611746	0.882228	0.91794	-0.0357122	0.319053	0.323127	-0.00407363	0.855229	0.89031	-0.0350813
cg05424366	0.198736	0.178354	0.0203821	0.10138	0.0978414	0.00353875	0.158203	0.144657	0.0135456	0.0916872	0.0856934	0.00599382
cg05434903	0.469836	0.492227	-0.0223917	0.485723	0.495517	-0.00979349	0.227985	0.223414	0.00457031	0.455156	0.443304	0.0118515
cg05435697	0.121222	0.169671	-0.0484495	0.568514	0.495121	0.0733932	0.185102	0.139101	0.0460016	0.221771	0.218863	0.00290748
cg05437059	0.555939	0.574408	-0.0184685	0.825657	0.811023	0.0146339	0.655865	0.619516	0.0363494	0.55342	0.581193	-0.0277724
cg05441864	0.532372	0.533643	-0.00127122	0.524569	0.583053	-0.0584843	0.663443	0.653872	0.0095717	0.519947	0.532682	-0.0127356
cg05444994	0.439067	0.422933	0.0161332	0.727212	0.753664	-0.0264522	0.580203	0.570408	0.00979508	0.302347	0.296782	0.00556541
cg05445588	0.444761	0.430315	0.014446	0.57414	0.542673	0.0314674	0.427395	0.436619	-0.00922356	0.0660041	0.0832128	-0.0172087
cg05446138	0.0440252	0.0570526	-0.0130274	0.286698	0.284785	0.00191322	0.117859	0.145622	-0.0277627	0.165431	0.143015	0.0224159
cg05448962	0.688656	0.734593	-0.0459369	0.738982	0.771125	-0.0321432	0.486671	0.487486	-0.000815112	0.605711	0.598726	0.00698555
cg05450314	0.869026	0.852288	0.0167385	0.728491	0.746604	-0.0181135	0.916329	0.898684	0.0176447	0.759392	0.757243	0.00214866
cg05453618	0.766523	0.7625	0.00402311	0.814164	0.833683	-0.0195186	0.497521	0.496357	0.00116385	0.802747	0.752757	0.0499902
cg05453733	0.874182	0.887841	-0.013659	0.874091	0.813028	0.0610626	0.873554	0.866267	0.00728644	0.819741	0.803377	0.0163636
cg05454990	0.804463	0.807477	-0.00301407	0.665797	0.667266	-0.00146927	0.827224	0.819741	0.00748291	0.898684	0.857891	0.0407927
cg05455393	0.84336	0.858392	-0.0150317	0.778895	0.79283	-0.0139352	0.845718	0.863268	-0.0175497	0.826986	0.828464	-0.00147797
cg05456652	0.670027	0.705821	-0.0357945	0.77238	0.778009	-0.00562862	0.7845	0.810377	-0.0258771	0.620435	0.649757	-0.0293221
cg05459616	0.734349	0.733966	0.000382233	0.767	0.744014	0.0229865	0.575399	0.591497	-0.0160983	0.542047	0.460853	0.0811943
cg05462236	0.0998116	0.0903447	0.00946688	0.266118	0.268395	-0.0022775	0.189774	0.162378	0.0273963	0.125552	0.115896	0.00965661
cg05463948	0.101601	0.0931265	0.00847402	0.0306384	0.0336004	-0.00296198	0.0212576	0.0245578	-0.00330023	0.213414	0.22022	-0.00680599
cg05464374	0.362844	0.365566	-0.00272215	0.237258	0.238695	-0.00143712	0.217612	0.236704	-0.0190926	0.131983	0.130301	0.0016816
cg05470074	0.270913	0.212739	0.0581733	0.0596983	0.0855453	-0.025847	0.0650093	0.0382836	0.0267257	0.404758	0.373583	0.0311742
cg05472237	0.819602	0.840732	-0.02113	0.745668	0.769551	-0.023883	0.834907	0.832432	0.002475	0.837071	0.832966	0.0041054
cg05475280	0.461781	0.43765	0.0241315	0.155069	0.164774	-0.00970467	0.423097	0.466038	-0.0429413	0.251874	0.276016	-0.0241418
cg05476089	0.591779	0.606185	-0.0144061	0.603571	0.625098	-0.0215272	0.760025	0.754282	0.00574368	0.586558	0.618963	-0.0324047
cg05476522	0.57915	0.606796	-0.0276453	0.517124	0.501275	0.0158489	0.79821	0.822962	-0.0247514	0.815293	0.855101	-0.0398085
cg05478253	0.0293867	0.0275026	0.00188409	0.102393	0.0765254	0.0258677	0.0436789	0.0434093	0.000269601	0.0509777	0.037693	0.0132847
cg05480640	0.924567	0.951212	-0.0266454	0.909751	0.93705	-0.0272997	0.942825	0.943027	-0.000201956	0.93863	0.93652	0.00211017
cg05483199	0.0454364	0.0307547	0.0146817	0.0661683	0.0852867	-0.0191184	0.0447494	0.0643663	-0.0196169	0.0550025	0.043784	0.0112185
cg05491276	0.530929	0.497564	0.0333655	0.463814	0.489797	-0.0259831	0.613215	0.592207	0.0210074	0.478616	0.488884	-0.0102689
cg05494459	0.218792	0.243487	-0.0246952	0.28865	0.303239	-0.0145889	0.503342	0.510275	-0.00693289	0.0921892	0.0844821	0.00770713
cg05507097	0.780382	0.776112	0.00427025	0.602104	0.584768	0.0173363	0.765788	0.770332	-0.00454424	0.770596	0.763777	0.0068189
cg05511138	0.350534	0.405775	-0.0552412	0.195016	0.191796	0.00322039	0.307756	0.300638	0.00711841	0.288275	0.276277	0.0119975
cg05511752	0.283079	0.318238	-0.0351584	0.186234	0.174401	0.0118327	0.790782	0.790525	0.000257639	0.579055	0.602437	-0.0233818
cg05512407	0.530606	0.551873	-0.0212667	0.548959	0.570168	-0.0212085	0.451874	0.452565	-0.000690841	0.548467	0.561224	-0.0127572
cg05522559	0.725625	0.709898	0.0157271	0.678019	0.689925	-0.0119065	0.767204	0.789979	-0.0227754	0.764961	0.779342	-0.014381
cg05532403	0.562295	0.56378	-0.00148485	0.559923	0.540805	0.0191184	0.748124	0.760558	-0.0124334	0.175091	0.175264	-0.000172691
cg05532720	0.85579	0.858582	-0.00279123	0.806865	0.795185	0.0116803	0.587641	0.638031	-0.0503902	0.781557	0.795884	-0.0143263
cg05539388	0.453975	0.416447	0.0375284	0.43541	0.417201	0.0182094	0.432755	0.433879	-0.00112463	0.673516	0.705004	-0.0314882
cg05542153	0.568506	0.585907	-0.0174013	0.497032	0.503258	-0.00622572	0.749001	0.752461	-0.00346038	0.667544	0.69123	-0.0236855
cg05547600	0.365534	0.400703	-0.0351682	0.491056	0.484209	0.00684691	0.419806	0.408634	0.0111727	0.283269	0.295354	-0.0120852
cg05548952	0.547452	0.531069	0.0163829	0.453315	0.451711	0.00160407	0.41877	0.415772	0.00299722	0.214167	0.229009	-0.0148419
cg05551025	0.373073	0.410764	-0.0376914	0.0223782	0.0236209	-0.00124276	0.630983	0.633378	-0.00239503	0.389684	0.481975	-0.0922913
cg05554396	0.506778	0.500761	0.00601638	0.510719	0.505243	0.00547552	0.669328	0.662751	0.0065775	0.463727	0.493936	-0.0302094
cg05555050	0.511631	0.503303	0.00832753	0.545647	0.52458	0.0210673	0.670556	0.657423	0.0131326	0.821658	0.865971	-0.0443123
cg05555725	0.785345	0.775526	0.00981954	0.512165	0.50512	0.00704462	0.528536	0.530297	-0.00176161	0.816053	0.812191	0.00386119
cg05558522	0.131271	0.131535	-0.00026357	0.420482	0.429837	-0.00935444	0.255405	0.231736	0.0236689	0.323274	0.340768	-0.0174938
cg05559023	0.4489	0.449956	-0.00105625	0.495426	0.491407	0.00401837	0.47053	0.48787	-0.0173401	0.485105	0.449637	0.0354675
cg05559795	0.413411	0.383865	0.0295462	0.545238	0.568722	-0.0234835	0.633915	0.614371	0.019544	0.463513	0.437663	0.0258508
cg05559881	0.745934	0.778267	-0.0323331	0.640701	0.634267	0.00643438	0.52847	0.520571	0.00789956	0.11597	0.118051	-0.0020812
cg05560472	0.625121	0.627195	-0.00207371	0.450057	0.440187	0.00987037	0.102561	0.128517	-0.0259567	0.728061	0.697327	0.0307341
cg05563333	0.518685	0.546143	-0.0274578	0.0893264	0.0937315	-0.00440503	0.0896675	0.0979846	-0.00831708	0.106605	0.109457	-0.00285239
cg05563347	0.551575	0.586146	-0.0345716	0.536495	0.522603	0.0138915	0.831534	0.848894	-0.0173595	0.935148	0.909578	0.0255696
cg05564395	0.720745	0.801886	-0.0811407	0.681274	0.656965	0.0243097	0.647193	0.561615	0.0855782	0.80018	0.734661	0.0655182
cg05565735	0.474784	0.505939	-0.0311552	0.28025	0.263854	0.0163952	0.42082	0.416978	0.00384188	0.623014	0.635376	-0.0123627
cg05566296	0.523315	0.5261	-0.00278547	0.474109	0.494846	-0.0207365	0.623546	0.646626	-0.0230806	0.446459	0.460713	-0.0142537
cg05570079	0.401744	0.342054	0.0596901	0.921287	0.867952	0.0533347	0.722164	0.691586	0.0305773	0.908069	0.895293	0.0127752
cg05570609	0.577102	0.592591	-0.0154885	0.558431	0.516387	0.042044	0.466183	0.458549	0.00763363	0.568258	0.543008	0.0252499
cg05572164	0.438221	0.438845	-0.000624015	0.326904	0.327286	-0.000381662	0.372335	0.352012	0.0203234	0.423447	0.390131	0.0333158
cg05572207	0.141158	0.152245	-0.0110878	0.220746	0.179228	0.041518	0.26525	0.26885	-0.00360054	0.196137	0.193595	0.00254119
cg05573563	0.389029	0.388057	0.000971877	0.718281	0.71618	0.0021015	0.703111	0.669172	0.0339385	0.393781	0.345634	0.0481467
cg05578291	0.086137	0.0899103	-0.00377334	0.423636	0.451004	-0.0273685	0.563768	0.576816	-0.0130479	0.333784	0.404033	-0.0702493
cg05579254	0.74204	0.708967	0.0330725	0.768212	0.789906	-0.0216937	0.426236	0.448414	-0.0221774	0.767057	0.765272	0.00178491
cg05580931	0.64542	0.672082	-0.0266615	0.707826	0.693696	0.0141301	0.581027	0.564965	0.0160621	0.639621	0.622229	0.0173919
cg05585317	0.641444	0.652253	-0.0108091	0.289909	0.311326	-0.0214162	0.263882	0.237581	0.0263004	0.357744	0.395563	-0.0378189
cg05587158	0.324623	0.312821	0.0118015	0.0753682	0.0541921	0.0211762	0.326112	0.322847	0.00326509	0.397358	0.368872	0.0284856
cg05594230	0.46171	0.458536	0.00317411	0.525172	0.554869	-0.0296967	0.644383	0.655996	-0.0116132	0.501152	0.485984	0.015168
cg05599348	0.123337	0.120387	0.00295045	0.567937	0.546857	0.0210797	0.544034	0.540732	0.00330198	0.241637	0.230206	0.0114309
cg05605384	0.20302	0.217462	-0.014442	0.310561	0.322587	-0.0120267	0.0142942	0.0278282	-0.013534	0.513504	0.511786	0.00171848
cg05605944	0.705104	0.681231	0.0238726	0.816749	0.823793	-0.00704328	0.633018	0.610429	0.0225883	0.792983	0.784633	0.0083501
cg05638634	0.762706	0.775729	-0.0130223	0.566088	0.494027	0.0720614	0.201126	0.210865	-0.009739	0.444065	0.414405	0.0296596
cg05652828	0.481039	0.468107	0.0129325	0.599986	0.61287	-0.012884	0.437781	0.458444	-0.0206626	0.594791	0.577601	0.0171896
cg05655038	0.947991	0.911667	0.0363245	0.879847	0.919804	-0.0399566	0.906277	0.893746	0.0125308	0.919474	0.918967	0.000506301
cg05655041	0.845832	0.876071	-0.0302382	0.881236	0.829793	0.0514421	0.871652	0.862444	0.00920809	0.800956	0.784511	0.0164444
cg05666266	0.408271	0.410245	-0.00197393	0.264525	0.264484	4.08526e-05	0.510719	0.537187	-0.0264689	0.298622	0.242471	0.0561512
cg05673346	0.377056	0.379835	-0.00277926	0.386836	0.38707	-0.000234478	0.51304	0.524907	-0.0118662	0.390427	0.376362	0.0140654
cg05680973	0.352596	0.357949	-0.00535323	0.66629	0.690657	-0.0243668	0.438358	0.416151	0.0222063	0.23043	0.22439	0.00603943
cg05682970	0.720585	0.695459	0.0251259	0.645625	0.626007	0.0196175	0.513844	0.514726	-0.000881495	0.686792	0.648739	0.0380531
cg05684200	0.487424	0.521284	-0.0338601	0.812538	0.818066	-0.00552778	0.821271	0.830881	-0.00961002	0.452167	0.458352	-0.00618462
cg05685296	0.828339	0.834418	-0.00607935	0.855379	0.882535	-0.0271556	0.917778	0.93396	-0.0161811	0.865556	0.843879	0.0216767
cg05688478	0.563983	0.562896	0.00108762	0.61494	0.632012	-0.0170721	0.535735	0.524423	0.0113122	0.543313	0.586379	-0.0430663
cg05689984	0.805581	0.800712	0.00486829	0.80256	0.821117	-0.0185568	0.667083	0.624759	0.0423242	0.796046	0.803665	-0.00761886
cg05690949	0.0525825	0.0566132	-0.00403069	0.32148	0.306136	0.0153443	0.349504	0.366496	-0.0169925	0.128356	0.11693	0.0114258
cg05695951	0.621859	0.613028	0.00883104	0.819215	0.786118	0.0330971	0.826696	0.821658	0.00503767	0.773862	0.818066	-0.0442044
cg05695959	0.569515	0.576541	-0.00702642	0.522185	0.50842	0.0137657	0.854816	0.851984	0.00283153	0.878565	0.884992	-0.00642766
cg05699139	0.443949	0.467709	-0.0237594	0.205326	0.206238	-0.000911915	0.612246	0.63066	-0.018414	0.177576	0.174867	0.00270851
cg05706696	0.52222	0.546598	-0.024378	0.528682	0.573709	-0.0450273	0.64356	0.658274	-0.0147139	0.457883	0.468898	-0.0110142
cg05720573	0.865616	0.867817	-0.00220087	0.0735906	0.0544835	0.0191071	0.443585	0.460717	-0.0171322	0.797601	0.780383	0.0172181
cg05721877	0.428207	0.429858	-0.00165076	0.100581	0.0439803	0.0566005	0.402446	0.4428	-0.0403539	0.775672	0.788601	-0.0129292
cg05735850	0.725267	0.709436	0.0158313	0.739234	0.784511	-0.0452769	0.830974	0.83012	0.000854457	0.79715	0.8039	-0.00674975
cg05740959	0.342128	0.357949	-0.0158213	0.437213	0.454715	-0.0175018	0.573358	0.611325	-0.0379669	0.436513	0.451626	-0.0151135
cg05742782	0.885586	0.913732	-0.0281467	0.911057	0.855568	0.0554888	0.861378	0.872917	-0.0115389	0.886819	0.908213	-0.0213947
cg05748359	0.366061	0.383475	-0.0174142	0.331344	0.33389	-0.00254582	0.504662	0.507564	-0.00290251	0.561283	0.560024	0.00125919
cg05748796	0.718615	0.703265	0.0153502	0.761805	0.774751	-0.0129461	0.424161	0.410638	0.0135232	0.768051	0.68369	0.0843619
cg05749792	0.216012	0.168487	0.047525	0.558214	0.615574	-0.0573601	0.487627	0.454946	0.0326806	0.456387	0.451897	0.00448999
cg05756954	0.106451	0.101441	0.00500997	0.117047	0.0846661	0.0323813	0.128227	0.128686	-0.000459449	0.101477	0.0924293	0.00904806
cg05772663	0.263181	0.306326	-0.043145	0.151223	0.122966	0.0282567	0.872543	0.875483	-0.00293982	0.0859093	0.0950558	-0.00914646
cg05777666	0.408738	0.424127	-0.0153889	0.180573	0.1734	0.00717252	0.66875	0.619417	0.0493328	0.131062	0.144711	-0.0136495
cg05777690	0.104083	0.106697	-0.00261404	0.0487754	0.0490009	-0.000225479	0.038863	0.0741605	-0.0352975	0.160533	0.178865	-0.0183323
cg05782651	0.372818	0.324307	0.0485106	0.455559	0.461025	-0.00546533	0.525028	0.520838	0.0041904	0.115313	0.125061	-0.0097482
cg05783039	0.08695	0.0908352	-0.00388515	0.175307	0.16824	0.00706707	0.27656	0.274491	0.00206915	0.047807	0.0424842	0.00532278
cg05785376	0.719862	0.730397	-0.0105349	0.863318	0.865824	-0.0025064	0.851708	0.847203	0.00450561	0.751378	0.775764	-0.0243858
cg05786601	0.328748	0.332992	-0.00424425	0.358912	0.37274	-0.0138278	0.238283	0.247217	-0.00893338	0.0760341	0.07818	-0.00214593
cg05789980	0.321247	0.33977	-0.018523	0.40181	0.411831	-0.0100211	0.465482	0.476792	-0.0113102	0.385111	0.382836	0.00227456
cg05793108	0.747477	0.740205	0.00727264	0.557269	0.560091	-0.00282187	0.577813	0.569711	0.00810223	0.524614	0.516951	0.00766297
cg05793280	0.679809	0.700368	-0.020559	0.727931	0.730157	-0.00222594	0.457244	0.434054	0.0231909	0.733086	0.738731	-0.00564527
cg05802072	0.867063	0.887274	-0.0202114	0.674354	0.624835	0.0495193	0.953259	0.954037	-0.000777941	0.6032	0.528407	0.0747934
cg05803942	0.277805	0.283197	-0.00539249	0.0699225	0.0801759	-0.0102535	0.429416	0.443602	-0.0141866	0.355323	0.354313	0.00100978
cg05806387	0.712905	0.708693	0.00421205	0.62661	0.591615	0.0349949	0.444709	0.432742	0.0119672	0.548883	0.561082	-0.012199
cg05807734	0.515719	0.52805	-0.0123316	0.557961	0.500995	0.0569661	0.449631	0.470139	-0.0205083	0.507564	0.465666	0.0418985
cg05812657	0.884804	0.831386	0.0534173	0.837879	0.810699	0.0271804	0.883599	0.899194	-0.0155957	0.810377	0.780917	0.0294604
cg05826817	0.0396017	0.0405943	-0.000992591	0.0825309	0.0849595	-0.00242857	0.0907597	0.0947257	-0.00396599	0.0466965	0.0412434	0.00545311
cg05832562	0.18643	0.195299	-0.00886893	0.13983	0.114877	0.024953	0.209772	0.212436	-0.00266419	0.107515	0.100038	0.00747687
cg05833518	0.806501	0.79987	0.00663043	0.869779	0.836848	0.0329315	0.809607	0.808563	0.00104385	0.725407	0.737533	-0.0121263
cg05836475	0.252739	0.241425	0.0113143	0.876707	0.874472	0.00223454	0.51283	0.50598	0.00684988	0.851754	0.855101	-0.00334702
cg05837244	0.901967	0.889075	0.0128917	0.860035	0.889546	-0.0295106	0.868457	0.876882	-0.00842479	0.906081	0.911779	-0.00569868
cg05839786	0.625655	0.620528	0.00512701	0.813409	0.815451	-0.0020414	0.814829	0.816282	-0.00145309	0.808563	0.793834	0.0147287
cg05849149	0.189573	0.184351	0.00522159	0.11765	0.123874	-0.00622389	0.269237	0.257751	0.0114857	0.437595	0.444178	-0.00658308
cg05856884	0.762086	0.762055	3.08057e-05	0.594466	0.547732	0.0467336	0.387354	0.391796	-0.00444219	0.786837	0.829445	-0.0426077
cg05858130	0.470975	0.489842	-0.0188675	0.619607	0.633968	-0.0143609	0.527716	0.516249	0.0114671	0.73884	0.72343	0.0154102
cg05861409	0.587888	0.569657	0.0182311	0.180115	0.177496	0.00261831	0.680021	0.66462	0.0154003	0.526276	0.563326	-0.0370508
cg05866836	0.10737	0.114657	-0.00728711	0.223502	0.221189	0.00231278	0.315231	0.288133	0.0270982	0.163185	0.165774	-0.00258909
cg05867448	0.466701	0.475164	-0.00846282	0.623042	0.622229	0.000813138	0.362836	0.365395	-0.00255873	0.863268	0.895033	-0.0317648
cg05870108	0.632497	0.651124	-0.0186268	0.870471	0.889687	-0.0192163	0.883368	0.888505	-0.00513686	0.495259	0.548179	-0.0529203
cg05870315	0.0745827	0.0733241	0.00125858	0.497521	0.502844	-0.00532333	0.111421	0.0970215	0.0143995	0.054478	0.0541921	0.00028591
cg05872215	0.0474718	0.0452423	0.00222952	0.0577631	0.0682051	-0.010442	0.117726	0.0859621	0.0317643	0.0638627	0.0625348	0.00132792
cg05872808	0.509847	0.513737	-0.00388994	0.5826	0.618459	-0.035859	0.381318	0.387563	-0.00624484	0.589158	0.589759	-0.000600649
cg05873659	0.652243	0.621022	0.0312204	0.722521	0.698498	0.0240231	0.0797543	0.0470184	0.0327359	0.653655	0.653031	0.000624031
cg05875427	0.820336	0.789832	0.0305043	0.668626	0.683588	-0.0149623	0.448678	0.437941	0.0107366	0.506048	0.494027	0.0120215
cg05877833	0.565195	0.535814	0.0293805	0.759704	0.780068	-0.0203639	0.392066	0.387654	0.00441157	0.636827	0.640676	-0.00384918
cg05878968	0.856258	0.832543	0.0237146	0.820256	0.830987	-0.0107315	0.807598	0.816808	-0.00920992	0.660787	0.654302	0.00648455
cg05880897	0.0545966	0.0501833	0.00441328	0.042932	0.0442438	-0.00131178	0.0464163	0.0512312	-0.00481486	0.0929898	0.0933789	-0.000389048
cg05884886	0.445081	0.43959	0.00549125	0.46883	0.481707	-0.0128772	0.373567	0.364648	0.00891908	0.471585	0.46235	0.00923422
cg05889382	0.4242	0.410334	0.0138658	0.729179	0.710784	0.0183954	0.675762	0.598898	0.0768642	0.45478	0.467816	-0.0130367
cg05889642	0.484477	0.503303	-0.0188259	0.477365	0.500863	-0.0234977	0.631812	0.632988	-0.00117537	0.464896	0.478726	-0.0138301
cg05891083	0.082209	0.0731785	0.00903049	0.0436789	0.0478651	-0.00418623	0.0496825	0.0542577	-0.00457524	0.0483998	0.048283	0.000116784
cg05892376	0.383088	0.432963	-0.0498744	0.0941466	0.0825097	0.011637	0.0837083	0.135115	-0.0514066	0.330856	0.377017	-0.0461612
cg05894744	0.734602	0.745371	-0.0107686	0.851368	0.843879	0.00748941	0.496049	0.507475	-0.0114267	0.741237	0.7443	-0.00306299
cg05895666	0.0403707	0.0382898	0.00208089	0.0683194	0.0462711	0.0220484	0.0449727	0.0422074	0.00276533	0.032707	0.0422118	-0.00950476
cg05899258	0.507279	0.540664	-0.0333852	0.771981	0.775182	-0.00320104	0.446541	0.436156	0.0103851	0.687015	0.730542	-0.0435268
cg05902460	0.750922	0.736463	0.014459	0.721961	0.705351	0.0166103	0.826308	0.8196	0.00670797	0.706431	0.74905	-0.0426182
cg05902740	0.16345	0.163547	-9.68892e-05	0.257534	0.255342	0.00219201	0.110655	0.0879476	0.0227071	0.206178	0.212474	-0.00629618
cg05903800	0.781416	0.765009	0.016407	0.523775	0.514065	0.00970989	0.822648	0.816053	0.00659524	0.809725	0.824413	-0.0146886
cg05906362	0.0594168	0.0590362	0.000380572	0.0819932	0.107874	-0.0258813	0.110769	0.133702	-0.0229328	0.116249	0.1146	0.00164916
cg05908833	0.0371979	0.0428071	-0.00560921	0.0456418	0.0501795	-0.00453771	0.0527142	0.0395796	0.0131347	0.0396974	0.041463	-0.00176564
cg05911704	0.468324	0.478892	-0.0105673	0.495194	0.556876	-0.0616823	0.544118	0.545791	-0.00167305	0.458958	0.519334	-0.0603757
cg05911774	0.738962	0.685521	0.0534415	0.0295092	0.0224681	0.00704117	0.148046	0.13564	0.0124054	0.559049	0.587475	-0.0284265
cg05915658	0.0972113	0.0911755	0.00603581	0.069121	0.0494071	0.0197139	0.0638167	0.0646765	-0.000859734	0.123965	0.123608	0.000357395
cg05921207	0.349306	0.38222	-0.0329139	0.384567	0.388996	-0.0044296	0.333604	0.348543	-0.0149385	0.23307	0.227561	0.00550881
cg05929502	0.193719	0.243889	-0.05017	0.0397769	0.0503436	-0.0105667	0.0454974	0.0455308	-3.33467e-05	0.258451	0.207922	0.0505286
cg05933703	0.275359	0.285746	-0.0103869	0.356176	0.348153	0.00802259	0.430703	0.439346	-0.00864334	0.430296	0.376928	0.0533689
cg05939965	0.86762	0.870277	-0.00265641	0.816178	0.819224	-0.0030461	0.794814	0.765332	0.0294816	0.72409	0.810591	-0.0865006
cg05943154	0.840902	0.802116	0.0387866	0.610578	0.5818	0.0287779	0.753483	0.732596	0.0208872	0.642336	0.617277	0.0250594
cg05943755	0.56576	0.605927	-0.0401675	0.857089	0.849521	0.00756741	0.886148	0.876507	0.00964083	0.871429	0.885177	-0.013748
cg05947181	0.695108	0.685883	0.00922477	0.659629	0.671445	-0.0118154	0.794611	0.823355	-0.0287442	0.89594	0.910766	-0.0148258
cg05950094	0.277578	0.280856	-0.00327729	0.619828	0.660306	-0.0404776	0.791026	0.807532	-0.0165064	0.0673061	0.0846661	-0.01736
cg05958056	0.909731	0.912579	-0.00284775	0.849512	0.852614	-0.00310239	0.895656	0.868318	0.027338	0.920623	0.902557	0.018066
cg05961595	0.466244	0.473977	-0.0077329	0.294406	0.289402	0.00500422	0.455181	0.473123	-0.0179415	0.510696	0.501742	0.00895376
cg05965444	0.389493	0.402589	-0.0130959	0.437274	0.439979	-0.00270472	0.564277	0.552745	0.0115319	0.4123	0.403648	0.00865136
cg05967389	0.726966	0.720344	0.00662213	0.831638	0.832294	-0.000656536	0.71785	0.678131	0.0397191	0.405393	0.443076	-0.0376829
cg05975021	0.410796	0.442445	-0.0316485	0.296431	0.286639	0.00979115	0.0640316	0.0758641	-0.0118325	0.260511	0.303013	-0.0425012
cg05980727	0.685012	0.706581	-0.0215694	0.564076	0.62713	-0.0630544	0.878221	0.867977	0.0102444	0.835451	0.855568	-0.0201164
cg05996238	0.646154	0.641935	0.00421892	0.509631	0.525065	-0.0154339	0.77238	0.778221	-0.00584056	0.789005	0.796129	-0.00712416
cg06000876	0.784952	0.778472	0.00647975	0.407394	0.420102	-0.0127084	0.83682	0.8332	0.00362008	0.423286	0.396357	0.0269297
cg06002208	0.752727	0.737683	0.0150441	0.855185	0.817438	0.0377467	0.742897	0.752786	-0.00988909	0.750197	0.7645	-0.0143034
cg06002470	0.221118	0.256169	-0.0350503	0.381318	0.396553	-0.0152351	0.217416	0.236571	-0.0191556	0.359274	0.372644	-0.01337
cg06008640	0.514337	0.473482	0.0408555	0.323522	0.290885	0.032637	0.526322	0.50566	0.0206621	0.619417	0.582248	0.0371689
cg06010380	0.341171	0.330202	0.010969	0.58927	0.641427	-0.0521579	0.143519	0.191723	-0.0482046	0.405249	0.458638	-0.0533884
cg06014506	0.468857	0.473745	-0.00488794	0.575022	0.584846	-0.00982323	0.836054	0.849999	-0.0139456	0.864316	0.874663	-0.0103472
cg06015784	0.132423	0.135448	-0.00302476	0.624458	0.653163	-0.0287046	0.400418	0.393629	0.00678937	0.645837	0.637088	0.00874977
cg06016684	0.381807	0.364888	0.0169193	0.34105	0.385488	-0.0444386	0.222562	0.255755	-0.0331927	0.622721	0.642167	-0.0194459
cg06036585	0.612029	0.615985	-0.00395529	0.550093	0.47564	0.0744536	0.427558	0.429218	-0.00165979	0.512936	0.454011	0.0589254
cg06037923	0.0486782	0.0586883	-0.01001	0.0859302	0.073419	0.0125111	0.129907	0.131574	-0.00166668	0.0724275	0.0738681	-0.00144069
cg06039729	0.0165182	0.0187178	-0.00219966	0.0148063	0.011905	0.00290129	0.610162	0.637795	-0.0276333	0.477056	0.450247	0.0268085
cg06041240	0.876465	0.844819	0.0316462	0.900382	0.883532	0.0168503	0.880098	0.863502	0.0165955	0.928934	0.889546	0.0393882
cg06042004	0.531745	0.545743	-0.0139981	0.341175	0.38462	-0.0434444	0.399638	0.414914	-0.0152751	0.501953	0.528113	-0.0261603
cg06046085	0.725793	0.74261	-0.0168164	0.494849	0.500056	-0.00520683	0.805356	0.797295	0.00806081	0.499604	0.468218	0.0313863
cg06046696	0.741815	0.715273	0.0265422	0.55141	0.480579	0.0708309	0.434833	0.414145	0.0206878	0.582746	0.491561	0.0911852
cg06051662	0.240598	0.258844	-0.0182464	0.209475	0.21015	-0.00067457	0.227749	0.23307	-0.00532125	0.112035	0.101368	0.0106672
cg06055803	0.714275	0.734233	-0.0199576	0.762856	0.78068	-0.0178238	0.680829	0.615644	0.0651853	0.849819	0.81904	0.0307792
cg06068111	0.91881	0.915538	0.00327282	0.83682	0.891911	-0.0550906	0.878481	0.907515	-0.0290346	0.850236	0.883881	-0.0336448
cg06068202	0.489941	0.547022	-0.057081	0.494585	0.512107	-0.0175219	0.907778	0.940078	-0.0323	0.4757	0.507876	-0.0321759
cg06069823	0.491629	0.513952	-0.0223233	0.437874	0.422173	0.015701	0.405533	0.431184	-0.0256508	0.560002	0.560445	-0.000442631
cg06070578	0.906637	0.901498	0.00513883	0.54672	0.564748	-0.0180273	0.703697	0.731135	-0.0274378	0.751041	0.763346	-0.0123045
cg06079646	0.456039	0.480819	-0.0247796	0.443019	0.504695	-0.0616757	0.930074	0.914116	0.0159586	0.460717	0.467647	-0.00692985
cg06084034	0.559452	0.547435	0.012016	0.534243	0.544361	-0.0101178	0.715785	0.748242	-0.0324568	0.930896	0.924003	0.00689301
cg06091035	0.666879	0.669807	-0.0029279	0.674739	0.658331	0.0164079	0.63051	0.593161	0.0373494	0.678727	0.660702	0.0180249
cg06099218	0.0442744	0.0538206	-0.00954628	0.0453898	0.0416573	0.00373244	0.0540991	0.0629526	-0.00885351	0.0973409	0.103198	-0.00585694
cg06102452	0.616037	0.614713	0.00132352	0.421952	0.399272	0.0226798	0.40234	0.401716	0.000624034	0.656877	0.650244	0.00663279
cg06102971	0.484253	0.433059	0.0511941	0.283362	0.274565	0.00879683	0.729758	0.719333	0.0104244	0.188507	0.19232	-0.00381311
cg06104959	0.561912	0.575567	-0.0136557	0.841286	0.851249	-0.00996272	0.851528	0.865154	-0.0136251	0.842862	0.858859	-0.0159965
cg06106988	0.748349	0.7373	0.0110488	0.720203	0.749142	-0.0289396	0.576816	0.586558	-0.00974282	0.674425	0.682444	-0.0080191
cg06107108	0.684837	0.660928	0.023909	0.570307	0.566258	0.00404881	0.478761	0.481786	-0.00302474	0.745406	0.753236	-0.0078291
cg06109624	0.655418	0.638453	0.0169656	0.359413	0.354313	0.00509967	0.483272	0.495508	-0.0122364	0.563817	0.558028	0.00578866
cg06116593	0.824111	0.854175	-0.0300649	0.918325	0.92359	-0.00526545	0.931408	0.93863	-0.0072217	0.949556	0.906373	0.0431829
cg06116594	0.0258184	0.0272893	-0.00147088	0.026114	0.0219802	0.00413379	0.0243958	0.0216608	0.00273494	0.0402747	0.0415168	-0.00124207
cg06122016	0.541103	0.512892	0.028211	0.619962	0.62538	-0.00541834	0.500256	0.497849	0.00240796	0.508976	0.470203	0.0387732
cg06126323	0.571991	0.56418	0.00781168	0.607166	0.6036	0.00356696	0.5491	0.537488	0.0116122	0.550245	0.539952	0.0102924
cg06127902	0.170387	0.16538	0.00500669	0.245831	0.251784	-0.0059532	0.380776	0.373059	0.00771652	0.235768	0.211283	0.024485
cg06128881	0.212771	0.235919	-0.0231479	0.521055	0.519402	0.00165339	0.705863	0.685147	0.0207154	0.536687	0.511846	0.0248404
cg06129596	0.773823	0.744405	0.0294184	0.88215	0.878887	0.00326274	0.889538	0.901052	-0.011514	0.775428	0.75678	0.0186481
cg06137651	0.889802	0.908379	-0.0185775	0.949551	0.945026	0.00452518	0.938226	0.924261	0.013965	0.941289	0.939482	0.00180636
cg06139288	0.544404	0.538878	0.00552563	0.549666	0.545268	0.00439793	0.685795	0.701843	-0.016048	0.400403	0.388517	0.0118859
cg06140460	0.472108	0.478004	-0.00589632	0.465386	0.490617	-0.0252315	0.267292	0.27367	-0.0063776	0.478004	0.471005	0.00699883
cg06140761	0.566963	0.545101	0.0218614	0.62984	0.620405	0.00943579	0.492534	0.46822	0.0243143	0.287236	0.305273	-0.0180365
cg06143713	0.161951	0.163459	-0.00150861	0.504047	0.463399	0.0406483	0.427783	0.419276	0.00850716	0.364248	0.349598	0.0146507
cg06144608	0.224338	0.240093	-0.0157547	0.385403	0.409634	-0.0242302	0.24911	0.27769	-0.0285804	0.0926859	0.102931	-0.0102454
cg06144825	0.0730937	0.0611511	0.0119426	0.0289917	0.0493428	-0.0203512	0.0569888	0.0708397	-0.0138509	0.411557	0.444291	-0.032734
cg06144999	0.471612	0.43575	0.0358616	0.496879	0.498197	-0.00131793	0.403345	0.434152	-0.0308073	0.409404	0.430076	-0.020672
cg06145357	0.221486	0.260516	-0.0390292	0.710951	0.738257	-0.0273064	0.173747	0.182991	-0.00924483	0.538941	0.534165	0.00477659
cg06149454	0.507134	0.491809	0.0153252	0.522515	0.56612	-0.0436045	0.636849	0.651239	-0.0143901	0.506934	0.500056	0.006878
cg06152434	0.863872	0.865407	-0.0015353	0.612709	0.611588	0.0011207	0.764161	0.761028	0.00313276	0.679299	0.639531	0.0397681
cg06152508	0.259636	0.258282	0.00135422	0.241585	0.232099	0.00948602	0.192726	0.199101	-0.00637401	0.605391	0.602223	0.00316767
cg06157561	0.84499	0.844112	0.000878113	0.875733	0.867002	0.00873112	0.321289	0.284043	0.0372466	0.904004	0.871659	0.0323451
cg06159667	0.18041	0.179123	0.00128648	0.163102	0.166955	-0.00385237	0.376586	0.378465	-0.00187931	0.313846	0.288083	0.0257629
cg06162422	0.505108	0.496303	0.00880462	0.503496	0.484431	0.0190656	0.65998	0.638119	0.0218612	0.496168	0.516066	-0.0198981
cg06163534	0.34009	0.373101	-0.033011	0.23456	0.219106	0.0154534	0.389018	0.388691	0.000327203	0.368595	0.346515	0.0220802
cg06165699	0.0792895	0.0804364	-0.0011469	0.157765	0.180085	-0.0223194	0.153667	0.146703	0.00696376	0.0764729	0.0735852	0.00288768
cg06168286	0.197201	0.227847	-0.0306459	0.365784	0.389441	-0.0236576	0.371368	0.373562	-0.00219391	0.32466	0.320343	0.00431745
cg06170215	0.477276	0.509993	-0.0327175	0.516157	0.55757	-0.0414127	0.297963	0.313846	-0.015883	0.123372	0.116628	0.006744
cg06172119	0.646982	0.6564	-0.00941823	0.520409	0.458721	0.0616879	0.543683	0.544717	-0.00103371	0.754498	0.750783	0.0037154
cg06174815	0.521184	0.500298	0.0208856	0.450057	0.496171	-0.046114	0.753305	0.709858	0.0434474	0.496733	0.546857	-0.0501245
cg06180047	0.0284293	0.0286153	-0.000186034	0.039845	0.0388611	0.000983941	0.0398916	0.020999	0.0188926	0.0382109	0.0212575	0.0169534
cg06184979	0.717493	0.729588	-0.0120952	0.72748	0.729198	-0.0017188	0.589637	0.620961	-0.0313242	0.742689	0.755912	-0.013223
cg06185870	0.235941	0.216828	0.0191133	0.496702	0.500752	-0.00404924	0.328939	0.336888	-0.00794894	0.503603	0.540251	-0.0366488
cg06186228	0.116057	0.118361	-0.00230321	0.126419	0.124319	0.00209961	0.0908248	0.109511	-0.0186858	0.205843	0.180965	0.0248771
cg06187102	0.715042	0.77007	-0.0550274	0.838243	0.886917	-0.0486736	0.660282	0.63096	0.0293224	0.902277	0.866429	0.0358485
cg06190216	0.242127	0.223535	0.0185917	0.106305	0.115196	-0.00889189	0.106674	0.108515	-0.00184151	0.31748	0.289868	0.0276118
cg06204009	0.659385	0.679044	-0.0196592	0.63006	0.642402	-0.0123416	0.576164	0.581869	-0.00570486	0.707224	0.686504	0.0207207
cg06205205	0.595223	0.606307	-0.0110843	0.786944	0.786403	0.000541323	0.783702	0.770727	0.0129754	0.490214	0.489428	0.00078615
cg06208111	0.929592	0.930073	-0.00048156	0.671944	0.641567	0.030377	0.528364	0.504245	0.0241189	0.790393	0.819909	-0.0295165
cg06213900	0.558932	0.552544	0.0063878	0.230363	0.235967	-0.00560329	0.411765	0.391647	0.0201183	0.529205	0.532086	-0.00288065
cg06216469	0.916715	0.884644	0.0320705	0.603502	0.59822	0.00528216	0.901622	0.901813	-0.000191148	0.859369	0.886498	-0.0271288
cg06219046	0.50614	0.515045	-0.00890506	0.672278	0.661491	0.0107874	0.471616	0.467716	0.00390023	0.372482	0.358299	0.0141831
cg06219927	0.654358	0.694301	-0.0399432	0.427783	0.439636	-0.0118527	0.2185	0.21816	0.000339971	0.486366	0.367974	0.118392
cg06220755	0.376135	0.368226	0.00790912	0.403177	0.400494	0.00268389	0.359928	0.351476	0.00845201	0.484899	0.526535	-0.0416365
cg06230327	0.473545	0.464697	0.00884799	0.495717	0.517989	-0.0222713	0.510073	0.492598	0.0174749	0.645707	0.673704	-0.0279966
cg06231015	0.93394	0.923994	0.00994524	0.920978	0.937708	-0.0167294	0.957604	0.925382	0.0322225	0.920185	0.944423	-0.0242378
cg06231618	0.0457788	0.0493605	-0.00358174	0.0907597	0.071095	0.0196647	0.119621	0.0505422	0.0690784	0.0531614	0.0518643	0.0012971
cg06232789	0.907473	0.923174	-0.0157009	0.870967	0.89031	-0.019343	0.890895	0.901241	-0.0103463	0.919348	0.895394	0.0239539
cg06232846	0.359416	0.367601	-0.00818492	0.410654	0.386899	0.023755	0.268133	0.26633	0.0018034	0.433685	0.41805	0.015635
cg06233761	0.547751	0.543119	0.00463204	0.234157	0.227317	0.00683974	0.177842	0.152538	0.0253044	0.625468	0.653764	-0.028296
cg06234064	0.77396	0.771849	0.00211103	0.770539	0.775376	-0.00483769	0.457001	0.463618	-0.00661679	0.571352	0.590278	-0.0189262
cg06242330	0.905575	0.929607	-0.0240324	0.874743	0.885505	-0.0107617	0.89539	0.914982	-0.0195922	0.908222	0.9185	-0.0102778
cg06246900	0.624417	0.609422	0.0149948	0.552735	0.483734	0.0690009	0.505359	0.497799	0.00756002	0.654396	0.616171	0.0382256
cg06253229	0.617051	0.610902	0.00614853	0.704403	0.710172	-0.00576924	0.406047	0.406308	-0.00026025	0.598185	0.603435	-0.00525003
cg06259852	0.807524	0.831879	-0.0243549	0.780549	0.772417	0.0081313	0.591443	0.495639	0.0958039	0.875051	0.870166	0.00488491
cg06267401	0.819852	0.804384	0.0154681	0.894932	0.867471	0.0274602	0.896617	0.901388	-0.00477191	0.607601	0.601297	0.00630406
cg06269080	0.514991	0.553133	-0.0381423	0.527716	0.538054	-0.0103379	0.247782	0.251445	-0.00366285	0.533223	0.534078	-0.000854633
cg06270497	0.433484	0.404148	0.0293364	0.397732	0.39356	0.00417237	0.383147	0.379493	0.00365383	0.397714	0.432374	-0.0346602
cg06272245	0.451863	0.432122	0.0197409	0.484999	0.493239	-0.00824004	0.421347	0.437675	-0.0163289	0.336501	0.354483	-0.0179823
cg06273903	0.467525	0.468582	-0.00105716	0.166778	0.157211	0.00956673	0.558724	0.544787	0.0139372	0.48762	0.458795	0.0288255
cg06277838	0.452384	0.45903	-0.00664631	0.384232	0.394092	-0.00986045	0.610687	0.611068	-0.000381224	0.459239	0.447951	0.011288
cg06282524	0.831484	0.836792	-0.00530807	0.614155	0.609155	0.00500023	0.709756	0.740114	-0.0303583	0.163754	0.16405	-0.000296712
cg06286431	0.0308709	0.0330597	-0.00218878	0.0267276	0.0409979	-0.0142703	0.0288377	0.0478599	-0.0190221	0.027745	0.025043	0.00270206
cg06287707	0.0244484	0.0380382	-0.0135898	0.0364079	0.0444264	-0.00801852	0.0551286	0.0422744	0.0128542	0.0295062	0.0337219	-0.0042157
cg06288270	0.773701	0.778875	-0.0051746	0.72564	0.706637	0.0190031	0.780549	0.781459	-0.000910837	0.730484	0.701756	0.0287275
cg06289882	0.0924811	0.0969499	-0.0044688	0.0962057	0.135682	-0.039476	0.369827	0.359274	0.0105531	0.199101	0.229738	-0.0306372
cg06291093	0.354229	0.316892	0.0373372	0.422069	0.418497	0.00357259	0.373745	0.377428	-0.00368266	0.571996	0.57851	-0.00651363
cg06292022	0.890968	0.908918	-0.0179502	0.926075	0.924576	0.001499	0.848071	0.86144	-0.0133683	0.862062	0.833324	0.0287376
cg06293983	0.48685	0.538079	-0.0512289	0.0209992	0.0190555	0.00194372	0.0165138	0.0148059	0.00170793	0.546641	0.632012	-0.0853719
cg06295352	0.467999	0.482499	-0.0144997	0.16181	0.132401	0.0294086	0.0902024	0.117427	-0.027225	0.448247	0.463699	-0.0154516
cg06298361	0.175161	0.16444	0.0107209	0.288119	0.300934	-0.0128151	0.499243	0.503325	-0.0040821	0.40388	0.382652	0.021228
cg06300107	0.0559139	0.054489	0.00142486	0.0946598	0.0703044	0.0243554	0.109642	0.0877405	0.0219014	0.142548	0.127369	0.0151792
cg06302218	0.0778051	0.0702605	0.00754461	0.20312	0.217567	-0.0144462	0.183084	0.213297	-0.0302128	0.269931	0.262554	0.00737724
cg06306751	0.0492013	0.0394233	0.00977796	0.0617192	0.0383383	0.0233809	0.0613393	0.0549198	0.00641944	0.0808143	0.0803494	0.000464894
cg06307153	0.44192	0.473606	-0.0316864	0.483533	0.514795	-0.0312619	0.337544	0.349506	-0.0119619	0.456668	0.459534	-0.00286615
cg06308344	0.579379	0.570463	0.00891564	0.0693587	0.0592224	0.0101362	0.479352	0.466489	0.012863	0.549901	0.545387	0.00451401
cg06308972	0.403376	0.297495	0.105881	0.0927168	0.0562918	0.036425	0.0395132	0.0527899	-0.0132768	0.0741605	0.067315	0.00684555
cg06310760	0.651319	0.648021	0.00329759	0.620376	0.619787	0.000589417	0.449158	0.439504	0.00965455	0.403573	0.417254	-0.0136804
cg06313930	0.271867	0.276627	-0.00475999	0.63775	0.671552	-0.0338017	0.0307107	0.027927	0.00278373	0.0395796	0.0426483	-0.00306871
cg06323119	0.861108	0.885967	-0.0248591	0.871771	0.873559	-0.00178843	0.869464	0.871814	-0.00235075	0.847768	0.887124	-0.0393553
cg06323885	0.60054	0.605044	-0.00450414	0.592626	0.618329	-0.0257036	0.735573	0.703514	0.0320585	0.583144	0.58491	-0.00176518
cg06327799	0.286635	0.325073	-0.0384376	0.379022	0.366878	0.0121437	0.211562	0.205655	0.00590733	0.105257	0.0981194	0.00713755
cg06338119	0.0444467	0.0479912	-0.00354451	0.101959	0.0961196	0.00583932	0.3686	0.366762	0.0018377	0.409925	0.374599	0.0353257
cg06350107	0.2218	0.268022	-0.0462216	0.6178	0.573906	0.0438937	0.432802	0.448652	-0.0158494	0.133738	0.11794	0.015798
cg06363801	0.510702	0.52385	-0.0131473	0.515501	0.522896	-0.00739542	0.601647	0.625468	-0.0238216	0.477421	0.515078	-0.0376571
cg06372522	0.689317	0.671907	0.0174103	0.721249	0.75232	-0.0310713	0.472112	0.468587	0.00352519	0.48023	0.429996	0.0502334
cg06373526	0.245481	0.241868	0.00361282	0.32191	0.309861	0.012049	0.429797	0.426351	0.00344613	0.273752	0.295147	-0.0213952
cg06375559	0.919636	0.937412	-0.017776	0.886491	0.868942	0.0175489	0.889081	0.899684	-0.0106029	0.894091	0.880967	0.0131245
cg06376033	0.222792	0.228338	-0.0055462	0.290161	0.279198	0.0109628	0.373182	0.390731	-0.0175486	0.308973	0.332889	-0.023916
cg06376940	0.0345683	0.0475822	-0.0130139	0.0472657	0.0688625	-0.0215968	0.0435529	0.0952851	-0.0517322	0.0449932	0.0403314	0.00466182
cg06379640	0.0856793	0.104331	-0.0186514	0.107755	0.146131	-0.0383765	0.16509	0.231018	-0.0659281	0.312923	0.275642	0.037281
cg06384491	0.821935	0.856774	-0.0348386	0.846415	0.846826	-0.000411564	0.811398	0.817656	-0.00625842	0.841178	0.839491	0.00168764
cg06384623	0.160498	0.162402	-0.00190358	0.331236	0.339867	-0.00863098	0.440354	0.457492	-0.0171381	0.222395	0.21405	0.00834548
cg06392956	0.823899	0.837013	-0.0131136	0.484686	0.509489	-0.024803	0.532051	0.508847	0.0232036	0.840103	0.829793	0.0103091
cg06400167	0.41668	0.387509	0.0291715	0.511088	0.493469	0.0176188	0.309583	0.32612	-0.0165377	0.205655	0.206427	-0.000771981
cg06406538	0.581033	0.530933	0.0501	0.562236	0.499087	0.0631491	0.545555	0.526899	0.0186559	0.491797	0.500995	-0.00919767
cg06408533	0.649552	0.658965	-0.00941286	0.725149	0.737533	-0.012384	0.784921	0.785918	-0.000996527	0.584416	0.575967	0.00844915
[truncated: 5,036 more rows]
